# Supplementary material for: Healthcare providers’ gestational weight gain counselling practises and the influence of knowledge and attitudes: a cross-sectional mixed methods study
Source: PubMed Central journal article supplement — BMJ Open. 2017 Nov 14;7(11):e018527. doi: 10.1136/bmjopen-2017-018527 (PMC5695303; doi:10.1136/bmjopen-2017-018527), 2017-11-14
Supplement: bmjopen-2017-018527.draft_revisions.pdf [file bmjopen-2017-018527.draft_revisions.pdf]

# BMJ Open

BMJ Open is committed to open peer review. As part of this commitment we make the peer review history of every article we publish publicly available.

When an article is published we post the peer reviewers' comments and the authors' responses online. We also post the versions of the paper that were used during peer review. These are the versions that the peer review comments apply to.

The versions of the paper that follow are the versions that were submitted during the peer review process. They are not the versions of record or the final published versions. They should not be cited or distributed as the published version of this manuscript.

BMJ Open is an open access journal and the full, final, typeset and author-corrected version of record of the manuscript is available on our site with no access controls, subscription charges or pay-per-view fees (<http://bmjopen.bmj.com>).

If you have any questions on BMJ Open's open peer review process please email [editorial.bmjopen@bmj.com](mailto:editorial.bmjopen@bmj.com)

# BMJ Open

## Health care provider's gestational weight gain counselling practices and the influence of knowledge and attitudes: A cross-sectional mixed methods study

|                                 |                                                                                                                                                                                                                                                                                                                                                                                                                                                                                                                                                                                             |
|---------------------------------|---------------------------------------------------------------------------------------------------------------------------------------------------------------------------------------------------------------------------------------------------------------------------------------------------------------------------------------------------------------------------------------------------------------------------------------------------------------------------------------------------------------------------------------------------------------------------------------------|
| Journal:                        | <i>BMJ Open</i>                                                                                                                                                                                                                                                                                                                                                                                                                                                                                                                                                                             |
| Manuscript ID                   | bmjopen-2017-018527                                                                                                                                                                                                                                                                                                                                                                                                                                                                                                                                                                         |
| Article Type:                   | Research                                                                                                                                                                                                                                                                                                                                                                                                                                                                                                                                                                                    |
| Date Submitted by the Author:   | 05-Jul-2017                                                                                                                                                                                                                                                                                                                                                                                                                                                                                                                                                                                 |
| Complete List of Authors:       | Morris, Jillian; University of Alberta, Agricultural, Food and Nutritional Science<br>Nikolopoulos, Hara; University of Alberta, Agricultural, Food and Nutritional Science<br>Berry, Tanya; University of Alberta, Faculty of Physical Education and Recreation<br>Jain, Venu; University of Alberta, Department of Obstetrics & Gynecology<br>Vallis, Michael; Dalhousie University, Behaviour Change Institute, Dept of Family Medicine<br>Piccinini-Vallis, Helena; Dalhousie University, Family Medicine<br>Bell, R; University of Alberta, Agricultural, Food and Nutritional Science |
| <b>Primary Subject Heading</b>: | Obstetrics and gynaecology                                                                                                                                                                                                                                                                                                                                                                                                                                                                                                                                                                  |
| Secondary Subject Heading:      | General practice / Family practice                                                                                                                                                                                                                                                                                                                                                                                                                                                                                                                                                          |
| Keywords:                       | Pregnancy, Health Care, Gestational Weight Gain, Counselling                                                                                                                                                                                                                                                                                                                                                                                                                                                                                                                                |
|                                 |                                                                                                                                                                                                                                                                                                                                                                                                                                                                                                                                                                                             |

SCHOLARONE™  
Manuscripts

1  
2  
3 1 **Health care provider's gestational weight gain counselling practices and the influence of**  
4 **knowledge and attitudes: A cross-sectional mixed methods study**  
5  
6  
7 3

8 4 Jill Morris<sup>1</sup>

9 5 Hara Nikolopoulos<sup>1</sup>

10 6 Tanya Berry<sup>2</sup>

11 7 Venu Jain<sup>3</sup>

12 8 Michael Vallis<sup>4</sup>

13 9 Helena Piccinini-Vallis<sup>5</sup>

14 10 Rhonda C Bell<sup>1</sup>

15 11 and the ENRICH team  
16  
17  
18  
19  
20  
21  
22  
23  
24

25 13 1. Department of Agricultural, Food and Nutritional Science, University of Alberta,  
26 14 Edmonton, Alberta, Canada, T6G 2E1

27 15 2. Faculty of Physical Education and Recreation, University of Alberta, 1-153 University  
28 16 Hall, Edmonton, Alberta, Canada, T6G 2J9

29 17 3. Department of Obstetrics & Gynecology, University of Alberta, 5S131 LHH, 10240  
30 18 Kingsway Ave., Edmonton, Alberta, Canada, T5H 3V9

31 19 4. Behaviour Change Institute, Dept of Family Medicine, Dalhousie University, Halifax,  
32 20 NS, Canada B3L 2C2

33 21 5. Department of Family Medicine, Dalhousie University, 5900 Veteran's Memorial Lane,  
34 22 Halifax, NS, Canada, B3H 2E2  
35  
36  
37  
38  
39  
40  
41  
42

43 24 **Correspondence to:** Dr. Rhonda C Bell, 4-126 Li Ka Shing Centre for Health Innovation,  
44 25 University of Alberta, Edmonton, Alberta, Canada, T6G 2E1, [rhonda.bell@ualberta.ca](mailto:rhonda.bell@ualberta.ca),  
45 26 Telephone: 780-492-7742

46 27 **Word count**

47 28 Manuscript: 3635  
48  
49  
50  
51  
52  
53

54 30 **Keywords:** Pregnancy, health care, gestational weight gain, counselling (*3-5 keywords*)  
55  
56  
57  
58  
59  
60

1  
2  
3 **Abstract**  
4  
5

6 **Objective:** To understand current gestational weight gain counselling practices of health care  
7  
8  
9 providers, and the relationships between practices, knowledge and attitudes.  
10

11 **Design:** Concurrent mixed methods with data integration: cross-sectional survey and semi-  
12  
13  
14 structured interviews.  
15

16 **Participants:** Prenatal health care providers in Canada: general practitioners, obstetricians,  
17  
18  
19 midwives, nurse practitioners, and registered nurses in primary care settings.  
20

21 **Results:** Typically, weight gain information was provided early in pregnancy, but not discussed  
22  
23  
24 again unless there was a concern. Few routinely provided women with individualized weight  
25  
26  
27 gain advice (21%), rate of weight gain (16%), or discussed the risks of inappropriate weight gain  
28  
29  
30 to mother and baby (20% and 19%). More routinely discussed physical activity (46%) and food  
31  
32  
33 requirements (28%); midwives did these two activities more frequently than all other disciplines  
34  
35  
36 (p<0.001). Midwives interviewed noted a focus on overall wellness instead of weight, and had  
37  
38  
39 longer appointments for in-depth counselling. Regression results identified that the priority level  
40  
41  
42 that health care providers place on gestational weight gain was most strongly related to providing  
43  
44  
45 weight gain advice and discussing risks of weight gain outside recommendations ( $\beta=0.71$ ,  
46  
47  
48 p<0.001) and discussing physical activity and food requirements ( $\beta=0.341$ , p<0.001). Interview  
49  
50  
51 data linked the priority level of GWG to length of appointments, compensation methods for  
52  
53  
54 health care providers, and the midwifery versus medical model of care.  
55  
56  
57

58 **Conclusions:** Interventions for health care providers to enhance gestational weight gain  
59  
60  
61 counselling practices should consider the range of factors that influence the priority level health  
62  
63  
64 care providers place on gestational weight gain counselling.  
65  
66

1  
2  
3 54 **Strengths and Limitations Of This Study: (max 5 bullet points)**  
4

- 5 55 • This is a large and in-depth examination and comparison of health care providers'  
6  
7  
8 56 practices related to monitoring and discussing gestational weight gain with pregnant  
9  
10 57 women, and is enhanced by the use of mixed methods.  
11  
12 58 • The topics covered in this survey are considered routine and are undertaken as part of  
13  
14 59 standard prenatal care in most developed countries.  
15  
16  
17 60 • It was not possible to calculate a true response rate for the survey since the survey was  
18  
19 61 distributed using email lists and social media through professional associations and  
20  
21 62 networks.  
22  
23 63 • While these methods allowed for a wider reach and more responses, those who responded  
24  
25 64 may be more likely to engage in activities related to GWG counselling, which is  
26  
27 65 concerning since the rates of some counselling practices are quite low.  
28  
29  
30  
31  
32  
33  
34  
35  
36  
37  
38  
39  
40  
41  
42  
43  
44  
45  
46  
47  
48  
49  
50  
51  
52  
53  
54  
55  
56  
57  
58  
59  
60

## Introduction

Supporting all women to achieve healthy gestational weight gain (GWG) is of clinical importance because weight gain lower or higher than recommended is linked with a range of poor maternal, fetal, and childhood outcomes. [1] For mothers, excess GWG increases the risk of gestational diabetes mellitus and hypertensive disorders in pregnancy, and this is of special concern if excessive GWG occurs early in pregnancy. [2-4] Excess GWG also poses risks at delivery for the mother including increased likelihood of needing an instrumental delivery or a Caesarean section, and surgical morbidity and mortality. [1, 3] Further, these factors result in an increased risk for the fetus and neonate including the adverse consequences of macrosomia and shoulder dystocia, need for intensive care unit admission, and the risk of perinatal death. [1, 3] [5] In the long term, the child is at risk of an altered growth trajectory that may lead to obesity. [6, 7] Excess GWG also increases the risk of postpartum weight retention, which may leave a woman at an increased Body Mass Index (BMI) to begin her next pregnancy. [1] [8] The cycle of excess GWG followed by postpartum weight retention and increasing maternal BMI can lead to increased risk in each subsequent pregnancy.[9] These risks act synergistically resulting in a higher risk of metabolic and cardiovascular disease in later life for the mother as well as the child.[10] Thus, excess GWG has a short term, long term and intergenerational effects. [11]

To mitigate the risks of inappropriate GWG, many countries, including Canada, have released GWG guidelines. [12] [13] Many of these are based on the Institute of Medicine (USA) guidelines for weight gain in pregnancy, which outline a range of total weight gain over the course of pregnancy that is associated with optimal health outcomes for mother and child. [14] In order for these guidelines to be of benefit to pregnant women, the Institute of Medicine recommends that health care providers advise women on the recommended range of weight gain

1  
2  
3 based on pre-pregnancy BMI, track and discuss weight progress over the course of pregnancy, as  
4 well as offer tailored counselling on dietary intake and physical activity. [15] Many countries  
5  
6 provide guidance to health care providers in the form of evidence-based guidelines in order to  
7  
8 support them in providing physical activity and nutrition counselling to pregnant women. [16]  
9  
10  
11  
12 [17-19]

13  
14  
15  
16 There is growing evidence to suggest that the quality of GWG counselling interactions needs  
17  
18 improvement, as women and health care providers report conflicting views of these interactions.  
19  
20 [20] Many women report that their health care provider did not provide recommendations for  
21  
22 GWG during their prenatal care, nor provide counselling about nutrition and physical activity  
23  
24 behaviours during pregnancy [21, 22] Health care providers have reported taking a reactive  
25  
26 approach, initiating a discussion about weight in pregnancy only after weight exceeds the  
27  
28 recommendations. [23, 24] Health care providers may lack knowledge or skills to undertake this  
29  
30 type of counselling[25] [26], or consider GWG to be a low priority in the context of a typical  
31  
32 prenatal visit.[23]

33  
34  
35  
36  
37  
38  
39 Women may see a variety of health care provider disciplines for prenatal care including general  
40  
41 practitioners, obstetricians, midwives, nurse practitioners, and registered nurses. [27] There is  
42  
43 some evidence to suggest that the approach to GWG counselling may vary by health care  
44  
45 provider discipline [28, 29]; however, this area has not been fully explored. In order to better  
46  
47 support health care providers to have positive GWG counselling interactions with women, there  
48  
49 needs to be a detailed understanding of current practices, and what is influencing these practices.  
50  
51 This information can be used to develop interventions to promote appropriate GWG in routine  
52  
53 prenatal care. As such, the objectives of this study were to characterize and compare the GWG  
54  
55  
56  
57  
58  
59  
60

1  
2  
3 counselling practices of health care providers who provide prenatal care; and to examine  
4  
5 potential influences on advice and counselling practices.  
6  
7  
8  
9

## 10 11 **Methods**

### 12 Study design

13  
14  
15 This study was conducted using a concurrent mixed methods design, consisting of an online  
16  
17 survey and semi-structured qualitative interviews. Qualitative and quantitative data were  
18  
19 collected in tandem, analyzed separately, and integrated.[30] Mixed methods research is well  
20  
21 suited for research questions that call for real-life contextual understandings and multi-level  
22  
23 influences, and lends well to the development of complex interventions. [31]  
24  
25  
26  
27

28  
29  
30 Ethics approval for this study was obtained from the Health Research Ethics Board at the  
31  
32 University of Alberta. All participants provided informed consent to participate in this study.  
33  
34  
35

### 36 Quantitative methods

#### 37 *Survey development*

38  
39  
40 A survey questionnaire was developed, pilot-tested, and assessed for content validity by a team  
41  
42 of researchers with expertise in the areas of obstetrics, nutrition, exercise physiology, health  
43  
44 promotion, and health psychology.  
45  
46  
47

#### 48 *Recruitment and data collection*

49  
50  
51 Health care providers including general practitioners, obstetricians, midwives, nurse  
52  
53 practitioners, and registered nurses in primary care settings from across Canada were recruited  
54  
55 through professional associations and networks who agreed to distribute survey information to  
56  
57  
58  
59  
60



1  
2  
3 their members. All health care providers who provided prenatal care were eligible to participate.  
4  
5 The survey was available from December 2014 to May 2015 on Research Electronic Data  
6  
7 Capture (REDCap) software hosted at the University of Alberta.[32]  
8  
9

### 10 *Outcomes*

11  
12 Survey participants provided information about their professional characteristics, and were asked  
13  
14 to respond to questions regarding their practices, knowledge, and attitudes related to GWG,  
15  
16 nutrition and physical activity. Specifically, participants were asked about the proportion of their  
17  
18 pregnant patients with whom they undertook selected GWG counselling practices as outlined in  
19  
20 the Institute of Medicine recommendations[15], using a scale from 1 (<10% of pregnant patients)  
21  
22 to 5 (>90% of pregnant patients). Respondents were also asked about their general knowledge to  
23  
24 support GWG counselling, their detailed knowledge of practice guidelines related to GWG  
25  
26 (specifically the IOM/Health Canada GWG guidelines[33], and Health Canada's nutrition  
27  
28 guidelines[34] and physical activity guidelines[35]), and the priority level they placed on  
29  
30 discussing, assessing, and assisting women with GWG (e.g., *Given all the issues of concern*  
31  
32 *during a typical prenatal visit, I consider discussing GWG a high priority*). These questions  
33  
34 assessed agreement with each statement on a scale from 1 (strongly disagree) to 5 (strongly  
35  
36 agree). The survey also examined whether health care providers considered themselves to be the  
37  
38 most appropriate person within their practice setting to provide GWG counselling (*I am the most*  
39  
40 *appropriate provider in my practice setting to discuss GWG*).  
41  
42  
43  
44  
45  
46  
47  
48  
49

### 50 *Data analysis*

51  
52 GWG counselling practices of each health care provider group were calculated as frequency and  
53  
54 percentage of responses, dichotomized into "Routine (undertaken with >90% of pregnant  
55  
56  
57  
58  
59  
60

1  
2  
3 patients)” and “Not routine” (all other response choices) based on the Institute of Medicine  
4  
5 recommendations that these practices occur with every woman (IOM, 2013).[15] Cases with  
6  
7 missing data were removed from analyses. Principal components analysis was used to reduce  
8  
9 the numerous survey questions into a smaller number of factors. The mean score of the items  
10  
11 loading onto each factor was used to represent that factor score for respondents. [36] For  
12  
13 example, four questions loaded onto a factor that was named “Providing Weight Gain Advice  
14  
15 and Discussing Risks” and were averaged together into a composite score for that factor. Mean  
16  
17 scores were calculated for the remaining factors of General Knowledge, Detailed Knowledge of  
18  
19 Practice Guidelines, and the Priority Level Health Care Providers Place on GWG, in a similar  
20  
21 manner. Differences in mean composite scores were compared among health care provider  
22  
23 disciplines using one-way ANOVA) with Bonferroni post-hoc tests; residuals for all composite  
24  
25 scores were normally distributed. Mean scores for each factor were used in multiple linear  
26  
27 regression models to evaluate the relationship between the predictors of interest and GWG  
28  
29 counselling practices. For all models, multicollinearity was not an issue with all tolerance values  
30  
31  $>0.36$  and variance inflation factors  $<2.8$ .

## 32 33 34 35 36 37 38 39 40 41 Qualitative methods

### 42 43 44 *Outcomes*

45  
46 An interview guide was developed by the study team based on the study objectives and included  
47  
48 questions and prompts regarding health care provider practices in relation to GWG, as well as the  
49  
50 reasons behind these practices. The interview guide also included questions regarding provider  
51  
52 knowledge in and attitudes towards GWG.  
53  
54  
55  
56  
57  
58  
59  
60

### *Recruitment and data collection*

Potential participants were identified through collaborating members of the study team. A sample of maximum variation was recruited to gather the perspectives of health care providers from the different of disciplines practicing in urban or rural locations in two Canadian provinces (Alberta and British Columbia). Interviews were conducted over the telephone, audio-recorded and transcribed verbatim.

### *Data analysis*

Qualitative content analysis was used to describe and inductively interpret the data.[37, 38]

Audio recordings and transcripts were reviewed and transcripts were coded line by line. Codes were categorized and re-categorized as patterns emerged. Data analysis occurred concurrently with data collection, and sampling adequacy was demonstrated by saturation of the data, as replication occurred in categories as new participants were included in the analysis.[39]

Findings were discussed and approved by the study team.

### Data integration

The categories emerging inductively from the interviews were compared with the results from the quantitative survey to determine if findings from each method confirmed the other, as well as to expand the strength of each type of data to better explain the phenomenon.[40]

## **Results**

### Participant characteristics

1  
2  
3 Overall, 1189 health care providers responded to the survey. Of these, 122 did not meet the  
4 eligibility criteria, 27 did not specify their health care provider discipline, 155 did not answer any  
5 questions beyond practice characteristics, and 377 indicated a health care provider discipline that  
6 was outside the scope of these analyses. Thus, 508 responses from general practitioners,  
7 obstetricians, midwives, nurse practitioners and registered nurses in primary care settings from  
8 across Canada are included in this analysis (Table 1). Twenty-three health care providers from  
9 these same disciplines participated in the interviews.  
10  
11  
12  
13  
14  
15  
16  
17  
18  
19  
20  
21

### 22 Gestational weight gain counselling practices of health care providers

#### 23 *Providing weight gain advice and discussing risks*

24  
25 A small proportion of health care providers routinely provided women with a weight gain target  
26 based on their pre-pregnancy BMI and discussed the recommended rate of weight gain based on  
27 their weight gain target (21% and 16%; Table 2). Few indicated that they routinely discussed the  
28 impacts of inappropriate weight gain on mother (20%) and baby (19%). The composite score for  
29 “Providing weight gain advice and discussing the risks” did not differ between health care  
30 provider disciplines (Table 3).  
31  
32  
33  
34  
35  
36  
37  
38  
39  
40  
41  
42

43 Key concepts and quotes relating to counselling practices that emerged from the interviews are  
44 outlined in Table 4. Interviewees described that the first prenatal visit includes measurement of  
45 weight, calculation of BMI, and a large amount of information sharing, including general  
46 information on GWG. Some health care providers advised women on a total weight gain target;  
47 however, this was not always congruent with guidelines. The amount of information provided in  
48 the first visit was perceived by the health care providers to be overwhelming for women.  
49  
50  
51  
52  
53  
54  
55  
56  
57  
58  
59  
60

### *Weight assessment*

Approximately three-quarters of health care providers weighed women at every visit (76%), while half would routinely relay weight gain information to women every time they are weighed (Table 2). Midwives reported measuring weight at every visit less frequently than all other disciplines (Table 3).

Interviewees noted that weight was typically measured at each visit, except for midwives who generally measured women's weight if clinically necessary, or if women requested them to do so (Table 4). After the first visit, interview participants indicated that they revisited the topic to varying levels of depth, typically only when the health care provider or woman expressed concern about her weight.

### *Discussing physical activity and food requirements*

Nearly half (46%) of health care providers reported routinely discussing physical activity with women while about one-third routinely discussed appropriate extra food requirements (28%), and only about one-third felt they could routinely give examples of appropriate changes that women could make to meet extra food requirements (32%) (Table 2). In contrast, over two-thirds would discuss the importance of prenatal vitamins (67%). The composite score for the three survey questions regarding discussing physical activity and food requirements differed between health care provider disciplines (Table 3). Midwives did this more frequently than all other disciplines except for nurse practitioners.

1  
2  
3 Health care providers of all disciplines described providing general information on GWG,  
4 physical activity, and nutrition in the early stages of pregnancy, and many indicated providing  
5 women with print resources in this area (Table 4). The midwives interviewed described  
6 spending more time assessing women's current lifestyle and providing individualized advice  
7 than did physicians (Table 4).  
8  
9  
10  
11  
12  
13  
14  
15  
16  
17

### 18 Predictors of counselling practices

19 Health care providers, regardless of discipline, reported similar responses for having appropriate  
20 general knowledge of GWG, physical activity, and nutrition, as well as knowledge of related  
21 practice guidelines (Table 3); the difference between midwives and registered nurses responses  
22 was significant. However, there were significant differences in the level of priority placed on  
23 GWG. Midwives and obstetricians had lower composite scores for the priority level they place  
24 on GWG than general practitioners and nurse practitioners, but did not differ significantly from  
25 each other (Table 3). The majority of health care providers considered discussing GWG with  
26 women to be within their role (77%).  
27  
28  
29  
30  
31  
32  
33  
34  
35  
36  
37  
38  
39  
40

### 41 *Predictors of providing weight gain advice and discussing risks*

42 The composite score for providing weight gain advice and discussing risks of inappropriate  
43 weight gain was most strongly related to the priority level that health care providers placed on  
44 GWG (Table 5), followed by their detailed knowledge of GWG, physical activity, and nutrition  
45 guidelines.  
46  
47  
48  
49  
50  
51  
52  
53  
54  
55  
56  
57  
58  
59  
60

1  
2  
3 Many health care providers in the interviews reported that GWG discussions may receive lower  
4 priority due to the time constraints in a typical appointment (Table 4). This was related to their  
5 compensation method, as general practitioners and obstetricians were remunerated in a fee-for-  
6 service model that resulted in restriction on the length of appointments, as well as the topics  
7 covered. Midwives were compensated by course-of-care, which resulted in longer and more  
8 flexible appointments. However, midwives described a lower priority level placed on GWG, as  
9 their practice was less focussed on weight, in particular weight assessment, and more focussed  
10 on a woman's overall health and wellbeing. Health care providers' perceptions of the sensitivity  
11 of discussing GWG with pregnant women were also related to their providing weight gain advice  
12 and discussing risks (Table 4). Some health care providers noted their discomfort with initiating  
13 GWG discussions, or discussing GWG too frequently, as they were concerned that this may  
14 cause psychological distress for the woman.  
15  
16  
17  
18  
19  
20  
21  
22  
23  
24  
25  
26  
27  
28  
29  
30  
31  
32  
33

#### 34 *Predictors of discussing physical activity and food requirements*

35  
36 The priority level that health care providers place on GWG, their detailed knowledge of GWG,  
37 nutrition, and physical activity guidelines, and their general knowledge of this area were all  
38 significantly related to their discussing physical activity and food requirements with women  
39 during a prenatal visit. After adjustment for practice characteristics, being a midwife remained a  
40 significant predictor of this activity within a prenatal visit.  
41  
42  
43  
44  
45  
46  
47  
48  
49  
50

51 Midwifery practices in relation to discussing physical activity and food requirements also  
52 emerged from the interview data (Table 4). Midwives reported that their approach focussed on  
53 overall health and wellness, and centred on support for women. Knowledge was another key  
54  
55  
56  
57  
58  
59  
60

1  
2  
3 factor that came to light in the interviews, as some health care providers noted a need for  
4 additional knowledge, particularly in nutrition and maternal obesity. For health care providers  
5  
6 additional knowledge, particularly in nutrition and maternal obesity. For health care providers  
7  
8 working within a multidisciplinary team, access to dietitian services was an important  
9  
10 enhancement to GWG counselling practices.  
11

## 12 13 14 15 16 **Discussion**

17  
18 GWG counselling by health care providers falls below the recommendations from the Institute of  
19  
20 Medicine and other national health agencies. [15] Although many of the health care providers  
21  
22 interviewed indicated that they regularly calculate and record women's pre-pregnancy BMI, few  
23  
24 survey respondents from any discipline routinely provided women with a comprehensive GWG  
25  
26 recommendation and advice on rate of weight gain based on their pre-pregnancy BMI. In  
27  
28 addition, few survey respondents reported discussing the risks of inappropriate weight gain with  
29  
30 women. While many health care providers reported providing a general message of the  
31  
32 importance of prenatal vitamins, fewer reported routinely discussing topics such as appropriate  
33  
34 extra food requirements. Weight was typically measured at each prenatal appointment, but not  
35  
36 discussed unless it was a concern.  
37  
38  
39  
40  
41  
42  
43  
44

45 This study identified that the priority level that health care providers placed on GWG had the  
46  
47 strongest relationship with their practices. The qualitative results provided context to this  
48  
49 finding, linking the priority level of GWG to the time available in a typical prenatal appointment,  
50  
51 and the compensation that health care providers receive for their time. As well, this study  
52  
53 identified the importance of detailed knowledge of practice guidelines, which also was strongly  
54  
55 associated with counselling practices.  
56  
57  
58  
59  
60



1  
2  
3  
4  
5  
6 A novel finding was documentation of the different approach reported by midwives. Midwives  
7  
8 noted that their focus on the overall wellbeing of the women meant they discussed physical  
9  
10 activity and nutrition in more depth than did physicians, and they measured weight less  
11  
12 frequently. Even after controlling for multiple other predictors, being a midwife remained a  
13  
14 significant predictor of discussing physical activity and food requirements with women during  
15  
16 routine prenatal care. Future studies should focus on learning about the quality of these  
17  
18 discussions and evaluating their impact on gestational weight gain, health behaviours, and  
19  
20 women's perceptions of support. This additional information could help guide or refine  
21  
22 approaches to antenatal care undertaken by different groups of care providers.  
23  
24  
25  
26  
27  
28

29 A major strength of this study is the use of mixed research methods. This allowed for  
30  
31 verification of findings between methods, and provided a broader picture of "who is doing  
32  
33 what", as well as "why and how are they doing it". To our knowledge, this is the largest and  
34  
35 most comprehensive survey on this topic to date. While prenatal care varies between countries,  
36  
37 the topics covered in this survey are considered routine and are undertaken as part of standard  
38  
39 prenatal care in most developed countries.  
40  
41  
42  
43  
44  
45

46 This study has limitations that should be considered. It was not possible to calculate a true  
47  
48 response rate for the survey since the survey was distributed using email lists and social media  
49  
50 through professional associations and networks. While this method of recruitment allowed for a  
51  
52 wider reach, and ultimately more responses, those who responded may be more likely to engage  
53  
54 in activities related to GWG counselling. This could lead to inflation of the reported frequency  
55  
56  
57  
58  
59  
60

1  
2  
3 of specific GWG counselling practices. This is concerning as they are already quite low for  
4  
5 some counselling practices and further highlights the need for targeted interventions in this area.  
6  
7

8  
9  
10 The qualitative interviews were only conducted in two provinces, and there is the potential that  
11  
12 this does not accurately capture the practices and predictors in other geographic areas. However,  
13  
14 the congruency of the qualitative and quantitative findings suggests that this is unlikely.  
15  
16 Furthermore, a recent systematic review found few differences in barriers and facilitators to  
17  
18 pregnancy weight management in studies from around the world, suggesting that the findings of  
19  
20 the current study may help inform practice in various health care systems.[41]  
21  
22  
23

24  
25  
26 To our knowledge, this is the first mixed methods study to examine GWG counselling, in  
27  
28 particular for the specific counselling practices recommended by the Institute of Medicine.  
29  
30 While survey and qualitative research studies from various parts of the world have also found  
31  
32 low rates of GWG counselling as reported by patients, other surveys of health care providers  
33  
34 have found high self-reported rates of counselling.[20, 28] This discrepancy may due to the  
35  
36 frequency with which health care providers undertake counselling, as studies from the US have  
37  
38 found that health care providers report discussing GWG more often with women who are  
39  
40 overweight or obese to begin pregnancy.[24] Therefore, they may report that they provide GWG  
41  
42 counselling, but not to every pregnant woman. Further, when the depth of this counselling is  
43  
44 explored, the self-reported rates are likely to diminish.  
45  
46  
47  
48  
49  
50

51  
52  
53 In other research, patients of midwives were more likely to recall having discussed physical  
54  
55 activity with their health care provider as compared to patients of general practitioners and  
56  
57  
58  
59  
60

1  
2  
3 obstetricians,[29] and midwives themselves report providing physical activity counselling to  
4 women more frequently than other disciplines.[20, 28] While the present study considered  
5 physical activity and nutrition counselling practices as one composite score, there seems to be  
6 growing evidence that midwives provide more lifestyle counselling than other health care  
7 provider disciplines. Expanding discussions on GWG to a healthier lifestyle is highly relevant  
8 given the growing body of evidence related to their impact on disease in later life.[10] Whether  
9 other health care providers can adopt similar practices remains to be determined, but regardless,  
10 providers across disciplines require knowledge of GWG, physical activity, and nutrition  
11 guidelines and may need system-level changes such as more time in an appointment to help them  
12 make it a priority in their practice. A different model for dissemination of this knowledge needs  
13 consideration. Multidisciplinary clinics that include professionals with a background in nutrition  
14 and physical activity, and group educational sessions may be important in this regard. The latter  
15 approach could allow participants to discuss these issues amongst themselves and may provide  
16 positive reinforcement of new knowledge and help to shift old beliefs.[42] Further, discussion of  
17 healthy GWG and maintenance of a healthy weight trajectory with women by health providers is  
18 a missed opportunity for positive feedback for a healthy and potentially long-term behavior.

19  
20  
21  
22  
23  
24  
25  
26  
27  
28  
29  
30  
31  
32  
33  
34  
35  
36  
37  
38  
39  
40  
41  
42  
43 This study identified predictors of GWG counselling at the individual and health care system  
44 level. At the individual level, health care providers' attitudes towards GWG was related to  
45 practices, including the level of priority they placed on GWG, and their perception of GWG as a  
46 sensitive topic to discuss. As well, health care providers' knowledge, and in particular their  
47 detailed knowledge of practice guidelines, was related to the frequency of GWG counselling. At  
48 the system level, the compensation method impacted the amount of time they had in a typical  
49  
50  
51  
52  
53  
54  
55  
56  
57  
58  
59  
60

1  
2  
3 prenatal appointment, which in turn was related to the priority level they placed on GWG and  
4  
5 ultimately the frequency and depth of their counselling. Another important consideration is the  
6  
7 differences in practices, and influences on practices, by health care provider discipline.  
8  
9

10 Interventions to implement best practices should consider the multi-level influences on GWG  
11  
12 counselling practices, as well as the discipline of the health care provider, in order to be effective  
13  
14 at changing health care provider behaviours.  
15  
16

17  
18  
19 While the Institute of Medicine's recommendations for implementing their GWG guidelines  
20  
21 were based on expert consensus, research is needed to elucidate the most effective counselling  
22  
23 methods and promising practices to recommend and help women achieve in order to promote  
24  
25 appropriate GWG. Supporting health care providers to better counsel their pregnant patients on  
26  
27 appropriate GWG is one important step towards improving the health of generations to come.  
28  
29  
30  
31  
32  
33  
34  
35  
36  
37  
38  
39  
40  
41  
42  
43  
44  
45  
46  
47  
48  
49  
50  
51  
52  
53  
54  
55  
56  
57  
58  
59  
60

## References

- 1 Viswanathan M, Siega-Riz AM, Moos MK, et al. Outcomes of maternal weight gain. *Evid Rep Technol Assess* 2008(168):1-223.
- 2 Carreno CA, Clifton RG, Hauth JC, et al. Excessive early gestational weight gain and risk of gestational diabetes mellitus in nulliparous women. *Obstet Gynecol* 2012;119(6):1227-33.
- 3 Joy S, Istwan N, Rhea D, et al. The impact of maternal obesity on the incidence of adverse pregnancy outcomes in high-risk term pregnancies. *Am J Perinatology* 2009;26(5):345-9.
- 4 Thorsdottir I, Torfadottir JE, Birgisdottir BE, et al. Weight gain in women of normal weight before pregnancy: complications in pregnancy or delivery and birth outcome. *Obstet Gynecol* 2002;99(5 Pt 1):799-806.
- 5 Kristensen J, Vestergaard M, Wisborg K, et al. Pre-pregnancy weight and the risk of stillbirth and neonatal death. *BJOG* 2005;112(4):403-8.
- 6 Robinson SM, Crozier SR, Harvey NC, et al. Modifiable early-life risk factors for childhood adiposity and overweight: an analysis of their combined impact and potential for prevention. *Am J Clin Nutr* 2015;101(2):368-75.
- 7 Houghton LC, Ester WA, Lumey LH, et al. Maternal weight gain in excess of pregnancy guidelines is related to daughters being overweight 40 years later. *Am J Obstet Gynecol* 2016;215(2):246.e1-.e8.
- 8 Hutcheon JA, Chapinal N, Bodnar LM, et al. The INTERGROWTH-21st gestational weight gain standard and interpregnancy weight increase: A population-based study of successive pregnancies. *Obesity (Silver Spring)* 2017;25(6):1122-7.
- 9 Gilmore LA, Klempel-Donchenko M, Redman LM. Pregnancy as a window to future health: Excessive gestational weight gain and obesity. *Seminars in Perinatology* 2015;39(4):296-303.
- 10 Leddy MA, Power ML, Schulkin J. The impact of maternal obesity on maternal and fetal health. *Rev Obstet Gynecol* 2008;1(4):170-8.
- 11 Melzer K, Schutz Y. Pre-pregnancy and pregnancy predictors of obesity. *Int J Obesity* 2010;34 Suppl 2:S44-52.
- 12 Scott C, Andersen CT, Valdez N, et al. No global consensus: a cross-sectional survey of maternal weight policies. *BMC Pregnancy Childbirth* 2014;14:167.
- 13 Health Canada. Healthy Weight Gain During Pregnancy. Ottawa, Canada: Government of Canada; 2014.

- 1  
2  
3  
4  
5  
6  
7  
8  
9  
10  
11  
12  
13  
14  
15  
16  
17  
18  
19  
20  
21  
22  
23  
24  
25  
26  
27  
28  
29  
30  
31  
32  
33  
34  
35  
36  
37  
38  
39  
40  
41  
42  
43  
44  
45  
46  
47  
48  
49  
50  
51  
52  
53  
54  
55  
56  
57  
58  
59  
60
- 14 Institute of Medicine. Weight Gain During Pregnancy: Reexamining the Guidelines. Rasmussen KM, Yaktine A, editors. Washington, DC: National Academies Press; 2009.
- 15 Institute of Medicine. Implementing Guidelines on Weight Gain and Pregnancy. Bethesda, MD: Institute of Medicine and National Research Council; 2013.
- 16 O'Connor DL, Blake J, Bell R, et al. Canadian Consensus on Female Nutrition: Adolescence, Reproduction, Menopause and Beyond. *JOGC* 2016;38(6):408-554.
- 17 Australian Government. Healthy Eating When You're Pregnant or Breastfeeding Canberra, Australia: National Health and Medical Research Council; 2015 [June 13, 2017]. Available from: <https://www.eatforhealth.gov.au/eating-well/healthy-eating-throughout-all-life/healthy-eating-when-you%E2%80%99re-pregnant-or-breastfeeding>.
- 18 American College of Obstetricians and Gynecologists. Nutrition During Pregnancy 2015 [June 13, 2017]. Available from: <http://www.acog.org/Patients/ACOG-Pregnancy-Book>.
- 19 Swedish National Food Agency. Food for you who are pregnant. Uppsala, Sweden: Swedish National Food Agency; 2015.
- 20 Lutsiv O, Bracken K, Pullenayegum E, et al. Little congruence between health care provider and patient perceptions of counselling on gestational weight gain. *J Obstet Gynaecol Can* 2012;34(6):518-24.
- 21 Ferrari RM, Siega-Riz AM, Evenson KR, et al. Provider advice about weight loss and physical activity in the postpartum period. *J Womens Health (Larchmt)* 2010;19(3):397-406.
- 22 Nikolopoulos H, Mayan M, MacIsaac J, et al. Women's perceptions of discussions about gestational weight gain with health care providers during pregnancy and postpartum: a qualitative study. *BMC Pregnancy Childbirth* 2017;17:97.
- 23 Chang T, Llanes M, Gold KJ, et al. Perspectives about and approaches to weight gain in pregnancy: a qualitative study of physicians and nurse midwives. *BMC Pregnancy Childbirth* 2013;13:47-.
- 24 Duthie EA, Drew EM, Flynn KE. Patient-provider communication about gestational weight gain among nulliparous women: a qualitative study of the views of obstetricians and first-time pregnant women. *BMC Pregnancy Childbirth* 2013;13:231.
- 25 Herring SJ, Platek DN, Elliott P, et al. Addressing Obesity in Pregnancy: What Do Obstetric Providers Recommend? *Journal of Women's Health* 2010;19(1):65-70.
- 26 Stotland NE, Gilbert P, Bogetz A, et al. Preventing excessive weight gain in pregnancy: how do prenatal care providers approach counseling? *J Womens Health (Larchmt)* 2010;19(4):807-14.
- 27 Chalmers B, Dzakpasu S, Heaman M, et al. The Canadian maternity experiences survey: an overview of findings. *J Obstet Gynaecol Can* 2008;30(3):217-28.

- 1  
2  
3 28 Ferraro ZM, Boehm KS, Gaudet LM, et al. Counseling about gestational weight gain and  
4 healthy lifestyle during pregnancy: Canadian maternity care providers' self-evaluation. *Int J*  
5 *Womens Health* 2013;5:629-36.  
6  
7  
8 29 McDonald SD, Pullenayegum E, Bracken K, et al. Comparison of midwifery, family  
9 medicine, and obstetric patients' understanding of weight gain during pregnancy: a minority of  
10 women report correct counselling. *J Obstet Gynaecol Can* 2012;34(2):129-35.  
11  
12 30 Zhang W, Creswell J. The use of "mixing" procedure of mixed methods in health services  
13 research. *Medical Care* 2013;51(8):e51-7.  
14  
15  
16 31 Creswell J, Klassen AC, Plano Clark V, et al. Best Practices for Mixed Methods Research  
17 in the Health Sciences. In: Office of Behavioral and Social Sciences Research, editor. Bethesda,  
18 MD: National Institutes of Health; 2011.  
19  
20  
21 32 Harris PA, Taylor R, Thielke R, et al. Research electronic data capture (REDCap)--a  
22 metadata-driven methodology and workflow process for providing translational research  
23 informatics support. *J Biomed Inform* 2009;42(2):377-81.  
24  
25 33 Prenatal Nutrition Guidelines for Health Professionals - Gestational Weight Gain  
26 Recommendations. Health Canada. Ottawa: Health Canada; 2010.  
27  
28 34 Health Canada. Eating Well with Canada's Food Guide. In: Office of Nutrition Policy and  
29 Promotion, editor. Ottawa, ON Canada: Government of Canada; 2007.  
30  
31 35 Public Health Agency of Canada. Physical Activity and Pregnancy. Ottawa, ON, Canada:  
32 Public Health Agency of Canada; 2012.  
33  
34  
35 36 Norman G. Likert scales, levels of measurement and the "laws" of statistics. *Adv Health*  
36 *Sci Educ Theory Pract* 2010;15(5):625-32.  
37  
38 37 Elo S, Kyngas H. The qualitative content analysis process. *J Adv Nursing*  
39 2008;62(1):107-15.  
40  
41  
42 38 Hsieh HF, Shannon SE. Three approaches to qualitative content analysis. *Qual Health*  
43 *Res* 2005;15(9):1277-88.  
44  
45 39 Morse JM, Barrett M, Mayan M, et al. Verification strategies for establishing reliability  
46 and validity in qualitative research. *Intl J Qualitative Methods* 2002;1(2):Article 2.  
47  
48 40 Fetters MD, Curry LA, Creswell JW. Achieving integration in mixed methods designs-  
49 principles and practices. *Health Services Research* 2013;48(6 Pt 2):2134-56.  
50  
51  
52 41 Heslehurst N, Newham J, Maniatopoulos G, et al. Implementation of pregnancy weight  
53 management and obesity guidelines: A meta-synthesis of healthcare professionals' barriers and  
54 facilitators using the Theoretical Domains Framework. *Pregnancy Hypertens* 2014;4(3):234-5.  
55  
56  
57  
58  
59  
60

1  
2  
3 42 Magriples U, Boynton MH, Kershaw TS, et al. The impact of group prenatal care on  
4 pregnancy and postpartum weight trajectories. *Am J Obstet and Gynecol* 2015;213(5):688 e1-9.  
5  
6  
7  
8  
9  
10  
11  
12  
13  
14  
15  
16  
17  
18  
19  
20  
21  
22  
23  
24  
25  
26  
27  
28  
29  
30  
31  
32  
33  
34  
35  
36  
37  
38  
39  
40  
41  
42  
43  
44  
45  
46  
47  
48  
49  
50  
51  
52  
53  
54  
55  
56  
57  
58  
59  
60

For peer review only



### **Authors' contributions**

RCB and HN designed the study, and with MV and HPV developed the interview guide and survey questionnaire. JM and HN recruited interview participants and conducted the interviews. JM recruited survey participants, conducted the qualitative and quantitative analyses and wrote the first draft of the manuscript. HN and RCB contributed to the qualitative analysis and TB and RCB contributed to quantitative analysis. VJ contributed to recruitment of interview participants. All authors made significant contributions to the critical review and revisions of the manuscript. JM and RCB are the guarantors of the manuscript. All authors had full access to all of the data (including statistical reports and tables) in the study and can take responsibility for the integrity of the data and the accuracy of the data analysis. JM affirms that the manuscript is an honest, accurate, and transparent account of the study being reported; that no important aspects of the study have been omitted.

### **Acknowledgements**

We would like to thank all of the participants in both components of the study for their time and insight. We would also like to thank Melisa Spaling for her contribution to the analysis of the qualitative data and Adam King for his help with recruiting participants to interview from British Columbia.

### **Conflict of interest**

All authors have completed the ICMJE uniform disclosure form at [www.icmje.org/coi\\_disclosure.pdf](http://www.icmje.org/coi_disclosure.pdf) and declare: no support from any organisation for the submitted work; no financial relationships with any organisations that might have an interest in the submitted work in the previous three years; no other relationships or activities that could appear to have influenced the submitted work.

**Funding:**

This study was funded by grants from Alberta Innovates – Health Solutions and the Danone Institute of Canada. The funders had no involvement in the study design; in the collection, analysis, and interpretation of data; in the writing of the report; nor the decision to submit the article for publication.

**Data Sharing:**

The data used for these analyses are not currently available for public use.

For peer review only

Table 1. Characteristics of participating Canadian health care providers.

|                                                   | Survey Participants<br>N=508 |     | Interview Participants<br>N=23 |     |
|---------------------------------------------------|------------------------------|-----|--------------------------------|-----|
|                                                   | n                            | %   | n                              | %   |
| Health care provider discipline                   |                              |     |                                |     |
| General Practitioner                              | 159                          | 31% | 7                              | 30% |
| Obstetrician                                      | 139                          | 27% | 5                              | 22% |
| Midwife                                           | 97                           | 19% | 5                              | 22% |
| Nurse Practitioner                                | 38                           | 7%  | 2                              | 9%  |
| Registered Nurse - Primary Care                   | 75                           | 15% | 4                              | 17% |
| Province                                          |                              |     |                                |     |
| British Columbia                                  | 55                           | 11% | 9                              | 39% |
| Alberta                                           | 149                          | 30% | 14                             | 61% |
| Saskatchewan and Manitoba                         | 56                           | 11% |                                | N/A |
| Ontario                                           | 168                          | 33% |                                |     |
| Quebec                                            | 17                           | 3%  |                                |     |
| Maritimes*                                        | 47                           | 9%  |                                |     |
| Territories*                                      | 11                           | 2%  |                                |     |
| Location of practice                              |                              |     |                                |     |
| Urban                                             | 296                          | 58% |                                | N/C |
| Rural                                             | 125                          | 25% |                                |     |
| Urban and rural                                   | 86                           | 17% |                                |     |
| Proportion of all patients who are pregnant women |                              |     |                                |     |
| <10%                                              | 103                          | 20% |                                | N/C |
| 10-30%                                            | 94                           | 19% |                                |     |
| 30-60%                                            | 119                          | 23% |                                |     |
| 60-90%                                            | 46                           | 9%  |                                |     |
| >90%                                              | 146                          | 29% |                                |     |
| Stage of pregnancy at first visit                 |                              |     |                                |     |
| Before pregnancy                                  | 30                           | 6%  |                                | N/C |
| First trimester                                   | 328                          | 65% |                                |     |
| Second trimester                                  | 74                           | 15% |                                |     |
| Third trimester                                   | 34                           | 7%  |                                |     |
| Don't know/too variable to say                    | 41                           | 8%  |                                |     |

\*Maritimes=Newfoundland and Labrador, New Brunswick, Nova Scotia

\*Territories=Northwest Territories, Yukon Territory (no respondents from Nunavut)

N/A=Not applicable

N/C=Data not collected

Table 2. Survey responses regarding gestational weight gain counselling practices routinely undertaken (with >90% of pregnant patients) by Canadian health care providers.

|                                                                                                                            | Health care provider discipline <sup>1</sup> |     |     |     |    |     |    |     |    |     | All |     |
|----------------------------------------------------------------------------------------------------------------------------|----------------------------------------------|-----|-----|-----|----|-----|----|-----|----|-----|-----|-----|
|                                                                                                                            | GP                                           |     | OB  |     | MW |     | NP |     | RN |     |     |     |
|                                                                                                                            | n                                            | %   | n   | %   | n  | %   | n  | %   | n  | %   | n   | %   |
| I provide women with a weight gain target based on their pre-pregnancy BMI                                                 |                                              |     |     |     |    |     |    |     |    |     |     |     |
|                                                                                                                            | 27                                           | 17% | 35  | 25% | 23 | 24% | 8  | 21% | 15 | 21% | 108 | 21% |
|                                                                                                                            | Missing                                      |     |     |     |    |     |    |     |    |     | 4   | 1%  |
| I discuss the recommended rate of weight gain based on their weight gain target                                            |                                              |     |     |     |    |     |    |     |    |     |     |     |
|                                                                                                                            | 22                                           | 14% | 19  | 14% | 15 | 16% | 11 | 29% | 15 | 21% | 82  | 16% |
|                                                                                                                            | Missing                                      |     |     |     |    |     |    |     |    |     | 6   | 1%  |
| I discuss the impact of inappropriate weight gain on the mother during pregnancy                                           |                                              |     |     |     |    |     |    |     |    |     |     |     |
|                                                                                                                            | 22                                           | 14% | 33  | 24% | 21 | 22% | 13 | 34% | 11 | 15% | 100 | 20% |
|                                                                                                                            | Missing                                      |     |     |     |    |     |    |     |    |     | 4   | 1%  |
| I discuss the impact of inappropriate weight gain on the baby                                                              |                                              |     |     |     |    |     |    |     |    |     |     |     |
|                                                                                                                            | 21                                           | 13% | 30  | 22% | 21 | 22% | 15 | 40% | 10 | 14% | 97  | 19% |
|                                                                                                                            | Missing                                      |     |     |     |    |     |    |     |    |     | 7   | 1%  |
| I weigh women at every visit                                                                                               |                                              |     |     |     |    |     |    |     |    |     |     |     |
|                                                                                                                            | 146                                          | 92% | 122 | 88% | 34 | 35% | 32 | 84% | 47 | 65% | 381 | 76% |
|                                                                                                                            | Missing                                      |     |     |     |    |     |    |     |    |     | 4   | 1%  |
| I relay weight gain information to women every time I weigh them                                                           |                                              |     |     |     |    |     |    |     |    |     |     |     |
|                                                                                                                            | 82                                           | 52% | 62  | 45% | 38 | 40% | 25 | 66% | 41 | 57% | 248 | 50% |
|                                                                                                                            | Missing                                      |     |     |     |    |     |    |     |    |     | 7   | 1%  |
| I discuss appropriate physical activity with pregnant women                                                                |                                              |     |     |     |    |     |    |     |    |     |     |     |
|                                                                                                                            | 75                                           | 48% | 53  | 38% | 61 | 64% | 20 | 53% | 22 | 31% | 231 | 46% |
|                                                                                                                            | Missing                                      |     |     |     |    |     |    |     |    |     | 7   | 1%  |
| I discuss appropriate extra food requirements with pregnant women                                                          |                                              |     |     |     |    |     |    |     |    |     |     |     |
|                                                                                                                            | 41                                           | 26% | 26  | 19% | 37 | 39% | 14 | 37% | 21 | 30% | 139 | 28% |
|                                                                                                                            | Missing                                      |     |     |     |    |     |    |     |    |     | 7   | 1%  |
| I can easily give examples of appropriate changes that women could make to meet extra food requirements                    |                                              |     |     |     |    |     |    |     |    |     |     |     |
|                                                                                                                            | 40                                           | 26% | 30  | 22% | 48 | 50% | 17 | 46% | 23 | 32% | 158 | 32% |
|                                                                                                                            | Missing                                      |     |     |     |    |     |    |     |    |     | 9   | 2%  |
| I discuss the importance of taking prenatal vitamins                                                                       |                                              |     |     |     |    |     |    |     |    |     |     |     |
|                                                                                                                            | 124                                          | 79% | 85  | 61% | 49 | 51% | 34 | 90% | 44 | 61% | 336 | 67% |
|                                                                                                                            | Missing                                      |     |     |     |    |     |    |     |    |     | 6   | 1%  |
| <sup>1</sup> GP=General Practitioner, OB=Obstetrician, MW=midwife, NP=Nurse Practitioner, RN=Primary Care Registered Nurse |                                              |     |     |     |    |     |    |     |    |     |     |     |

Table 3. Composite scores for gestational weight gain counselling practices and influences on practices compared by health care provider discipline

|                                                                                           | Health care provider discipline <sup>1</sup> |                |                |                |                | All            | Sig.   | Post-hoc                         |
|-------------------------------------------------------------------------------------------|----------------------------------------------|----------------|----------------|----------------|----------------|----------------|--------|----------------------------------|
|                                                                                           | GP                                           | OB             | MW             | NP             | RN             |                |        |                                  |
| Providing weight gain advice and discussing the risks                                     | 2.95<br>(1.1)                                | 3.03<br>(1.2)  | 2.95<br>(1.2)  | 2.91<br>(1.5)  | 2.54<br>(1.3)  | 2.91<br>(1.2)  | 0.072  | N/A                              |
| Weighing women at every visit                                                             | 4.87<br>(0.54)                               | 4.75<br>(0.80) | 3.36<br>(1.56) | 4.61<br>(1.10) | 4.03<br>(1.55) | 4.41<br>(1.22) | <0.001 | MW < All**                       |
| Discussing physical activity and food requirements                                        | 3.65<br>(1.1)                                | 3.37<br>(1.1)  | 4.23<br>(0.8)  | 3.81<br>(1.1)  | 3.31<br>(1.4)  | 3.65<br>(1.1)  | <0.001 | MW > (GP, OB, RN)**              |
| General knowledge in GWG, physical activity, and nutrition                                | 3.50<br>(0.75)                               | 3.61<br>(0.75) | 3.77<br>(0.70) | 3.42<br>(0.80) | 3.36<br>(0.94) | 3.56<br>(0.78) | 0.017  | MW > RN*                         |
| Detailed knowledge of GWG, physical activity, and nutrition guidelines                    | 2.85<br>(0.98)                               | 2.96<br>(0.91) | 3.22<br>(0.88) | 2.85<br>(1.02) | 3.00<br>(1.01) | 2.97<br>(0.95) | 0.047  | MW > GP*                         |
| Priority level of discussing, assessing, and assisting women with appropriate weight gain | 4.09<br>(0.61)                               | 3.82<br>(0.82) | 3.59<br>(0.86) | 3.8<br>(0.87)  | 4.25<br>(0.65) | 3.89<br>(0.78) | <0.001 | MW < (GP, NP)**<br>OB- (GP, NP)* |

<sup>1</sup>GP=General Practitioner, OB=Obstetrician, MW=midwife, NP=Nurse Practitioner, RN=Primary Care Registered Nurse; \*Significant at 0.05; \*\*Significant at 0.01; Scale of 1=lowest to 5=highest score  
Compared by one-way ANOVA

Table 4. Overarching categories and key concepts emerging from qualitative content analysis of interviews with health care providers.

| Category                                | Concept                                                                             | Representative quote(s)                                                                                                                                                                                                                                                                                                                                                                                                                                                                                                                             |
|-----------------------------------------|-------------------------------------------------------------------------------------|-----------------------------------------------------------------------------------------------------------------------------------------------------------------------------------------------------------------------------------------------------------------------------------------------------------------------------------------------------------------------------------------------------------------------------------------------------------------------------------------------------------------------------------------------------|
| Practices                               | The first visit involves a large amount of information sharing                      | <p>“That’s the trouble with prenatal care. There’s so much information that women need, especially in the first trimester. Genetic screening, and lifestyle, and alcohol, and smoking, and family, and you know, on and on and on.”</p> <p>- General Practitioner</p>                                                                                                                                                                                                                                                                               |
|                                         | Weight is assessed routinely, but not discussed in detail unless there is a concern | <p>“Weight is something I would bring up with everyone at the first visit and only - well, I always check the weight every single other visit. But if there's no problem, I wouldn't bring it up. I might make a comment like, ‘Oh, your weight looks good.’”</p> <p>- General Practitioner</p>                                                                                                                                                                                                                                                     |
|                                         | Midwives have a different approach to gestational weight gain                       | <p>“We are aware of their weight gain. But more important to us than their weight gain is their nutrition and how they're feeling about it and, you know, providing encouragement, support and education so that they can be empowered to make healthy choices.”</p> <p>- Midwife</p> <p>“I feel like it’s really important to discuss healthy eating and exercise, but the actual focus on the weight gain and the number of pounds that a woman should gain, I don’t really feel that’s important at all, that piece of it.”</p> <p>- Midwife</p> |
| Individual level influences on practice | Priority level                                                                      | <p>“But certainly there are definitely times where I feel constricted by time. I think nutrition and exercise is a huge priority, so that's just my personal opinion. I think that I wouldn't - I don't know, I would make the time.”</p> <p>- Midwife</p>                                                                                                                                                                                                                                                                                          |
|                                         | Sensitivity of the discussion                                                       | <p>“Any discussion around weight can be a very charged issue and, depending on the woman and her BMI, and her history, she may have had a history of an eating disorder or whatever. You don’t always know what issues she’s had in the past and they can be very significant, so there could be a lot of anxiety on the patient’s side around weight gain and so that will always cover a conversation, especially if you don’t know her very well.”</p> <p>- General Practitioner, British Columbia</p>                                           |
|                                         | General knowledge of gestational weight gain, nutrition, and                        | <p>“I do find that nutrition is not covered at all in my medical school and through residency. I don’t remember any teaching sessions at all on weight gain in pregnancy, obesity in pregnancy or that. We have one teaching session</p>                                                                                                                                                                                                                                                                                                            |

|    |                    |                                                                  |
|----|--------------------|------------------------------------------------------------------|
| 1  |                    |                                                                  |
| 2  |                    |                                                                  |
| 3  |                    |                                                                  |
| 4  | physical activity  | every two years for an hour on it.”                              |
| 5  |                    | - Obstetrician                                                   |
| 6  |                    | “I have to know so many rules about all sorts of things. I       |
| 7  |                    | always kind of go by, you know, 5, 10, 15. So those three        |
| 8  |                    | numbers I remember, 5, 10, 15. If you're overweight, if          |
| 9  | Detailed knowledge | your BMI is higher than, you know, 26 or 27, or higher           |
| 10 | of practice        | than 28 or so, I would say, 5 kilos. If your weight is pretty    |
| 11 | guidelines         | well normal I'd say 10 kilos. And if your weight is under I'd    |
| 12 |                    | say 15 kilos.”                                                   |
| 13 |                    | - General Practitioner                                           |
| 14 |                    |                                                                  |
| 15 |                    | “And that's a different model for us because we're not           |
| 16 |                    | billing per fee code. So when I see a woman, I can talk to       |
| 17 |                    | her or counsel her or do anything in that visit, it doesn't –    |
| 18 |                    | so, it's different than the physicians, I guess, because they're |
| 19 |                    | constrained by billing for what they're talking to the people    |
| 20 |                    | about.”                                                          |
| 21 | Time and           | - Midwife                                                        |
| 22 | compensation       |                                                                  |
| 23 |                    | “I guess the biggest structural problem is the short prenatal    |
| 24 |                    | visit and the amount of information that has to be gathered      |
| 25 |                    | and disseminated in that visit, which is typically anything      |
| 26 | System             | from ten to 15 minutes long.”                                    |
| 27 | level              | - General Practitioner                                           |
| 28 | influences         |                                                                  |
| 29 | on                 |                                                                  |
| 30 | practice           |                                                                  |
| 31 |                    | <i>“So I find the most successful story of patients</i>          |
| 32 |                    | <i>achieving their [weight] goals and continuing</i>             |
| 33 |                    | <i>postpartum, were women who I initially brought</i>            |
| 34 |                    | <i>up the topic [with], referred to our dietitian and</i>        |
| 35 | Access to allied   | <i>psychologist and they [women] continued to</i>                |
| 36 | health services    | <i>follow up with me and with them. So they had that</i>         |
| 37 |                    | <i>longer term follow-up and this goal setting and</i>           |
| 38 |                    | <i>checking in with someone.”</i>                                |
| 39 |                    |                                                                  |
| 40 |                    | - Obstetrician                                                   |
| 41 |                    |                                                                  |
| 42 |                    |                                                                  |
| 43 |                    |                                                                  |
| 44 |                    |                                                                  |
| 45 |                    |                                                                  |
| 46 |                    |                                                                  |
| 47 |                    |                                                                  |
| 48 |                    |                                                                  |
| 49 |                    |                                                                  |
| 50 |                    |                                                                  |
| 51 |                    |                                                                  |
| 52 |                    |                                                                  |
| 53 |                    |                                                                  |
| 54 |                    |                                                                  |
| 55 |                    |                                                                  |
| 56 |                    |                                                                  |
| 57 |                    |                                                                  |
| 58 |                    |                                                                  |
| 59 |                    |                                                                  |
| 60 |                    |                                                                  |

Table 5. Predictors of Canadian health care providers providing advice to pregnant women about gestational weight gain and discussing risks of inappropriate weight gain during a prenatal visit.

| Variable                                                                                  | Model <sup>1</sup> |                 |          |
|-------------------------------------------------------------------------------------------|--------------------|-----------------|----------|
|                                                                                           | Unstd $\beta$      | S.E. of $\beta$ | Std Beta |
| (Constant)                                                                                | -1.14**            | 0.38            |          |
| General practitioner ( <i>reference</i> )                                                 |                    |                 |          |
| Obstetrician                                                                              | 0.242              | 0.145           | 0.093    |
| Midwife                                                                                   | -0.076             | 0.199           | -0.026   |
| Primary care RN                                                                           | -0.029             | 0.177           | -0.008   |
| Nurse Practitioner                                                                        | -0.057             | 0.206           | -0.012   |
| Detailed knowledge of GWG, physical activity, and nutrition guidelines                    | 0.26**             | 0.069           | 0.202    |
| General knowledge in GWG, physical activity, and nutrition                                | 0.098              | 0.081           | 0.065    |
| Priority level of discussing, assessing, and assisting women with appropriate weight gain | 0.71**             | 0.071           | 0.459    |
| Role (I am the most appropriate provider to discuss gestational weight gain)              | 0.172              | 0.133           | 0.056    |
|                                                                                           | R <sup>2</sup>     | 0.392           |          |

\*p<0.05 \*\*p<0.01

<sup>1</sup>Model is adjusted for: urban/rural location, Proportion of all patients who are pregnant, and trimester of pregnancy at first visit.

Unstd=Unstandardized, S.E.=Standard Error, Std=Standardized



Table 6. Predictors of Canadian health care providers discussing physical activity and food requirements with women as part of a prenatal visit.

| Variable                                                                                  | Model <sup>1</sup> |                 |          |
|-------------------------------------------------------------------------------------------|--------------------|-----------------|----------|
|                                                                                           | Unstd $\beta$      | S.E. of $\beta$ | Std Beta |
| (Constant)                                                                                | 0.688              | 0.345           |          |
| General practitioner ( <i>reference</i> )                                                 |                    |                 |          |
| Obstetrician                                                                              | 0.022              | 0.13            | 0.009    |
| Midwife                                                                                   | 0.518**            | 0.179           | 0.192    |
| Primary care RN                                                                           | 0                  | 0.160           | 0        |
| Nurse Practitioner                                                                        | 0.342              | 0.189           | 0.077    |
| Detailed knowledge of GWG, physical activity, and nutrition guidelines                    | 0.277**            | 0.063           | 0.229    |
| General knowledge in GWG, physical activity, and nutrition                                | 0.311**            | 0.073           | 0.22     |
| Priority level of discussing, assessing, and assisting women with appropriate weight gain | 0.341**            | 0.064           | 0.236    |
| Role (I am the most appropriate provider to discuss gestational weight gain)              | 0.18               | 0.12            | 0.063    |
|                                                                                           | R <sup>2</sup>     | 0.434           |          |

\*p<0.05 \*\*p<0.01

<sup>1</sup>Model is adjusted for: urban/rural location, proportion of all patients who are pregnant, and trimester of pregnancy at first visit

Unstd=Unstandardized, S.E.=Standard Error, Std=Standardized

# BMJ Open

## Health care provider's gestational weight gain counselling practices and the influence of knowledge and attitudes: A cross-sectional mixed methods study

|                                 |                                                                                                                                                                                                                                                                                                                                                                                                                                                                                                                                                                                             |
|---------------------------------|---------------------------------------------------------------------------------------------------------------------------------------------------------------------------------------------------------------------------------------------------------------------------------------------------------------------------------------------------------------------------------------------------------------------------------------------------------------------------------------------------------------------------------------------------------------------------------------------|
| Journal:                        | <i>BMJ Open</i>                                                                                                                                                                                                                                                                                                                                                                                                                                                                                                                                                                             |
| Manuscript ID                   | bmjopen-2017-018527.R1                                                                                                                                                                                                                                                                                                                                                                                                                                                                                                                                                                      |
| Article Type:                   | Research                                                                                                                                                                                                                                                                                                                                                                                                                                                                                                                                                                                    |
| Date Submitted by the Author:   | 08-Sep-2017                                                                                                                                                                                                                                                                                                                                                                                                                                                                                                                                                                                 |
| Complete List of Authors:       | Morris, Jillian; University of Alberta, Agricultural, Food and Nutritional Science<br>Nikolopoulos, Hara; University of Alberta, Agricultural, Food and Nutritional Science<br>Berry, Tanya; University of Alberta, Faculty of Physical Education and Recreation<br>Jain, Venu; University of Alberta, Department of Obstetrics & Gynecology<br>Vallis, Michael; Dalhousie University, Behaviour Change Institute, Dept of Family Medicine<br>Piccinini-Vallis, Helena; Dalhousie University, Family Medicine<br>Bell, R; University of Alberta, Agricultural, Food and Nutritional Science |
| <b>Primary Subject Heading</b>: | Obstetrics and gynaecology                                                                                                                                                                                                                                                                                                                                                                                                                                                                                                                                                                  |
| Secondary Subject Heading:      | General practice / Family practice                                                                                                                                                                                                                                                                                                                                                                                                                                                                                                                                                          |
| Keywords:                       | Pregnancy, Health Care, Gestational Weight Gain, Counselling                                                                                                                                                                                                                                                                                                                                                                                                                                                                                                                                |
|                                 |                                                                                                                                                                                                                                                                                                                                                                                                                                                                                                                                                                                             |

SCHOLARONE™  
Manuscripts

1  
2  
3 **1 Health care provider's gestational weight gain counselling practices and the influence of**  
4 **knowledge and attitudes: A cross-sectional mixed methods study**  
5  
6  
7  
8

9 4 Jill Morris<sup>1</sup>

10 5 Hara Nikolopoulos<sup>1</sup>

11 6 Tanya Berry<sup>2</sup>

12 7 Venu Jain<sup>3</sup>

13 8 Michael Vallis<sup>4</sup>

14 9 Helena Piccinini-Vallis<sup>5</sup>

15 10 Rhonda C Bell<sup>1</sup>

16 11 and the ENRICH team  
17  
18  
19  
20  
21  
22  
23

24 13 1. Department of Agricultural, Food and Nutritional Science, University of Alberta,  
25 Edmonton, Alberta, Canada, T6G 2E1

26 14 2. Faculty of Physical Education and Recreation, University of Alberta, 1-153 University  
27 Hall, Edmonton, Alberta, Canada, T6G 2J9

28 15 3. Department of Obstetrics & Gynecology, University of Alberta, 5S131 LHH, 10240  
29 Kingsway Ave., Edmonton, Alberta, Canada, T5H 3V9

30 16 4. Behaviour Change Institute, Dept of Family Medicine, Dalhousie University, Halifax,  
31 NS, Canada B3L 2C2

32 17 5. Department of Family Medicine, Dalhousie University, 5900 Veteran's Memorial Lane,  
33 Halifax, NS, Canada, B3H 2E2  
34  
35  
36  
37  
38

39 21 **Correspondence to:** Dr. Rhonda C Bell, 4-126 Li Ka Shing Centre for Health Innovation,  
40 University of Alberta, Edmonton, Alberta, Canada, T6G 2E1, [rhonda.bell@ualberta.ca](mailto:rhonda.bell@ualberta.ca),  
41 Telephone: 780-492-7742  
42

43 24 **Word count**

44 25 Manuscript: 3866  
45  
46  
47  
48  
49  
50  
51  
52

53 29  
54 30 **Keywords:** Pregnancy, health care, gestational weight gain, counselling (*3-5 keywords*)  
55  
56  
57  
58  
59  
60

1  
2  
3 31 **Abstract**  
4  
5  
6

7 32 **Objective:** To understand current gestational weight gain (GWG) counselling practices of health  
8  
9 33 care providers, and the relationships between practices, knowledge and attitudes.

10  
11 34 **Design:** Concurrent mixed methods with data integration: cross-sectional survey and semi-  
12  
13 35 structured interviews.

14  
15  
16 36 **Participants:** Prenatal health care providers in Canada: general practitioners, obstetricians,  
17  
18 37 midwives, nurse practitioners, and registered nurses in primary care settings.

19  
20  
21 38 **Results:** Typically, GWG information was provided early in pregnancy, but not discussed again  
22  
23 39 unless there was a concern. Few routinely provided women with individualized GWG advice  
24  
25 40 (21%), rate of GWG (16%), or discussed the risks of inappropriate GWG to mother and baby  
26  
27 41 (20% and 19%). More routinely discussed physical activity (46%) and food requirements (28%);  
28  
29 42 midwives did these two activities more frequently than all other disciplines ( $p<0.001$ ).  
30  
31 43 Midwives interviewed noted a focus on overall wellness instead of weight, and had longer  
32  
33 44 appointment times which allowed them to provide more in-depth counselling. Regression results  
34  
35 45 identified that the higher priority level that health care providers place on GWG, the more likely  
36  
37 46 they were to report providing GWG advice and discussing risks of GWG outside  
38  
39 47 recommendations ( $\beta=0.71$ ,  $p<0.001$ ) and discussing physical activity and food requirements  
40  
41 48 ( $\beta=0.341$ ,  $p<0.001$ ). Interview data linked the priority level of GWG to length of appointments,  
42  
43 49 financial compensation methods for health care providers, and the midwifery versus medical  
44  
45 50 model of care.

51  
52 51 **Conclusions:** Interventions for health care providers to enhance GWG counselling practices  
53  
54 52 should consider the range of factors that influence the priority level health care providers place  
55  
56 53 on GWG counselling.  
57  
58  
59  
60

54

**Strengths and Limitations Of This Study: (max 5 bullet points)**

- This is a large and in-depth examination and comparison of health care providers' practices related to monitoring and discussing GWG with pregnant women,
- This study is enhanced by the use of mixed methods. Mixed methods research is well suited for health services, which are complex and influenced by multiple factors.
- The findings from this study may have a wide applicability, as the topics covered in this survey are considered routine and are undertaken as part of standard prenatal care in most developed countries.
- It was not possible to calculate a true response rate for the survey since the survey was distributed using email lists and social media through professional associations and networks although these methods allowed for wider reach and more responses.
- Those who responded may be more likely to engage in activities related to GWG counselling which could lead to inflation of the reported frequency of specific GWG counselling practices.. Nevertheless, the rates of some counselling practices reported in this study are quite low.

70

71

## 72 **Introduction**

73 Supporting all women to achieve healthy gestational weight gain (GWG) is of clinical  
74 importance because GWG lower or higher than recommended is linked to a range of poor  
75 maternal, fetal, and childhood outcomes. [1] For mothers, excess GWG increases the risk of  
76 gestational diabetes mellitus and hypertensive disorders in pregnancy, and this is of special  
77 concern if excessive GWG occurs early in pregnancy. [2-4] Excess GWG also poses risks at  
78 delivery for the mother including increased likelihood of needing an instrumental delivery or a  
79 Caesarean section, and surgical morbidity and mortality. [1, 3] Further, these factors result in an  
80 increased risk for the fetus and neonate including the adverse consequences of macrosomia and  
81 shoulder dystocia, need for intensive care unit admission, and the risk of perinatal death. [1, 3]  
82 [5] In the long term, the child is at risk of an altered growth trajectory that may lead to obesity.  
83 [6, 7] Excess GWG also increases the risk of postpartum weight retention, which may leave a  
84 woman at an increased Body Mass Index (BMI) to begin her next pregnancy. [1] [8] The cycle of  
85 excess GWG followed by postpartum weight retention and increasing maternal BMI can lead to  
86 increased risk in each subsequent pregnancy.[9] These risks act synergistically resulting in a  
87 higher risk of metabolic and cardiovascular disease in later life for the mother as well as the  
88 child.[10] Thus, excess GWG has short term, long term and intergenerational effects. [11]

89 To mitigate the risks of inappropriate GWG, many countries, including Canada, have released  
90 GWG guidelines. [12] [13] Many of these are based on the Institute of Medicine (USA)  
91 guidelines for GWG in pregnancy, which outline a range of total GWG over the course of  
92 pregnancy that is associated with optimal health outcomes for mother and child. [14] In order for  
93 these guidelines to be of benefit to pregnant women, the Institute of Medicine recommends that  
94 health care providers advise women on the recommended range of GWG based on pre-

1  
2  
3 95 pregnancy BMI, and that they track and discuss weight progress over the course of pregnancy, as  
4  
5 96 well as offering tailored counselling on dietary intake and physical activity. [15] Many countries  
6  
7  
8 97 provide guidance to health care providers in the form of evidence-based guidelines in order to  
9  
10 98 support them in providing physical activity and nutrition counselling to pregnant women. [16]  
11  
12  
13 99 [17-19]

14  
15  
16 100 There is growing evidence to suggest that the quality of GWG counselling interactions needs  
17  
18 101 improvement, as women and health care providers report conflicting views of these interactions.  
19  
20 102 [20] Many women report that their health care provider did not provide recommendations for  
21  
22  
23 103 GWG during their prenatal care, nor provide counselling about nutrition and physical activity  
24  
25 104 behaviours during pregnancy [21, 22] Health care providers have reported taking a reactive  
26  
27  
28 105 approach, initiating a discussion about weight in pregnancy only after weight exceeds the  
29  
30 106 recommendations. [23, 24] Health care providers may lack knowledge or skills to undertake this  
31  
32  
33 107 type of counselling[25] [26], or consider GWG to be a low priority in the context of a typical  
34  
35 108 prenatal visit.[23]

36  
37 109  
38  
39  
40 110 Women may see a variety of health care provider disciplines for prenatal care including general  
41  
42 111 practitioners, obstetricians, midwives, nurse practitioners, and registered nurses. [27] There is  
43  
44 112 some evidence to suggest that the approach to GWG counselling may vary by health care  
45  
46  
47 113 provider discipline [28, 29]; however, this area has not been fully explored. In order to better  
48  
49 114 support health care providers to have positive GWG counselling interactions with women, there  
50  
51 115 needs to be a detailed understanding of current practices, and what is influencing these practices.  
52  
53  
54 116 This information can be used to develop interventions to promote appropriate GWG in routine  
55  
56 117 prenatal care. As such, the objectives of this study were to characterize and compare the GWG  
57  
58  
59  
60

1  
2  
3 118 counselling practices of health care providers who provide prenatal care; and to examine  
4  
5  
6 119 potential influences on advice and counselling practices.  
7

8 120

9  
10  
11 121 **Methods**

12  
13 122 Study design

14  
15  
16 123 This study was conducted using a concurrent mixed methods design, consisting of an online  
17  
18 124 survey and semi-structured qualitative interviews. Qualitative and quantitative data were  
19  
20  
21 125 collected in tandem, analyzed separately, and integrated.[30] Mixed methods research is well  
22  
23 126 suited for research questions that call for real-life contextual understandings and multi-level  
24  
25 127 influences, and lends itself well to the development of complex interventions. [31]  
26  
27

28 128

29  
30 129 Ethics approval for this study was obtained from the Health Research Ethics Board at the  
31  
32 130 University of Alberta (Study Identification Pro00045899). All participants provided informed  
33  
34 131 consent to participate in this study.  
35  
36

37 132

38  
39 133 Quantitative methods

40  
41 134 *Survey development*

42  
43  
44 135 A survey questionnaire was developed, pilot-tested, and assessed for content validity by a team  
45  
46 136 of researchers with expertise in the areas of obstetrics, nutrition, exercise physiology, health  
47  
48 137 promotion, and health psychology (Supplementary file).  
49  
50

51 138 *Recruitment and data collection*

52  
53  
54 139 Health care providers including general practitioners, obstetricians, midwives, nurse  
55  
56 140 practitioners, and registered nurses in primary care settings from across Canada were recruited  
57  
58  
59  
60



1  
2  
3 141 through professional associations and networks who agreed to distribute survey information to  
4  
5 142 their members. All health care providers who provided prenatal care were eligible to participate.  
6  
7  
8 143 The survey was available from December 2014 to May 2015 on Research Electronic Data  
9  
10 144 Capture (REDCap) software hosted at the University of Alberta.[32]  
11

### 12 145 *Outcomes*

13  
14  
15 146 Survey participants provided information about their professional characteristics, and were asked  
16  
17 147 to respond to questions regarding their practices, knowledge, and attitudes related to GWG,  
18  
19  
20 148 nutrition and physical activity. Specifically, participants were asked about the proportion of their  
21  
22 149 pregnant patients with whom they undertook selected GWG counselling practices as outlined in  
23  
24 150 the Institute of Medicine recommendations[15], using a scale from 1 (<10% of pregnant patients)  
25  
26 151 to 5 (>90% of pregnant patients). Respondents were also asked for their self-assessment of their  
27  
28 152 general knowledge to support GWG counselling, their detailed knowledge of the content of  
29  
30 153 practice guidelines related to GWG (specifically the IOM/Health Canada GWG guidelines[33],  
31  
32 154 and Health Canada's nutrition guidelines[34] and physical activity guidelines[35]), and the  
33  
34 155 priority level they placed on discussing, assessing, and assisting women with GWG (e.g., *Given*  
35  
36 156 *all the issues of concern during a typical prenatal visit, I consider discussing GWG a high*  
37  
38 157 *priority*). Responses indicated level of agreement with each statement on a scale from 1  
39  
40 158 (strongly disagree) to 5 (strongly agree). The survey also examined whether health care  
41  
42 159 providers considered themselves to be the most appropriate person within their practice setting to  
43  
44 160 provide GWG counselling (*I am the most appropriate provider in my practice setting to discuss*  
45  
46 161 *GWG*).  
47

### 48 162 49 50 51 163 *Data analysis*

1  
2  
3 164 GWG counselling practices of each health care provider group were calculated as frequency and  
4  
5 165 percentage of responses, dichotomized into “Routine (undertaken with >90% of pregnant  
6  
7 166 patients)” and “Not routine” (all other response choices) based on the Institute of Medicine  
8  
9 167 recommendations that these practices occur with every woman (IOM, 2013).[15] Cases with  
10  
11 168 missing data were removed from analyses. Principal components analysis was used to reduce  
12  
13 169 the numerous survey questions into a smaller number of factors. The mean score of the items  
14  
15 170 loading onto each factor was used to represent that factor score for respondents. [36] For  
16  
17 171 example, four questions loaded onto a factor that was named “Providing Weight Gain Advice  
18  
19 172 and Discussing Risks” and were averaged together into a composite score for that factor. Mean  
20  
21 173 scores were calculated for the remaining factors of General Knowledge, Detailed Knowledge of  
22  
23 174 Practice Guidelines, and the Priority Level Health Care Providers Place on GWG, in a similar  
24  
25 175 manner. Differences in mean composite scores were compared among health care provider  
26  
27 176 disciplines using one-way ANOVA) with Bonferroni post-hoc tests; residuals for all composite  
28  
29 177 scores were normally distributed. Mean scores for each factor were used in multiple linear  
30  
31 178 regression models to evaluate the relationship between the predictors of interest and GWG  
32  
33 179 counselling practices. For all models, multicollinearity was not an issue with all tolerance values  
34  
35 >0.36 and variance inflation factors <2.8.  
36  
37  
38  
39  
40  
41  
42  
43  
44

## 182 Qualitative methods

### 183 *Materials*

184 A semi-structured interview guide was developed by the study team based on the study  
185 objectives and included questions and prompts regarding health care provider practices in

1  
2  
3 186 relation to GWG, as well as the reasons behind these practices. The interview guide also  
4  
5 187 included questions regarding provider knowledge in and attitudes towards GWG.  
6  
7  
8 188

9  
10 189 *Recruitment and data collection*  
11

12 190 Potential participants were identified through collaborating members of the study team. A  
13  
14 191 purposive sample of maximum variation was recruited to gather the perspectives of health care  
15  
16 192 providers from the different disciplines practicing in urban or rural locations in two Canadian  
17  
18 193 provinces (Alberta and British Columbia). When these contacts were exhausted, an advertisement  
19  
20 194 was distributed by email to medical clinics relevant to the requirements for variability in the sample.  
21  
22 195 Interviews were conducted over the telephone, audio-recorded and transcribed verbatim.  
23  
24  
25 196

26  
27  
28  
29 197 *Data analysis*  
30

31 198 Qualitative content analysis was used to describe and inductively interpret the data.[37, 38]  
32  
33 199 Qualitative content analysis is a process that is a “reduction and sense making effort that takes a  
34  
35 200 volume of qualitative material and attempts to identify core consistencies and meanings”. [39](p.45)  
36  
37 201 Audio recordings and transcripts were reviewed, and reviewed again while making notes about  
38  
39 202 key words and phrases. Key concepts were categorized and re-categorized as patterns emerged.  
40  
41 203 Data analysis occurred concurrently with data collection, and sampling adequacy was  
42  
43 204 demonstrated by saturation of the data, as replication occurred in categories as new participants  
44  
45 205 were included in the analysis.[40] Findings were discussed and approved by the study team.  
46  
47  
48  
49

50 206

51  
52 207 Data integration  
53  
54  
55  
56  
57  
58  
59  
60

1  
2  
3 208 The categories emerging inductively from the interviews were compared with the results from  
4  
5 209 the quantitative survey to determine if findings from each method confirmed the other, as well as  
6  
7  
8 210 to expand the strength of each type of data to better explain the phenomenon.[41]  
9

10 211

## 14 212 **Results**

### 16 213 Participant characteristics

18 214 Overall, 1189 health care providers responded to the survey. Of these, 122 did not meet the  
19  
20  
21 215 eligibility criteria (i.e. did not see pregnant women in their practice), 27 did not specify their  
22  
23 216 health care provider discipline, 155 did not answer any questions beyond practice characteristics,  
24  
25 217 and 377 indicated a health care provider discipline that was outside the scope of these analyses.  
26  
27  
28 218 Thus, 508 responses from general practitioners, obstetricians, midwives, nurse practitioners and  
29  
30 219 registered nurses in primary care settings from across Canada are included in this analysis (Table  
31  
32  
33 220 1). Twenty-three health care providers from these same disciplines participated in the interviews.  
34

35 221

### 37 222 Gestational weight gain counselling practices of health care providers

#### 40 223 *Providing weight gain advice and discussing risks*

42 224 A small proportion of health care providers routinely provided women with a GWG target based  
43  
44 225 on their pre-pregnancy BMI and discussed the recommended rate of GWG based on their GWG  
45  
46  
47 226 target (21% and 16%; Table 2). Few indicated that they routinely discussed the impacts of  
48  
49 227 inappropriate GWG on mother (20%) and baby (19%). The composite score for “Providing  
50  
51 228 weight gain advice and discussing the risks” did not differ between health care provider  
52  
53  
54 229 disciplines (Table 3).

56 230

1  
2  
3 231 Key concepts and quotes relating to counselling practices that emerged from the interviews are  
4  
5 232 outlined in Table 4. Interviewees described the first prenatal visit as including measurement of  
6  
7  
8 233 weight, calculation of BMI, and a large amount of information sharing, including general  
9  
10 234 information on GWG. Some health care providers advised women on a total GWG target;  
11  
12 235 however, this was not always congruent with guidelines. The amount of information provided in  
13  
14 236 the first visit was perceived by the health care providers to be overwhelming for women.  
15  
16  
17 237

18  
19  
20 238 *Weight assessment*

21  
22 239 Approximately three-quarters of respondents weighed women at every visit (76%), while half of  
23  
24 240 respondents would routinely relay GWG information to women every time they are weighed  
25  
26  
27 241 (Table 2). Midwives reported measuring weight at every visit less frequently than all other  
28  
29 242 disciplines (Table 3).  
30  
31

32 243  
33  
34 244 Interviewees noted that weight was typically measured at each visit, except for midwives who  
35  
36 245 generally measured women's weight if clinically necessary, or if women requested them to do so  
37  
38 246 (Table 4). After the first visit, interview participants indicated that they revisited the topic to  
39  
40 247 varying levels of depth, typically only when the health care provider or woman expressed  
41  
42 248 concern about her weight.  
43  
44  
45

46 249

47  
48 250 *Discussing physical activity and food requirements*

49  
50 251 Nearly half (46%) of health care providers reported routinely discussing physical activity with  
51  
52 252 women while about one-third routinely discussed appropriate extra food requirements (28%),  
53  
54  
55 253 and only about one-third felt they could routinely give examples of appropriate changes that  
56  
57  
58  
59  
60

1  
2  
3 254 women could make to meet extra food requirements (32%) (Table 2). In contrast, over two-  
4  
5 255 thirds would discuss the importance of prenatal vitamins (67%). The composite score for the  
6  
7  
8 256 three survey questions regarding discussing physical activity and food requirements differed  
9  
10  
11 257 between health care provider disciplines (Table 3). Midwives did this more frequently than all  
12  
13 258 other disciplines except for nurse practitioners.

14  
15 259  
16  
17 260 Health care providers of all disciplines described providing general information on GWG,  
18  
19  
20 261 physical activity, and nutrition in the early stages of pregnancy, and many indicated providing  
21  
22 262 women with printed resources in this area (Table 4). The midwives interviewed described  
23  
24 263 spending more time assessing women's current lifestyle and providing individualized advice  
25  
26  
27 264 than did physicians (Table 4).

28  
29 265

### 30 31 32 266 Predictors of counselling practices

33  
34 267 Health care providers, regardless of discipline, reported similar responses for having appropriate  
35  
36 268 general knowledge of GWG, physical activity, and nutrition, as well as knowledge of related  
37  
38  
39 269 practice guidelines (Table 3); only the difference between midwives and registered nurses  
40  
41 270 responses was significant. There were significant differences in the level of priority placed on  
42  
43 271 GWG. Midwives and obstetricians had lower composite scores for the priority level they place  
44  
45  
46 272 on GWG than general practitioners and nurse practitioners, but did not differ significantly from  
47  
48 273 each other (Table 3). The majority of health care providers considered discussing GWG with  
49  
50  
51 274 women to be within their role (77%).

52  
53 275

### 54 55 276 *Predictors of providing weight gain advice and discussing risks*

1  
2  
3 277 The composite score for providing weight gain advice and discussing risks of inappropriate  
4  
5 278 GWG was most strongly related to the priority level that health care providers placed on GWG  
6  
7  
8 279 (Table 5), followed by their detailed knowledge of GWG, physical activity, and nutrition  
9  
10 280 guidelines.  
11

12 281  
13  
14  
15 282 Generally, health care providers in the interviews reported that GWG discussions may receive  
16  
17 283 lower priority due to the time constraints in a typical appointment (Table 4). This was related to  
18  
19  
20 284 their compensation method, as general practitioners and obstetricians were remunerated in a fee-  
21  
22 285 for-service model that resulted in restriction on the length of appointments, as well as the topics  
23  
24 286 covered. Midwives were compensated by course-of-care, which resulted in longer and more  
25  
26  
27 287 flexible appointments. However, midwives described a lower priority level placed on GWG, as  
28  
29 288 their practice was less focussed on weight, in particular weight assessment, and more focussed  
30  
31 289 on a woman's overall health and wellbeing. Health care providers' perceptions of the sensitivity  
32  
33 290 of discussing GWG with pregnant women were also related to their providing weight gain advice  
34  
35 291 and discussing risks (Table 4). Some health care providers noted their discomfort with initiating  
36  
37 292 GWG discussions, or discussing GWG too frequently, as they were concerned that this may  
38  
39 293 cause psychological distress for the woman.  
40  
41  
42

43 294

#### 44 295 *Predictors of discussing physical activity and food requirements*

45  
46 296 The priority level that health care providers place on GWG, their detailed knowledge of GWG,  
47  
48 297 nutrition, and physical activity guidelines, and their general knowledge of this area were all  
49  
50  
51 298 significantly related to their discussing physical activity and food requirements with women  
52  
53  
54  
55  
56  
57  
58  
59  
60

1  
2  
3 299 during a prenatal visit (Table 6). After adjustment for practice characteristics, being a midwife  
4  
5 300 remained a significant predictor of this activity within a prenatal visit.  
6  
7

8 301  
9  
10 302 Midwifery practices in relation to discussing physical activity and food requirements also  
11  
12 303 emerged from the interview data (Table 4). Midwives reported that their approach focussed on  
13  
14 304 overall health and wellness, and centred on support for women. Knowledge was another key  
15  
16 305 factor that came to light in the interviews, as some health care providers noted a need for  
17  
18 306 additional knowledge, particularly in nutrition and maternal obesity. For health care providers  
19  
20 307 working within a multidisciplinary team, access to dietetic services was an important  
21  
22 308 enhancement to GWG counselling practices.  
23  
24  
25  
26

27 309

## 30 310 **Discussion**

31  
32 311 GWG counselling by health care providers falls below the recommendations from the Institute of  
33  
34 312 Medicine and other national health agencies. [15] Although many of the health care providers  
35  
36 313 interviewed indicated that they regularly calculate and record women's pre-pregnancy BMI, few  
37  
38 314 survey respondents from any discipline routinely provided women with a comprehensive GWG  
39  
40 315 recommendation and advice on their rate of GWG based on their pre-pregnancy BMI. In  
41  
42 316 addition, few survey respondents reported discussing the risks of inappropriate GWG with  
43  
44 317 women. While many health care providers reported providing a general message of the  
45  
46 318 importance of prenatal vitamins, fewer reported routinely discussing topics such as appropriate  
47  
48 319 extra food requirements. Weight was typically measured at each prenatal appointment, but not  
49  
50 320 discussed unless it was a concern. This is in contrast with what women report they need from  
51  
52 321 their health care provider, as other studies from our research group have indicated that women  
53  
54  
55  
56  
57  
58  
59  
60



1  
2  
3 322 would like their health care provider to initiate a discussion about GWG early in pregnancy, and  
4  
5 323 continue the discussions throughout pregnancy and postpartum so that they are updated on their  
6  
7  
8 324 GWG progress. [22]  
9

10 325  
11  
12 326 The low rates of some of these counselling practices are concerning since it is possible that  
13  
14 327 survey respondents are those most likely to counsel women about GWG. There is evidence  
15  
16 328 suggesting that women who's health care providers discuss GWG and related lifestyle  
17  
18 329 behaviours in pregnancy with them have lower GWG and lower likelihood of having a baby that  
19  
20 330 is large for gestational age. [42-44] This underlines the potential level of influence that health  
21  
22 331 care providers have with pregnant women and the importance of refining health care providers  
23  
24 332 training or antenatal care pathways to support such conversations.  
25  
26  
27  
28

29 333  
30  
31 334 To our knowledge, this is the first mixed methods study to examine GWG counselling, in  
32  
33 335 particular for the specific counselling practices recommended by the Institute of Medicine.  
34  
35 336 While survey and qualitative research studies from various parts of the world have also found  
36  
37 337 low rates of GWG counselling as reported by patients, other surveys of health care providers  
38  
39 338 have found high self-reported rates of counselling.[20, 28] This discrepancy may due to the  
40  
41 339 frequency with which health care providers undertake counselling, as studies from the US have  
42  
43 340 found that health care providers report discussing GWG more often with women who are  
44  
45 341 overweight or obese to at the start of their pregnancy.[24] Therefore, they may report that they  
46  
47 342 provide GWG counselling, but not to every pregnant woman. Further, when the depth of this  
48  
49 343 counselling is explored, the self-reported rates are likely to diminish. Future studies should  
50  
51 344 objectively assess the quality of these discussions and evaluate their impact on GWG, health  
52  
53  
54  
55  
56  
57  
58  
59  
60

1  
2  
3 345 behaviours like physical activity and diet, and women's perceptions of support. Furthermore,  
4  
5 346 research is needed to elucidate the most effective counselling methods that will help women  
6  
7 347 achieve appropriate GWG. This additional information could help guide or refine approaches to  
8  
9 348 antenatal care undertaken by different groups of care providers.  
10  
11

12 349  
13  
14 350 This study identified multi-level influences on GWG counselling. Most notably, the priority  
15  
16 351 level that health care providers placed on GWG had the strongest relationship with their  
17  
18 352 practices. The qualitative results provided context to this finding, linking the priority level of  
19  
20 353 GWG to factors at the health care system level, such as the time available in a typical prenatal  
21  
22 354 appointment, and the compensation that health care providers receive for their time.  
23  
24

25  
26 355 Additionally, this study identified factors at the individual level. This included the importance of  
27  
28 356 detailed knowledge of practice guidelines, which also was strongly associated with counselling  
29  
30 357 practices.  
31  
32

33 358  
34  
35 359 One novel finding was the new insights into the different approach reported by midwives.  
36  
37 360 Midwives noted that their focus on the overall wellbeing of the women meant they discussed  
38  
39 361 physical activity and nutrition in more depth than did physicians, and they measured weight less  
40  
41 362 frequently. Even after controlling for multiple other predictors, midwives were significantly  
42  
43 363 more likely than other health care providers to report discussing physical activity and food  
44  
45 364 requirements with women during routine prenatal care. In other research, patients of midwives  
46  
47 365 were more likely to recall having discussed physical activity with their health care provider as  
48  
49 366 compared to patients of general practitioners and obstetricians,[29] and midwives themselves  
50  
51 367 report providing physical activity counselling to women more frequently than other  
52  
53  
54  
55  
56  
57  
58  
59  
60

1  
2  
3 368 disciplines.[20, 28] While the present study considered physical activity and nutrition  
4  
5 369 counselling practices as one composite score, there seems to be growing evidence that midwives  
6  
7  
8 370 provide more lifestyle counselling than other health care provider disciplines. The impact of  
9  
10 371 counselling by a midwife as compared to other disciplines on the health outcomes for women is  
11  
12 372 an area for future exploration.

13 373

### 14 15 16 17 374 *Strengths and Limitations*

18  
19  
20 375 A major strength of this study is the use of mixed research methods. This allowed for some  
21  
22 376 verification of findings between methods, and provided a broader picture of “who is doing  
23  
24 377 what”, as well as “why and how are they doing it”. To our knowledge, this is the largest and  
25  
26  
27 378 most comprehensive survey on this topic to date. While prenatal care varies between countries,  
28  
29 379 the topics covered in this survey are considered routine and are undertaken as part of standard  
30  
31 380 prenatal care in most developed countries.

32 381

33  
34  
35  
36 382 This study has limitations that should be considered. It was not possible to calculate a true  
37  
38 383 response rate for the survey since the survey was distributed using email lists and social media  
39  
40 384 through professional associations and networks. While this method of recruitment allowed for a  
41  
42 385 wider reach, and ultimately more responses, those who responded may be more likely to engage  
43  
44 386 in activities related to GWG counselling. This could lead to inflation of the reported frequency  
45  
46 387 of specific GWG counselling practices. This is concerning as they are already quite low for  
47  
48  
49 388 some counselling practices and further highlights the need for targeted interventions in this area.

50 389

1  
2  
3 390 The qualitative interviews were only conducted in two provinces, and there is the potential that  
4  
5 391 this does not accurately capture the practices and predictors in other geographic areas. However,  
6  
7  
8 392 the congruency of the qualitative and quantitative findings suggests that this is unlikely.  
9  
10 393 Furthermore, a recent systematic review found few differences in barriers and facilitators to  
11  
12 394 pregnancy weight management in studies from around the world, suggesting that the findings of  
13  
14 395 the current study may help inform practice in various health care systems.[45]  
15  
16  
17 396

19  
20 397 *Recommendations*

21  
22 398 Interventions to implement best practices should consider the multi-level influences on GWG  
23  
24 399 counselling practices, as well as the discipline of the health care provider, in order to be effective  
25  
26 400 at changing health care provider behaviours. Providers across disciplines require knowledge of  
27  
28 401 GWG, physical activity, and nutrition guidelines and some may need system-level changes such  
29  
30 402 as more time in an appointment to help them make it a priority in their practice. A different  
31  
32 403 model for dissemination of this knowledge needs consideration. Multidisciplinary clinics that  
33  
34 404 include professionals with a background in nutrition and physical activity, and group educational  
35  
36 405 sessions may be important in this regard. The latter approach could allow participants to discuss  
37  
38 406 these issues amongst themselves and may provide positive reinforcement of new knowledge and  
39  
40 407 help to shift old beliefs.[42] Furthermore, discussion of healthy GWG and maintenance of a  
41  
42 408 healthy weight trajectory with women by health providers is a missed opportunity for positive  
43  
44 409 feedback for a healthy and potentially long-term behaviour.  
45  
46  
47  
48  
49

50 410  
51  
52 411 Expanding discussions on GWG to a healthier lifestyle is highly relevant given the growing body  
53  
54 412 of evidence related to its impact on disease in later life.[10] Health care providers are well  
55  
56  
57  
58  
59  
60

1  
2  
3  
4  
5  
6  
7  
8  
9  
10  
11  
12  
13  
14  
15  
16  
17  
18  
19  
20  
21  
22  
23  
24  
25  
26  
27  
28  
29  
30  
31  
32  
33  
34  
35  
36  
37  
38  
39  
40  
41  
42  
43  
44  
45  
46  
47  
48  
49  
50  
51  
52  
53  
54  
55  
56  
57  
58  
59  
60

413 positioned to help women identify plans to help change behaviour and improve health outcomes.  
414 Strong communication between health care providers and pregnant women is a key component  
415 to moving forward. Supporting health care providers to better counsel their pregnant patients on  
416 appropriate GWG is one important step towards breaking the intergenerational cycle of obesity,  
417 and improving the health of generations to come.

418

For peer review only

419 **References**

- 420 1 Viswanathan M, Siega-Riz AM, Moos MK, et al. Outcomes of maternal weight gain.  
421 *Evid Rep Technol Assess* 2008(168):1-223.
- 422 2 Carreno CA, Clifton RG, Hauth JC, et al. Excessive early gestational weight gain and risk  
423 of gestational diabetes mellitus in nulliparous women. *Obstet Gynecol* 2012;119(6):1227-33.
- 424 3 Joy S, Istwan N, Rhea D, et al. The impact of maternal obesity on the incidence of  
425 adverse pregnancy outcomes in high-risk term pregnancies. *Am J Perinatology* 2009;26(5):345-  
426 9.
- 427 4 Thorsdottir I, Torfadottir JE, Birgisdottir BE, et al. Weight gain in women of normal  
428 weight before pregnancy: complications in pregnancy or delivery and birth outcome. *Obstet*  
429 *Gynecol* 2002;99(5 Pt 1):799-806.
- 430 5 Kristensen J, Vestergaard M, Wisborg K, et al. Pre-pregnancy weight and the risk of  
431 stillbirth and neonatal death. *BJOG* 2005;112(4):403-8.
- 432 6 Robinson SM, Crozier SR, Harvey NC, et al. Modifiable early-life risk factors for  
433 childhood adiposity and overweight: an analysis of their combined impact and potential for  
434 prevention. *Am J Clin Nutr* 2015;101(2):368-75.
- 435 7 Houghton LC, Ester WA, Lumey LH, et al. Maternal weight gain in excess of pregnancy  
436 guidelines is related to daughters being overweight 40 years later. *Am J Obstet Gynecol*  
437 2016;215(2):246.e1-.e8.
- 438 8 Hutcheon JA, Chapinal N, Bodnar LM, et al. The INTERGROWTH-21st gestational  
439 weight gain standard and interpregnancy weight increase: A population-based study of  
440 successive pregnancies. *Obesity (Silver Spring)* 2017;25(6):1122-7.
- 441 9 Gilmore LA, Klempel-Donchenko M, Redman LM. Pregnancy as a window to future  
442 health: Excessive gestational weight gain and obesity. *Seminars in Perinatology* 2015;39(4):296-  
443 303.
- 444 10 Leddy MA, Power ML, Schulkin J. The impact of maternal obesity on maternal and fetal  
445 health. *Rev Obstet Gynecol* 2008;1(4):170-8.
- 446 11 Melzer K, Schutz Y. Pre-pregnancy and pregnancy predictors of obesity. *Int J Obesity*  
447 2010;34 Suppl 2:S44-52.
- 448 12 Scott C, Andersen CT, Valdez N, et al. No global consensus: a cross-sectional survey of  
449 maternal weight policies. *BMC Pregnancy Childbirth* 2014;14:167.
- 450 13 Health Canada. Healthy Weight Gain During Pregnancy. Ottawa, Canada: Government  
451 of Canada; 2014.
- 452 14 Institute of Medicine. Weight Gain During Pregnancy: Reexamining the Guidelines.  
453 Rasmussen KM, Yaktine A, editors. Washington, DC: National Academies Press; 2009.
- 454 15 Institute of Medicine. Implementing Guidelines on Weight Gain and Pregnancy.  
455 Bethesda, MD: Institute of Medicine and National Research Council; 2013.
- 456 16 O'Connor DL, Blake J, Bell R, et al. Canadian Consensus on Female Nutrition:  
457 Adolescence, Reproduction, Menopause and Beyond. *JOGC* 2016;38(6):408-554.
- 458 17 Australian Government. Healthy Eating When You're Pregnant or Breastfeeding  
459 Canberra, Australia: National Health and Medical Research Council; 2015 [June 13, 2017].  
460 Available from: [https://www.eatforhealth.gov.au/eating-well/healthy-eating-throughout-all-  
461 life/healthy-eating-when-you%E2%80%99re-pregnant-or-breastfeeding](https://www.eatforhealth.gov.au/eating-well/healthy-eating-throughout-all-life/healthy-eating-when-you%E2%80%99re-pregnant-or-breastfeeding).
- 462 18 American College of Obstetricians and Gynecologists. Nutrition During Pregnancy 2015  
463 [June 13, 2017]. Available from: <http://www.acog.org/Patients/ACOG-Pregnancy-Book>.

- 1  
2  
3 464 19 Swedish National Food Agency. Food for you who are pregnant. Uppsala, Sweden:  
4 465 Swedish National Food Agency; 2015.
- 5 466 20 Lutsiv O, Bracken K, Pullenayegum E, et al. Little congruence between health care  
6 467 provider and patient perceptions of counselling on gestational weight gain. *J Obstet Gynaecol*  
7 468 *Can* 2012;34(6):518-24.
- 8 469 21 Ferrari RM, Siega-Riz AM, Evenson KR, et al. Provider advice about weight loss and  
9 470 physical activity in the postpartum period. *J Womens Health (Larchmt)* 2010;19(3):397-406.
- 10 471 22 Nikolopoulos H, Mayan M, MacIsaac J, et al. Women's perceptions of discussions about  
11 472 gestational weight gain with health care providers during pregnancy and postpartum: a  
12 473 qualitative study. *BMC Pregnancy Childbirth* 2017;17:97.
- 13 474 23 Chang T, Llanes M, Gold KJ, et al. Perspectives about and approaches to weight gain in  
14 475 pregnancy: a qualitative study of physicians and nurse midwives. *BMC Pregnancy Childbirth*  
15 476 2013;13:47-.
- 16 477 24 Duthie EA, Drew EM, Flynn KE. Patient-provider communication about gestational  
17 478 weight gain among nulliparous women: a qualitative study of the views of obstetricians and first-  
18 479 time pregnant women. *BMC Pregnancy Childbirth* 2013;13:231.
- 19 480 25 Herring SJ, Platek DN, Elliott P, et al. Addressing Obesity in Pregnancy: What Do  
20 481 Obstetric Providers Recommend? *Journal of Women's Health* 2010;19(1):65-70.
- 21 482 26 Stotland NE, Gilbert P, Bogetz A, et al. Preventing excessive weight gain in pregnancy:  
22 483 how do prenatal care providers approach counseling? *J Womens Health (Larchmt)*  
23 484 2010;19(4):807-14.
- 24 485 27 Chalmers B, Dzakpasu S, Heaman M, et al. The Canadian maternity experiences survey:  
25 486 an overview of findings. *J Obstet Gynaecol Can* 2008;30(3):217-28.
- 26 487 28 Ferraro ZM, Boehm KS, Gaudet LM, et al. Counseling about gestational weight gain and  
27 488 healthy lifestyle during pregnancy: Canadian maternity care providers' self-evaluation. *Int J*  
28 489 *Womens Health* 2013;5:629-36.
- 29 490 29 McDonald SD, Pullenayegum E, Bracken K, et al. Comparison of midwifery, family  
30 491 medicine, and obstetric patients' understanding of weight gain during pregnancy: a minority of  
31 492 women report correct counselling. *J Obstet Gynaecol Can* 2012;34(2):129-35.
- 32 493 30 Zhang W, Creswell J. The use of "mixing" procedure of mixed methods in health services  
33 494 research. *Medical Care* 2013;51(8):e51-7.
- 34 495 31 Creswell J, Klassen AC, Plano Clark V, et al. Best Practices for Mixed Methods Research  
35 496 in the Health Sciences. In: Office of Behavioral and Social Sciences Research, editor. Bethesda,  
36 497 MD: National Institutes of Health; 2011.
- 37 498 32 Harris PA, Taylor R, Thielke R, et al. Research electronic data capture (REDCap)--a  
38 499 metadata-driven methodology and workflow process for providing translational research  
39 500 informatics support. *J Biomed Inform* 2009;42(2):377-81.
- 40 501 33 Prenatal Nutrition Guidelines for Health Professionals - Gestational Weight Gain  
41 502 Recommendations. Health Canada. Ottawa: Health Canada; 2010.
- 42 503 34 Health Canada. Eating Well with Canada's Food Guide. In: Office of Nutrition Policy and  
43 504 Promotion, editor. Ottawa, ON Canada: Government of Canada; 2007.
- 44 505 35 Public Health Agency of Canada. Physical Activity and Pregnancy. Ottawa, ON, Canada:  
45 506 Public Health Agency of Canada; 2012.
- 46 507 36 Norman G. Likert scales, levels of measurement and the "laws" of statistics. *Adv Health*  
47 508 *Sci Educ Theory Pract* 2010;15(5):625-32.

- 1  
2  
3 509 37 Elo S, Kyngas H. The qualitative content analysis process. *J Adv Nursing*  
4 510 2008;62(1):107-15.  
5 511 38 Hsieh HF, Shannon SE. Three approaches to qualitative content analysis. *Qual Health*  
6 512 *Res* 2005;15(9):1277-88.  
7 513 39 Patton M. *Qualitative Research and Evaluation Methods*, 3rd Edition. Thousand Oaks,  
8 514 CA, USA: Sage; 2002.  
9 515 40 Morse JM, Barrett M, Mayan M, et al. Verification strategies for establishing reliability  
10 516 and validity in qualitative research. *Intl J Qualitative Methods* 2002;1(2):Article 2.  
11 517 41 Fetters MD, Curry LA, Creswell JW. Achieving integration in mixed methods designs-  
12 518 principles and practices. *Health Services Research* 2013;48(6 Pt 2):2134-56.  
13 519 42 Washington Cole KO, Gudzone KA, Bleich SN, et al. Influence of the 5A's Counseling  
14 520 Strategy on Weight Gain During Pregnancy: An Observational Study. *Journal of Women's*  
15 521 *Health* 2017.  
16 522 43 Peccei A, Blake-Lamb T, Rahilly D, et al. Intensive Prenatal Nutrition Counseling in a  
17 523 Community Health Setting: A Randomized Controlled Trial. *Obstet Gynecol* 2017;130(2):423-  
18 524 32.  
19 525 44 Mitchell LJ, Ball LE, Ross LJ, et al. Effectiveness of Dietetic Consultations in Primary  
20 526 Health Care: A Systematic Review of Randomized Controlled Trials. *Journal of the Academy of*  
21 527 *Nutrition and Dietetics* 2017.  
22 528 45 Heslehurst N, Newham J, Maniatopoulos G, et al. Implementation of pregnancy weight  
23 529 management and obesity guidelines: A meta-synthesis of healthcare professionals' barriers and  
24 530 facilitators using the Theoretical Domains Framework. *Pregnancy Hypertens* 2014;4(3):234-5.  
25 531 46 Magriples U, Boynton MH, Kershaw TS, et al. The impact of group prenatal care on  
26 532 pregnancy and postpartum weight trajectories. *Am J Obstet and Gynecol* 2015;213(5):688 e1-9.

533

534



1  
2  
3 535 **Authors' contributions**  
4

5 536 RCB and HN designed the study, and with MV and HPV developed the interview guide and  
6  
7  
8 537 survey questionnaire. JM and HN recruited interview participants and conducted the interviews.  
9  
10 538 JM recruited survey participants, conducted the qualitative and quantitative analyses and wrote  
11  
12 539 the first draft of the manuscript. HN and RCB contributed to the qualitative analysis and TB and  
13  
14 540 RCB contributed to quantitative analysis. VJ contributed to recruitment of interview  
15  
16  
17 541 participants. All authors made significant contributions to the critical review and revisions of the  
18  
19 542 manuscript. JM and RCB are the guarantors of the manuscript. All authors had full access to all  
20  
21 543 of the data (including statistical reports and tables) in the study and can take responsibility for the  
22  
23 544 integrity of the data and the accuracy of the data analysis. JM affirms that the manuscript is an  
24  
25 545 honest, accurate, and transparent account of the study being reported; that no important aspects  
26  
27 546 of the study have been omitted.  
28  
29  
30  
31

32  
33 547 **Acknowledgements**  
34

35 548 We would like to thank all of the participants in both components of the study for their time and  
36  
37 549 insight. We would also like to thank Melisa Spaling for her contribution to the analysis of the  
38  
39 550 qualitative data and Adam King for his help with recruiting participants to interview from British  
40  
41 551 Columbia.  
42  
43

44 552 **Conflict of interest**  
45

46  
47 553 All authors have completed the ICMJE uniform disclosure form at  
48  
49 554 [www.icmje.org/coi\\_disclosure.pdf](http://www.icmje.org/coi_disclosure.pdf) and declare: no support from any organisation for the  
50  
51 555 submitted work; no financial relationships with any organisations that might have an interest in  
52  
53 556 the submitted work in the previous three years; no other relationships or activities that could  
54  
55 557 appear to have influenced the submitted work.  
56  
57  
58  
59  
60

1  
2  
3 558  
4  
5  
6 559 **Funding:**  
7  
8 560 This study was funded by grants from Alberta Innovates – Health Solutions and the Danone  
9  
10 561 Institute of Canada. The funders had no involvement in the study design; in the collection,  
11  
12 562 analysis, and interpretation of data; in the writing of the report; nor the decision to submit the  
13  
14 563 article for publication.  
15  
16  
17 564  
18  
19  
20  
21  
22  
23  
24  
25  
26  
27  
28  
29  
30  
31  
32  
33  
34  
35  
36  
37  
38  
39  
40  
41  
42  
43  
44  
45  
46  
47  
48  
49  
50  
51  
52  
53  
54  
55  
56  
57  
58  
59  
60

565 Table 1. Characteristics of participating Canadian health care providers.

|                                                   | Survey Participants<br>N=508 |     | Interview Participants<br>N=23 |     |
|---------------------------------------------------|------------------------------|-----|--------------------------------|-----|
|                                                   | n                            | %   | n                              | %   |
| Health care provider discipline                   |                              |     |                                |     |
| General Practitioner                              | 159                          | 31% | 7                              | 30% |
| Obstetrician                                      | 139                          | 27% | 5                              | 22% |
| Midwife                                           | 97                           | 19% | 5                              | 22% |
| Registered Nurse - Primary Care                   | 75                           | 15% | 4                              | 17% |
| Nurse Practitioner                                | 38                           | 7%  | 2                              | 9%  |
| Province                                          |                              |     |                                |     |
| British Columbia                                  | 55                           | 11% | 9                              | 39% |
| Alberta                                           | 149                          | 30% | 14                             | 61% |
| Saskatchewan and Manitoba                         | 56                           | 11% |                                | N/A |
| Ontario                                           | 168                          | 33% |                                |     |
| Quebec                                            | 17                           | 3%  |                                |     |
| Maritimes*                                        | 47                           | 9%  |                                |     |
| Territories*                                      | 11                           | 2%  |                                |     |
| Location of practice                              |                              |     |                                |     |
| Urban                                             | 296                          | 58% |                                | N/C |
| Rural                                             | 125                          | 25% |                                |     |
| Urban and rural                                   | 86                           | 17% |                                |     |
| Proportion of all patients who are pregnant women |                              |     |                                |     |
| <10%                                              | 103                          | 20% |                                | N/C |
| 10-30%                                            | 94                           | 19% |                                |     |
| 30-60%                                            | 119                          | 23% |                                |     |
| 60-90%                                            | 46                           | 9%  |                                |     |
| >90%                                              | 146                          | 29% |                                |     |
| Stage of pregnancy at first visit                 |                              |     |                                |     |
| Before pregnancy                                  | 30                           | 6%  |                                | N/C |
| First trimester                                   | 328                          | 65% |                                |     |
| Second trimester                                  | 74                           | 15% |                                |     |
| Third trimester                                   | 34                           | 7%  |                                |     |
| Don't know/too variable to say                    | 41                           | 8%  |                                |     |

\*Maritimes=Newfoundland and Labrador, New Brunswick, Nova Scotia

\*Territories=Northwest Territories, Yukon Territory (no respondents from Nunavut)

N/A=Not applicable

N/C=Data not collected

566

567 Table 2. Survey responses regarding gestational weight gain counselling practices routinely  
 568 undertaken (with >90% of pregnant patients) by Canadian health care providers.

|                                                                                                                            | Health care provider discipline <sup>1</sup> |     |     |     |    |     |    |     |    |     | All |     |
|----------------------------------------------------------------------------------------------------------------------------|----------------------------------------------|-----|-----|-----|----|-----|----|-----|----|-----|-----|-----|
|                                                                                                                            | GP                                           |     | OB  |     | MW |     | NP |     | RN |     |     |     |
|                                                                                                                            | n                                            | %   | n   | %   | n  | %   | n  | %   | n  | %   | n   | %   |
| I provide women with a weight gain target based on their pre-pregnancy BMI                                                 |                                              |     |     |     |    |     |    |     |    |     |     |     |
|                                                                                                                            | 27                                           | 17% | 35  | 25% | 23 | 24% | 8  | 21% | 15 | 21% | 108 | 21% |
|                                                                                                                            | Missing                                      |     |     |     |    |     |    |     |    |     | 4   | 1%  |
| I discuss the recommended rate of weight gain based on their weight gain target                                            |                                              |     |     |     |    |     |    |     |    |     |     |     |
|                                                                                                                            | 22                                           | 14% | 19  | 14% | 15 | 16% | 11 | 29% | 15 | 21% | 82  | 16% |
|                                                                                                                            | Missing                                      |     |     |     |    |     |    |     |    |     | 6   | 1%  |
| I discuss the impact of inappropriate weight gain on the mother during pregnancy                                           |                                              |     |     |     |    |     |    |     |    |     |     |     |
|                                                                                                                            | 22                                           | 14% | 33  | 24% | 21 | 22% | 13 | 34% | 11 | 15% | 100 | 20% |
|                                                                                                                            | Missing                                      |     |     |     |    |     |    |     |    |     | 4   | 1%  |
| I discuss the impact of inappropriate weight gain on the baby                                                              |                                              |     |     |     |    |     |    |     |    |     |     |     |
|                                                                                                                            | 21                                           | 13% | 30  | 22% | 21 | 22% | 15 | 40% | 10 | 14% | 97  | 19% |
|                                                                                                                            | Missing                                      |     |     |     |    |     |    |     |    |     | 7   | 1%  |
| I weigh women at every visit                                                                                               |                                              |     |     |     |    |     |    |     |    |     |     |     |
|                                                                                                                            | 146                                          | 92% | 122 | 88% | 34 | 35% | 32 | 84% | 47 | 65% | 381 | 76% |
|                                                                                                                            | Missing                                      |     |     |     |    |     |    |     |    |     | 4   | 1%  |
| I relay weight gain information to women every time I weigh them                                                           |                                              |     |     |     |    |     |    |     |    |     |     |     |
|                                                                                                                            | 82                                           | 52% | 62  | 45% | 38 | 40% | 25 | 66% | 41 | 57% | 248 | 50% |
|                                                                                                                            | Missing                                      |     |     |     |    |     |    |     |    |     | 7   | 1%  |
| I discuss appropriate physical activity with pregnant women                                                                |                                              |     |     |     |    |     |    |     |    |     |     |     |
|                                                                                                                            | 75                                           | 48% | 53  | 38% | 61 | 64% | 20 | 53% | 22 | 31% | 231 | 46% |
|                                                                                                                            | Missing                                      |     |     |     |    |     |    |     |    |     | 7   | 1%  |
| I discuss appropriate extra food requirements with pregnant women                                                          |                                              |     |     |     |    |     |    |     |    |     |     |     |
|                                                                                                                            | 41                                           | 26% | 26  | 19% | 37 | 39% | 14 | 37% | 21 | 30% | 139 | 28% |
|                                                                                                                            | Missing                                      |     |     |     |    |     |    |     |    |     | 7   | 1%  |
| I can easily give examples of appropriate changes that women could make to meet extra food requirements                    |                                              |     |     |     |    |     |    |     |    |     |     |     |
|                                                                                                                            | 40                                           | 26% | 30  | 22% | 48 | 50% | 17 | 46% | 23 | 32% | 158 | 32% |
|                                                                                                                            | Missing                                      |     |     |     |    |     |    |     |    |     | 9   | 2%  |
| I discuss the importance of taking prenatal vitamins                                                                       |                                              |     |     |     |    |     |    |     |    |     |     |     |
|                                                                                                                            | 124                                          | 79% | 85  | 61% | 49 | 51% | 34 | 90% | 44 | 61% | 336 | 67% |
|                                                                                                                            | Missing                                      |     |     |     |    |     |    |     |    |     | 6   | 1%  |
| <sup>1</sup> GP=General Practitioner, OB=Obstetrician, MW=midwife, NP=Nurse Practitioner, RN=Primary Care Registered Nurse |                                              |     |     |     |    |     |    |     |    |     |     |     |

569

570

571 Table 3. Composite scores for gestational weight gain counselling practices and influences on  
 572 practices compared by health care provider discipline

|                                                                                           | Health care provider discipline <sup>1</sup> |                |                |                |                | All            | Sig.   | Post-hoc                         |
|-------------------------------------------------------------------------------------------|----------------------------------------------|----------------|----------------|----------------|----------------|----------------|--------|----------------------------------|
|                                                                                           | GP                                           | OB             | MW             | NP             | RN             |                |        |                                  |
| Providing weight gain advice and discussing the risks                                     | 2.95<br>(1.1)                                | 3.03<br>(1.2)  | 2.95<br>(1.2)  | 2.91<br>(1.5)  | 2.54<br>(1.3)  | 2.91<br>(1.2)  | 0.072  | N/A                              |
| Weighing women at every visit                                                             | 4.87<br>(0.54)                               | 4.75<br>(0.80) | 3.36<br>(1.56) | 4.61<br>(1.10) | 4.03<br>(1.55) | 4.41<br>(1.22) | <0.001 | MW < All**                       |
| Discussing physical activity and food requirements                                        | 3.65<br>(1.1)                                | 3.37<br>(1.1)  | 4.23<br>(0.8)  | 3.81<br>(1.1)  | 3.31<br>(1.4)  | 3.65<br>(1.1)  | <0.001 | MW > (GP, OB, RN)**              |
| General knowledge in GWG, physical activity, and nutrition                                | 3.50<br>(0.75)                               | 3.61<br>(0.75) | 3.77<br>(0.70) | 3.42<br>(0.80) | 3.36<br>(0.94) | 3.56<br>(0.78) | 0.017  | MW > RN*                         |
| Detailed knowledge of GWG, physical activity, and nutrition guidelines                    | 2.85<br>(0.98)                               | 2.96<br>(0.91) | 3.22<br>(0.88) | 2.85<br>(1.02) | 3.00<br>(1.01) | 2.97<br>(0.95) | 0.047  | MW > GP*                         |
| Priority level of discussing, assessing, and assisting women with appropriate weight gain | 4.09<br>(0.61)                               | 3.82<br>(0.82) | 3.59<br>(0.86) | 3.8<br>(0.87)  | 4.25<br>(0.65) | 3.89<br>(0.78) | <0.001 | MW < (GP, NP)**<br>OB- (GP, NP)* |

<sup>1</sup>GP=General Practitioner, OB=Obstetrician, MW=midwife, NP=Nurse Practitioner, RN=Primary Care Registered Nurse; \*Significant at 0.05; \*\*Significant at 0.01; Scale of 1=lowest to 5=highest score  
 Compared by one-way ANOVA

573 Table 4. Overarching categories and key concepts emerging from qualitative content analysis of  
 574 interviews with health care providers.

575

| Category                                | Concept                                                                             | Representative quote(s)                                                                                                                                                                                                                                                                                                                                                                                                                                                                                                                             |
|-----------------------------------------|-------------------------------------------------------------------------------------|-----------------------------------------------------------------------------------------------------------------------------------------------------------------------------------------------------------------------------------------------------------------------------------------------------------------------------------------------------------------------------------------------------------------------------------------------------------------------------------------------------------------------------------------------------|
| Practices                               | The first visit involves a large amount of information sharing                      | <p>“That’s the trouble with prenatal care. There’s so much information that women need, especially in the first trimester. Genetic screening, and lifestyle, and alcohol, and smoking, and family, and you know, on and on and on.”</p> <p>- General Practitioner</p>                                                                                                                                                                                                                                                                               |
|                                         | Weight is assessed routinely, but not discussed in detail unless there is a concern | <p>“Weight is something I would bring up with everyone at the first visit and only - well, I always check the weight every single other visit. But if there's no problem, I wouldn't bring it up. I might make a comment like, ‘Oh, your weight looks good.’”</p> <p>- General Practitioner</p>                                                                                                                                                                                                                                                     |
|                                         | Midwives have a different approach to gestational weight gain                       | <p>“We are aware of their weight gain. But more important to us than their weight gain is their nutrition and how they're feeling about it and, you know, providing encouragement, support and education so that they can be empowered to make healthy choices.”</p> <p>- Midwife</p> <p>"I feel like it’s really important to discuss healthy eating and exercise, but the actual focus on the weight gain and the number of pounds that a woman should gain, I don’t really feel that’s important at all, that piece of it.”</p> <p>- Midwife</p> |
| Individual level influences on practice | Priority level                                                                      | <p>“But certainly there are definitely times where I feel constricted by time. I think nutrition and exercise is a huge priority, so that's just my personal opinion. I think that I wouldn't - I don't know, I would make the time.”</p> <p>- Midwife</p>                                                                                                                                                                                                                                                                                          |
|                                         | Sensitivity of the discussion                                                       | <p>“Any discussion around weight can be a very charged issue and, depending on the woman and her BMI, and her history, she may have had a history of an eating disorder or whatever. You don’t always know what issues she’s had in the past and they can be very significant, so there could be a lot of anxiety on the patient’s side around weight gain and so that will always cover a conversation, especially if you don’t know her very well.”</p> <p>- General Practitioner</p>                                                             |
|                                         | General knowledge of gestational weight gain, nutrition, and                        | <p>“I do find that nutrition is not covered at all in my medical school and through residency. I don’t remember any teaching sessions at all on weight gain in pregnancy, obesity in pregnancy or that. We have one teaching session</p>                                                                                                                                                                                                                                                                                                            |

1  
2  
3  
4  
5  
6  
7  
8  
9  
10  
11  
12  
13  
14  
15  
16  
17  
18  
19  
20  
21  
22  
23  
24  
25  
26  
27  
28  
29  
30  
31  
32  
33  
34  
35  
36  
37  
38  
39  
40  
41  
42  
43  
44  
45  
46  
47  
48  
49  
50  
51  
52  
53  
54  
55  
56  
57  
58  
59  
60

physical activity

every two years for an hour on it.”

- Obstetrician

Detailed knowledge  
of practice  
guidelines

“I have to know so many rules about all sorts of things. I always kind of go by, you know, 5, 10, 15. So those three numbers I remember, 5, 10, 15. If you're overweight, if your BMI is higher than, you know, 26 or 27, or higher than 28 or so, I would say, 5 kilos. If your weight is pretty well normal I'd say 10 kilos. And if your weight is under I'd say 15 kilos.”

- General Practitioner

Time and  
compensation

“And that's a different model for us because we're not billing per fee code. So when I see a woman, I can talk to her or counsel her or do anything in that visit, it doesn't – so, it's different than the physicians, I guess, because they're constrained by billing for what they're talking to the people about.”

- Midwife

System  
level  
influences  
on  
practice

“I guess the biggest structural problem is the short prenatal visit and the amount of information that has to be gathered and disseminated in that visit, which is typically anything from ten to 15 minutes long.”

- General Practitioner

Access to allied  
health services

“So I find the most successful story of patients achieving their [weight] goals and continuing postpartum, were women who I initially brought up the topic [with], referred to our dietitian and psychologist and they [women] continued to follow up with me and with them. So they had that longer term follow-up and this goal setting and checking in with someone.”

- Obstetrician

576

577 Table 5. Predictors of Canadian health care providers providing advice to pregnant women  
 578 about gestational weight gain and discussing risks of inappropriate weight gain during a prenatal  
 579 visit.

| Variable                                                                                  | Model <sup>1</sup> |                 |          |
|-------------------------------------------------------------------------------------------|--------------------|-----------------|----------|
|                                                                                           | Unstd $\beta$      | S.E. of $\beta$ | Std Beta |
| (Constant)                                                                                | -1.14**            | 0.38            |          |
| General practitioner ( <i>reference</i> )                                                 |                    |                 |          |
| Obstetrician                                                                              | 0.242              | 0.145           | 0.093    |
| Midwife                                                                                   | -0.076             | 0.199           | -0.026   |
| Primary care RN                                                                           | -0.029             | 0.177           | -0.008   |
| Nurse Practitioner                                                                        | -0.057             | 0.206           | -0.012   |
| Detailed knowledge of GWG, physical activity, and nutrition guidelines                    | 0.26**             | 0.069           | 0.202    |
| General knowledge in GWG, physical activity, and nutrition                                | 0.098              | 0.081           | 0.065    |
| Priority level of discussing, assessing, and assisting women with appropriate weight gain | 0.71**             | 0.071           | 0.459    |
| Role (I am the most appropriate provider to discuss gestational weight gain)              | 0.172              | 0.133           | 0.056    |
|                                                                                           | R <sup>2</sup>     | 0.392           |          |

\*p<0.05 \*\*p<0.01

<sup>1</sup>Model is adjusted for: urban/rural location, Proportion of all patients who are pregnant, and trimester of pregnancy at first visit.

Unstd=Unstandardized, S.E.=Standard Error, Std=Standardized

580

581



582 Table 6. Predictors of Canadian health care providers discussing physical activity and food  
 583 requirements with women as part of a prenatal visit.

| Variable                                                                                  | Model <sup>1</sup> |                 |          |
|-------------------------------------------------------------------------------------------|--------------------|-----------------|----------|
|                                                                                           | Unstd $\beta$      | S.E. of $\beta$ | Std Beta |
| (Constant)                                                                                | 0.688              | 0.345           |          |
| General practitioner ( <i>reference</i> )                                                 |                    |                 |          |
| Obstetrician                                                                              | 0.022              | 0.13            | 0.009    |
| Midwife                                                                                   | 0.518**            | 0.179           | 0.192    |
| Primary care RN                                                                           | 0                  | 0.160           | 0        |
| Nurse Practitioner                                                                        | 0.342              | 0.189           | 0.077    |
| Detailed knowledge of GWG, physical activity, and nutrition guidelines                    | 0.277**            | 0.063           | 0.229    |
| General knowledge in GWG, physical activity, and nutrition                                | 0.311**            | 0.073           | 0.22     |
| Priority level of discussing, assessing, and assisting women with appropriate weight gain | 0.341**            | 0.064           | 0.236    |
| Role (I am the most appropriate provider to discuss gestational weight gain)              | 0.18               | 0.12            | 0.063    |
|                                                                                           | R <sup>2</sup>     | 0.434           |          |

\*p<0.05 \*\*p<0.01

<sup>1</sup>Model is adjusted for: urban/rural location, proportion of all patients who are pregnant, and trimester of pregnancy at first visit

Unstd=Unstandardized, S.E.=Standard Error, Std=Standardized

584

# Healthy Pregnancy Weight Gain Research Study

1  
2  
3  
4  
5  
6  
7  
8  
9  
10  
11  
12  
13  
14  
15  
16  
17  
18  
19  
20  
21  
22  
23  
24  
25  
26  
27  
28  
29  
30  
31  
32  
33  
34  
35  
36  
37  
38  
39  
40  
41  
42  
43  
44  
45  
46  
47  
48  
49  
50  
51  
52  
53  
54  
55  
56  
57  
58  
59  
60

For peer review only

1 Do you see pregnant women in your practice?  Yes  
2  No  
3  
4 In which Canadian province or territory do you work?  British Columbia  
5  Alberta  
6  Saskatchewan  
7  Manitoba  
8  Ontario  
9  Quebec  
10  Newfoundland and Labrador  
11  New Brunswick  
12  Prince Edward Island  
13  Nova Scotia  
14  Yukon  
15  Northwest Territories  
16  Nunavut  
17 What best describes the location of your practice?  Urban  
18  Rural  
19  Urban and rural  
20  
21 In what type of practice setting do you work?  Solo  
22 (Please select all that apply)  Group  
23  Interdisciplinary  
24  Academic  
25  
26 What is your occupational specialty?  General Practitioner/Family Physician  
27  Obstetrician/Gynecologist  
28  Physician - other  
29  Registered Midwife  
30  Nurse Practitioner  
31  Registered Nurse  
32  Prenatal Educator  
33  Registered Dietitian  
34  Other  
35  
36 My primary practice is:  Public/community health  
37  Primary care  
38  Acute care  
39  Other  
40  
41 Please specify:  Registered Nurse  
42  Perinatal support worker  
43  Other  
44  
45 Please specify: \_\_\_\_\_  
46  
47  
48  
49  
50  
51  
52  
53  
54  
55  
56  
57  
58  
59  
60

1 What are some common reasons for pregnant women to be referred to you? (Check all that apply)

- 2
- 3  General healthy eating
- 4  High pre-pregnancy BMI
- 5  Low pre-pregnancy BMI
- 6  Excessive weight gain
- 7  Inadequate weight gain
- 8  Multiple food restrictions, e.g. vegetarian, food allergies, etc.
- 9  Nausea/vomiting
- 10  Twin/multiple pregnancy
- 11  Adolescent pregnancy
- 12  Concurrent medical condition, e.g. diabetes in pregnancy
- 13  All pregnant women in my health care setting are referred to me
- 14  I see pregnant women in a group setting
- 15  Other (Please specify)
- 16
- 17
- 18
- 19
- 20
- 21
- 22
- 23
- 24
- 25
- 26
- 27
- 28
- 29
- 30
- 31
- 32
- 33
- 34
- 35
- 36
- 37
- 38
- 39
- 40
- 41
- 42
- 43
- 44
- 45
- 46
- 47
- 48
- 49
- 50
- 51
- 52
- 53
- 54
- 55
- 56
- 57
- 58
- 59
- 60

For peer review only

1  
2  
3  
4  
5  
6  
7  
8  
9  
10  
11  
12  
13  
14  
15  
16  
17  
18  
19  
20  
21  
22  
23  
24  
25  
26  
27  
28  
29  
30  
31  
32  
33  
34  
35  
36  
37  
38  
39  
40  
41  
42  
43  
44  
45  
46  
47  
48  
49  
50  
51  
52  
53  
54  
55  
56  
57  
58  
59  
60

Of all the patient/clients you see in your practice, what proportion are pregnant women?

- < 10%
- 10-30%
- 30-60%
- 60-90%
- >90%

At what stage during pregnancy do you typically see women for the first time?

- Before they become pregnant, i.e. planning to become pregnant
- First trimester
- Second trimester
- Third trimester
- Don't know/too variable to say

For peer review only

1  
2 **Given all of the issues of concern during a typical prenatal visit, how often do women ask you**  
3 **about:**

|                                                                     | Almost never(< 10%)   | Rarely(10-30%)        | Sometimes(30-60%)     | Often(60-90%)         | Almost always(>90%)   |
|---------------------------------------------------------------------|-----------------------|-----------------------|-----------------------|-----------------------|-----------------------|
| 4<br>5<br>6<br>7<br>8 How much weight to gain during pregnancy      | <input type="radio"/> |
| 9<br>10<br>11 Healthy eating during pregnancy                       | <input type="radio"/> |
| 12<br>13 How much they should be eating during pregnancy            | <input type="radio"/> |
| 14<br>15 Where to find resources about healthy eating for pregnancy | <input type="radio"/> |

16  
17  
18  
19  
20  
21  
22  
23  
24  
25  
26  
27  
28  
29  
30  
31  
32  
33  
34  
35  
36  
37  
38  
39  
40  
41  
42  
43  
44  
45  
46  
47  
48  
49  
50  
51  
52  
53  
54  
55  
56  
57  
58  
59  
60

For peer review only

**With what percentage of pregnant women do you undertake the following activities?**

|                                                                                                         | < 10%                 | 10-30%                | 30-60%                | 60-90%                | >90%                  |
|---------------------------------------------------------------------------------------------------------|-----------------------|-----------------------|-----------------------|-----------------------|-----------------------|
| I provide pregnant women with a weight gain target based on their pre-pregnancy BMI                     | <input type="radio"/> |
| I discuss the recommended rate of weight gain (kg/wk) based on their weight gain target                 | <input type="radio"/> |
| I discuss the impact that inappropriate weight gain can have on the mother during pregnancy             | <input type="radio"/> |
| I discuss the impact that inappropriate weight gain can have on the baby                                | <input type="radio"/> |
| I weigh women at every visit                                                                            | <input type="radio"/> |
| I relay weight gain information to women every time I weigh them                                        | <input type="radio"/> |
| I discuss appropriate physical activity with pregnant women                                             | <input type="radio"/> |
| I discuss appropriate extra food requirements with pregnant women                                       | <input type="radio"/> |
| I can easily give examples of appropriate changes that women could make to meet extra food requirements | <input type="radio"/> |
| I discuss the importance of taking prenatal vitamins                                                    | <input type="radio"/> |

1  
2  
3  
4  
5  
6  
7  
8  
9  
10  
11  
12  
13  
14  
15  
16  
17  
18  
19  
20  
21  
22  
23  
24  
25  
26  
27  
28  
29  
30  
31  
32  
33  
34  
35  
36  
37  
38  
39  
40  
41  
42  
43  
44  
45  
46  
47  
48  
49  
50  
51  
52  
53  
54  
55  
56  
57  
58  
59  
60

**I am confident that I could accurately summarize at least 80% of the content of each of the following guidelines to my colleagues within the next week:**

|                                                                                                                                                            | Strongly disagree     | Disagree              | Neither disagree nor agree | Agree                 | Strongly agree        |
|------------------------------------------------------------------------------------------------------------------------------------------------------------|-----------------------|-----------------------|----------------------------|-----------------------|-----------------------|
| Health Canada 2010 guidelines for pregnancy weight gain                                                                                                    | <input type="radio"/> | <input type="radio"/> | <input type="radio"/>      | <input type="radio"/> | <input type="radio"/> |
| Joint Society of Obstetricians and Gynecologists of Canada (SOGC) and Canadian Society for Exercise Physiology (CSEP) guidelines for exercise in pregnancy | <input type="radio"/> | <input type="radio"/> | <input type="radio"/>      | <input type="radio"/> | <input type="radio"/> |
| Physical Activity Readiness Medical Examination (PARMed-X) for Pregnancy                                                                                   | <input type="radio"/> | <input type="radio"/> | <input type="radio"/>      | <input type="radio"/> | <input type="radio"/> |
| Health Canada's Prenatal Nutrition Guidelines for Health Professionals                                                                                     | <input type="radio"/> | <input type="radio"/> | <input type="radio"/>      | <input type="radio"/> | <input type="radio"/> |

For peer review only



1 **Given all of the issues of concern during a typical prenatal visit, I consider...**

|                                                                                                                                                                                        | Strongly disagree     | Disagree              | Neither disagree nor agree | Agree                 | Strongly agree        |
|----------------------------------------------------------------------------------------------------------------------------------------------------------------------------------------|-----------------------|-----------------------|----------------------------|-----------------------|-----------------------|
| 7 Discussing appropriate gestational weight gain with women a high priority                                                                                                            | <input type="radio"/> | <input type="radio"/> | <input type="radio"/>      | <input type="radio"/> | <input type="radio"/> |
| 11 Assessing gestational weight gain a high priority                                                                                                                                   | <input type="radio"/> | <input type="radio"/> | <input type="radio"/>      | <input type="radio"/> | <input type="radio"/> |
| 14 Assisting women with appropriate gestational weight gain (e.g. addressing barriers and facilitators; providing resources; referrals to appropriate providers; etc.) a high priority | <input type="radio"/> | <input type="radio"/> | <input type="radio"/>      | <input type="radio"/> | <input type="radio"/> |

22 Is there anything that could increase the level of priority you place on discussing, assessing, or assisting gestational weight gain with pregnant women?

29 Are there any changes you would suggest to increase the likelihood of discussing, assessing or assisting women with gestational weight gain? (Please select all that apply)

- Including "gestational weight gain" on the prenatal form
- Including "calculate cumulative gestational weight gain" on the antenatal record
- Increase your knowledge of consequences of inappropriate gestational weight gain
- Having resources that will prompt/remind me to discuss, assess or assist women
- Change in fee schedule
- Other

39 Please specify:

40 \_\_\_\_\_

43 Is the fee schedule appropriate for the workload in prenatal visits?

- Yes
- No
- Not applicable

46 Please explain:

47 \_\_\_\_\_

1  
2 **In your practice setting, who do you think is the most suitable person to discuss, assess,**  
3 **assist, and follow-up with gestational weight gain with women?**  
4

|    | Discuss                  | Assess                   | Assist                   | Follow-up                |
|----|--------------------------|--------------------------|--------------------------|--------------------------|
| 5  |                          |                          |                          |                          |
| 6  |                          |                          |                          |                          |
| 7  | <input type="checkbox"/> | <input type="checkbox"/> | <input type="checkbox"/> | <input type="checkbox"/> |
| 8  |                          |                          |                          |                          |
| 9  | <input type="checkbox"/> | <input type="checkbox"/> | <input type="checkbox"/> | <input type="checkbox"/> |
| 10 |                          |                          |                          |                          |
| 11 | <input type="checkbox"/> | <input type="checkbox"/> | <input type="checkbox"/> | <input type="checkbox"/> |
| 12 |                          |                          |                          |                          |
| 13 | <input type="checkbox"/> | <input type="checkbox"/> | <input type="checkbox"/> | <input type="checkbox"/> |
| 14 |                          |                          |                          |                          |
| 15 | <input type="checkbox"/> | <input type="checkbox"/> | <input type="checkbox"/> | <input type="checkbox"/> |
| 16 |                          |                          |                          |                          |
| 17 | <input type="checkbox"/> | <input type="checkbox"/> | <input type="checkbox"/> | <input type="checkbox"/> |
| 18 |                          |                          |                          |                          |
| 19 | <input type="checkbox"/> | <input type="checkbox"/> | <input type="checkbox"/> | <input type="checkbox"/> |
| 20 |                          |                          |                          |                          |
| 21 | <input type="checkbox"/> | <input type="checkbox"/> | <input type="checkbox"/> | <input type="checkbox"/> |
| 22 |                          |                          |                          |                          |

23  
24 Please specify provider: \_\_\_\_\_  
25  
26  
27  
28  
29  
30  
31  
32  
33  
34  
35  
36  
37  
38  
39  
40  
41  
42  
43  
44  
45  
46  
47  
48  
49  
50  
51  
52  
53  
54  
55  
56  
57  
58  
59  
60

**To what extent do you agree or disagree with the following statements? I have appropriate...**

|                                                                                                                            | Strongly disagree     | Disagree              | Neither disagree nor agree | Agree                 | Strongly agree        |
|----------------------------------------------------------------------------------------------------------------------------|-----------------------|-----------------------|----------------------------|-----------------------|-----------------------|
| Knowledge to recommend guideline concordant pregnancy weight gain                                                          | <input type="radio"/> | <input type="radio"/> | <input type="radio"/>      | <input type="radio"/> | <input type="radio"/> |
| Information resources to support recommending guideline concordant pregnancy weight gain                                   | <input type="radio"/> | <input type="radio"/> | <input type="radio"/>      | <input type="radio"/> | <input type="radio"/> |
| Knowledge to recommend guideline concordant physical activity                                                              | <input type="radio"/> | <input type="radio"/> | <input type="radio"/>      | <input type="radio"/> | <input type="radio"/> |
| Information resources to support recommending guideline concordant physical activity                                       | <input type="radio"/> | <input type="radio"/> | <input type="radio"/>      | <input type="radio"/> | <input type="radio"/> |
| Knowledge to recommend guideline concordant healthy eating during pregnancy                                                | <input type="radio"/> | <input type="radio"/> | <input type="radio"/>      | <input type="radio"/> | <input type="radio"/> |
| Information resources to support recommending guideline concordant healthy eating during pregnancy                         | <input type="radio"/> | <input type="radio"/> | <input type="radio"/>      | <input type="radio"/> | <input type="radio"/> |
| Programs for referral to promote healthy nutrition during pregnancy (e.g. dietitian, prenatal nutrition education classes) | <input type="radio"/> | <input type="radio"/> | <input type="radio"/>      | <input type="radio"/> | <input type="radio"/> |

# BMJ Open

## Health care provider's gestational weight gain counselling practices and the influence of knowledge and attitudes: A cross-sectional mixed methods study

|                                 |                                                                                                                                                                                                                                                                                                                                                                                                                                                                                                                                                                                                                    |
|---------------------------------|--------------------------------------------------------------------------------------------------------------------------------------------------------------------------------------------------------------------------------------------------------------------------------------------------------------------------------------------------------------------------------------------------------------------------------------------------------------------------------------------------------------------------------------------------------------------------------------------------------------------|
| Journal:                        | <i>BMJ Open</i>                                                                                                                                                                                                                                                                                                                                                                                                                                                                                                                                                                                                    |
| Manuscript ID                   | bmjopen-2017-018527.R2                                                                                                                                                                                                                                                                                                                                                                                                                                                                                                                                                                                             |
| Article Type:                   | Research                                                                                                                                                                                                                                                                                                                                                                                                                                                                                                                                                                                                           |
| Date Submitted by the Author:   | 04-Oct-2017                                                                                                                                                                                                                                                                                                                                                                                                                                                                                                                                                                                                        |
| Complete List of Authors:       | Morris, Jillian; University of Alberta, Agricultural, Food and Nutritional Science<br>Nikolopoulos, Hara; University of Alberta, Agricultural, Food and Nutritional Science<br>Berry, Tanya; University of Alberta, Faculty of Physical Education and Recreation<br>Jain, Venu; University of Alberta, Department of Obstetrics & Gynecology<br>Vallis, Michael; Dalhousie University, Behaviour Change Institute, Dept of Family Medicine<br>Piccinini-Vallis, Helena; Dalhousie University, Family Medicine<br>Bell, R; University of Alberta, Agricultural, Food and Nutritional Science; University of Alberta |
| <b>Primary Subject Heading</b>: | Obstetrics and gynaecology                                                                                                                                                                                                                                                                                                                                                                                                                                                                                                                                                                                         |
| Secondary Subject Heading:      | General practice / Family practice                                                                                                                                                                                                                                                                                                                                                                                                                                                                                                                                                                                 |
| Keywords:                       | Counselling, Gestational Weight Gain, Health Care Providers, Pregnancy                                                                                                                                                                                                                                                                                                                                                                                                                                                                                                                                             |
|                                 |                                                                                                                                                                                                                                                                                                                                                                                                                                                                                                                                                                                                                    |

SCHOLARONE™  
Manuscripts

1  
2  
3 **1 Health care provider's gestational weight gain counselling practices and the influence of**  
4 **knowledge and attitudes: A cross-sectional mixed methods study**  
5  
6  
7  
8

9 4 Jill Morris<sup>1</sup>

10 5 Hara Nikolopoulos<sup>1</sup>

11 6 Tanya Berry<sup>2</sup>

12 7 Venu Jain<sup>3</sup>

13 8 Michael Vallis<sup>4</sup>

14 9 Helena Piccinini-Vallis<sup>5</sup>

15 10 Rhonda C Bell<sup>1</sup>

16 11 and the ENRICH team  
17  
18  
19  
20  
21  
22  
23  
24

25 13 1. Department of Agricultural, Food and Nutritional Science, University of Alberta,  
26 14 Edmonton, Alberta, Canada, T6G 2E1

27 15 2. Faculty of Physical Education and Recreation, University of Alberta, 1-153 University  
28 16 Hall, Edmonton, Alberta, Canada, T6G 2J9

29 17 3. Department of Obstetrics & Gynecology, University of Alberta, 5S131 LHH, 10240  
30 18 Kingsway Ave., Edmonton, Alberta, Canada, T5H 3V9

31 19 4. Behaviour Change Institute, Dept of Family Medicine, Dalhousie University, Halifax,  
32 20 NS, Canada B3L 2C2

33 21 5. Department of Family Medicine, Dalhousie University, 5900 Veteran's Memorial Lane,  
34 22 Halifax, NS, Canada, B3H 2E2  
35  
36  
37  
38

39 24 **Correspondence to:** Dr. Rhonda C Bell, 4-126 Li Ka Shing Centre for Health Innovation,  
40 25 University of Alberta, Edmonton, Alberta, Canada, T6G 2E1, [rhonda.bell@ualberta.ca](mailto:rhonda.bell@ualberta.ca),  
41 26 Telephone: 780-492-7742  
42

43 27 **Word count**

44 28 Manuscript: 3866  
45  
46  
47  
48  
49  
50  
51  
52  
53  
54  
55  
56  
57  
58  
59  
60

1  
2  
3 30 **Keywords:** Counselling, gestational weight gain, health care providers, pregnancy  
4  
5

6 31 **Abstract**  
7  
8

9 32 **Objective:** To understand current gestational weight gain (GWG) counselling practices of health  
10  
11 33 care providers, and the relationships between practices, knowledge and attitudes.  
12

13 34 **Design:** Concurrent mixed methods with data integration: cross-sectional survey and semi-  
14  
15 35 structured interviews.  
16  
17

18 36 **Participants:** Prenatal health care providers in Canada: general practitioners, obstetricians,  
19  
20 37 midwives, nurse practitioners, and registered nurses in primary care settings.  
21  
22

23 38 **Results:** Typically, GWG information was provided early in pregnancy, but not discussed again  
24  
25 39 unless there was a concern. Few routinely provided women with individualized GWG advice  
26  
27 40 (21%), rate of GWG (16%), or discussed the risks of inappropriate GWG to mother and baby  
28  
29 41 (20% and 19%). More routinely discussed physical activity (46%) and food requirements (28%);  
30  
31 42 midwives did these two activities more frequently than all other disciplines ( $p<0.001$ ).  
32  
33

34 43 Midwives interviewed noted a focus on overall wellness instead of weight, and had longer  
35  
36 44 appointment times which allowed them to provide more in-depth counselling. Regression results  
37  
38 45 identified that the higher priority level that health care providers place on GWG, the more likely  
39  
40 46 they were to report providing GWG advice and discussing risks of GWG outside  
41  
42 47 recommendations ( $\beta=0.71$ ,  $p<0.001$ ) and discussing physical activity and food requirements  
43  
44 48 ( $\beta=0.341$ ,  $p<0.001$ ). Interview data linked the priority level of GWG to length of appointments,  
45  
46 49 financial compensation methods for health care providers, and the midwifery versus medical  
47  
48 50 model of care.  
49  
50  
51  
52  
53  
54  
55  
56  
57  
58  
59  
60

1  
2  
3 51 **Conclusions:** Interventions for health care providers to enhance GWG counselling practices  
4  
5  
6 52 should consider the range of factors that influence the priority level health care providers place  
7  
8 53 on GWG counselling.  
9

10 54

11  
12  
13 55 **Strengths and Limitations Of This Study: (max 5 bullet points)**

- 14  
15 56
- 16 • This is a large and in-depth examination and comparison of health care providers'  
17 practices related to monitoring and discussing GWG with pregnant women,  
18
  - 19 58 • This study is enhanced by the use of mixed methods. Mixed methods research is well  
20 suited for health services, which are complex and influenced by multiple factors.  
21  
22 59
  - 23 • The findings from this study may have a wide applicability, as the topics covered in this  
24 survey are considered routine and are undertaken as part of standard prenatal care in most  
25 developed countries.  
26  
27 61
  - 28 • It was not possible to calculate a true response rate for the survey since the survey was  
29 distributed using email lists and social media through professional associations and  
30 networks although these methods allowed for wider reach and more responses.  
31  
32 62
  - 33 • Those who responded may be more likely to engage in activities related to GWG  
34 counselling which could lead to inflation of the reported frequency of specific GWG  
35 counselling practices.. Nevertheless, the rates of some counselling practices reported in  
36 this study are quite low.  
37  
38 69

39 70

40 71

41

42

43

44

45

46

## 72 **Introduction**

73 Supporting all women to achieve healthy gestational weight gain (GWG) is of clinical  
74 importance because GWG lower or higher than recommended is linked to a range of poor  
75 maternal, fetal, and childhood outcomes. [1] For mothers, excess GWG increases the risk of  
76 gestational diabetes mellitus and hypertensive disorders in pregnancy, and this is of special  
77 concern if excessive GWG occurs early in pregnancy. [2-4] Excess GWG also poses risks at  
78 delivery for the mother including increased likelihood of needing an instrumental delivery or a  
79 Caesarean section, and surgical morbidity and mortality. [1, 3] Further, these factors result in an  
80 increased risk for the fetus and neonate including the adverse consequences of macrosomia and  
81 shoulder dystocia, need for intensive care unit admission, and the risk of perinatal death. [1, 3]  
82 [5] In the long term, the child is at risk of an altered growth trajectory that may lead to obesity.  
83 [6, 7] Excess GWG also increases the risk of postpartum weight retention, which may leave a  
84 woman at an increased Body Mass Index (BMI) to begin her next pregnancy. [1] [8] The cycle of  
85 excess GWG followed by postpartum weight retention and increasing maternal BMI can lead to  
86 increased risk in each subsequent pregnancy.[9] These risks act synergistically resulting in a  
87 higher risk of metabolic and cardiovascular disease in later life for the mother as well as the  
88 child.[10] Thus, excess GWG has short term, long term and intergenerational effects. [11]

89 To mitigate the risks of inappropriate GWG, many countries, including Canada, have released  
90 GWG guidelines. [12] [13] Many of these are based on the Institute of Medicine (USA)  
91 guidelines for GWG in pregnancy, which outline a range of total GWG over the course of  
92 pregnancy that is associated with optimal health outcomes for mother and child. [14] In order for  
93 these guidelines to be of benefit to pregnant women, the Institute of Medicine recommends that  
94 health care providers advise women on the recommended range of GWG based on pre-



1  
2  
3 95 pregnancy BMI, and that they track and discuss weight progress over the course of pregnancy, as  
4  
5 96 well as offering tailored counselling on dietary intake and physical activity. [15] Many countries  
6  
7  
8 97 provide guidance to health care providers in the form of evidence-based guidelines in order to  
9  
10 98 support them in providing physical activity and nutrition counselling to pregnant women. [16]  
11  
12  
13 99 [17-19]

14  
15  
16 100 There is growing evidence to suggest that the quality of GWG counselling interactions needs  
17  
18 101 improvement, as women and health care providers report conflicting views of these interactions.  
19  
20 102 [20] Many women report that their health care provider did not provide recommendations for  
21  
22  
23 103 GWG during their prenatal care, nor provide counselling about nutrition and physical activity  
24  
25 104 behaviours during pregnancy [21, 22] Health care providers have reported taking a reactive  
26  
27  
28 105 approach, initiating a discussion about weight in pregnancy only after weight exceeds the  
29  
30 106 recommendations. [23, 24] Health care providers may lack knowledge or skills to undertake this  
31  
32  
33 107 type of counselling[25] [26], or consider GWG to be a low priority in the context of a typical  
34  
35 108 prenatal visit.[23]

36  
37 109  
38  
39  
40 110 Women may see a variety of health care provider disciplines for prenatal care including general  
41  
42 111 practitioners, obstetricians, midwives, nurse practitioners, and registered nurses. [27] There is  
43  
44 112 some evidence to suggest that the approach to GWG counselling may vary by health care  
45  
46  
47 113 provider discipline [28, 29]; however, this area has not been fully explored. In order to better  
48  
49 114 support health care providers to have positive GWG counselling interactions with women, there  
50  
51 115 needs to be a detailed understanding of current practices, and what is influencing these practices.  
52  
53  
54 116 This information can be used to develop interventions to promote appropriate GWG in routine  
55  
56 117 prenatal care. As such, the objectives of this study were to characterize and compare the GWG  
57  
58  
59  
60

1  
2  
3 118 counselling practices of health care providers who provide prenatal care; and to examine  
4  
5  
6 119 potential influences on advice and counselling practices.  
7

8 120

9  
10  
11 121 **Methods**

12  
13 122 Study design

14  
15  
16 123 This study was conducted using a concurrent mixed methods design, consisting of an online  
17  
18 124 survey and semi-structured qualitative interviews. Qualitative and quantitative data were  
19  
20  
21 125 collected in tandem, analyzed separately, and integrated.[30] Mixed methods research is well  
22  
23 126 suited for research questions that call for real-life contextual understandings and multi-level  
24  
25 127 influences, and lends itself well to the development of complex interventions. [31]  
26  
27

28 128

29  
30 129 Ethics approval for this study was obtained from the Health Research Ethics Board at the  
31  
32 130 University of Alberta (Study Identification Pro00045899). All participants provided informed  
33  
34  
35 131 consent to participate in this study.  
36

37 132

38  
39 133 Quantitative methods

40  
41 134 *Survey development*

42  
43  
44 135 A survey questionnaire was developed, pilot-tested, and assessed for content validity by a team  
45  
46 136 of researchers with expertise in the areas of obstetrics, nutrition, exercise physiology, health  
47  
48  
49 137 promotion, and health psychology (Supplementary file).  
50

51 138 *Recruitment and data collection*

52  
53  
54 139 Health care providers including general practitioners, obstetricians, midwives, nurse  
55  
56 140 practitioners, and registered nurses in primary care settings from across Canada were recruited  
57  
58  
59  
60

1  
2  
3 141 through professional associations and networks who agreed to distribute survey information to  
4  
5 142 their members. All health care providers who provided prenatal care were eligible to participate.  
6  
7  
8 143 The survey was available from December 2014 to May 2015 on Research Electronic Data  
9  
10 144 Capture (REDCap) software hosted at the University of Alberta.[32]  
11

### 12 145 *Outcomes*

13  
14  
15 146 Survey participants provided information about their professional characteristics, and were asked  
16  
17 147 to respond to questions regarding their practices, knowledge, and attitudes related to GWG,  
18  
19  
20 148 nutrition and physical activity. Specifically, participants were asked about the proportion of their  
21  
22 149 pregnant patients with whom they undertook selected GWG counselling practices as outlined in  
23  
24 150 the Institute of Medicine recommendations[15], using a scale from 1 (<10% of pregnant patients)  
25  
26 151 to 5 (>90% of pregnant patients). Respondents were also asked for their self-assessment of their  
27  
28 152 general knowledge to support GWG counselling, their detailed knowledge of the content of  
29  
30 153 practice guidelines related to GWG (specifically the IOM/Health Canada GWG guidelines[33],  
31  
32 154 and Health Canada's nutrition guidelines[34] and physical activity guidelines[35]), and the  
33  
34 155 priority level they placed on discussing, assessing, and assisting women with GWG (e.g., *Given*  
35  
36 156 *all the issues of concern during a typical prenatal visit, I consider discussing GWG a high*  
37  
38 157 *priority*). Responses indicated level of agreement with each statement on a scale from 1  
39  
40 158 (strongly disagree) to 5 (strongly agree). The survey also examined whether health care  
41  
42 159 providers considered themselves to be the most appropriate person within their practice setting to  
43  
44 160 provide GWG counselling (*I am the most appropriate provider in my practice setting to discuss*  
45  
46 161 *GWG*).  
47  
48  
49  
50  
51

### 52 162

### 53 163 *Data analysis*

54  
55  
56  
57  
58  
59  
60

1  
2  
3 164 GWG counselling practices of each health care provider group were calculated as frequency and  
4  
5  
6 165 percentage of responses, dichotomized into “Routine (undertaken with >90% of pregnant  
7  
8 166 patients)” and “Not routine” (all other response choices) based on the Institute of Medicine  
9  
10 167 recommendations that these practices occur with every woman (IOM, 2013).[15] Cases with  
11  
12 168 missing data were removed from analyses. Principal components analysis was used to reduce  
13  
14 169 the numerous survey questions into a smaller number of factors. The mean score of the items  
15  
16 170 loading onto each factor was used to represent that factor score for respondents. [36] For  
17  
18 171 example, four questions loaded onto a factor that was named “Providing Weight Gain Advice  
19  
20 172 and Discussing Risks” and were averaged together into a composite score for that factor. Mean  
21  
22 173 scores were calculated for the remaining factors of General Knowledge, Detailed Knowledge of  
23  
24 174 Practice Guidelines, and the Priority Level Health Care Providers Place on GWG, in a similar  
25  
26 175 manner. Differences in mean composite scores were compared among health care provider  
27  
28 176 disciplines using one-way ANOVA) with Bonferroni post-hoc tests; residuals for all composite  
29  
30 177 scores were normally distributed. Mean scores for each factor were used in multiple linear  
31  
32 178 regression models to evaluate the relationship between the predictors of interest and GWG  
33  
34 179 counselling practices. For all models, multicollinearity was not an issue with all tolerance values  
35  
36 180 >0.36 and variance inflation factors <2.8.  
37  
38  
39  
40  
41  
42  
43  
44

## 182 Qualitative methods

### 183 *Materials*

184 A semi-structured interview guide was developed by the study team based on the study  
185 objectives and included questions and prompts regarding health care provider practices in

1  
2  
3 186 relation to GWG, as well as the reasons behind these practices. The interview guide also  
4  
5 187 included questions regarding provider knowledge in and attitudes towards GWG.  
6  
7

8 188

9  
10 189 *Recruitment and data collection*  
11

12  
13 190 Potential participants were identified through collaborating members of the study team. A  
14  
15 191 purposive sample of maximum variation was recruited to gather the perspectives of health care  
16  
17 192 providers from the different disciplines practicing in urban or rural locations in two Canadian  
18  
19 193 provinces (Alberta and British Columbia). When these contacts were exhausted, an advertisement  
20  
21 194 was distributed by email to medical clinics relevant to the requirements for variability in the sample.  
22  
23 195 Interviews were conducted over the telephone, audio-recorded and transcribed verbatim.  
24  
25  
26

27 196

28  
29 197 *Data analysis*  
30

31 198 Qualitative content analysis was used to describe and inductively interpret the data.[37, 38]  
32  
33 199 Qualitative content analysis is a process that is a “reduction and sense making effort that takes a  
34  
35 200 volume of qualitative material and attempts to identify core consistencies and meanings”. [39](p.45)  
36  
37 201 Audio recordings and transcripts were reviewed, and reviewed again while making notes about  
38  
39 202 key words and phrases. Key concepts were categorized and re-categorized as patterns emerged.  
40  
41 203 Data analysis occurred concurrently with data collection, and sampling adequacy was  
42  
43 204 demonstrated by saturation of the data, as replication occurred in categories as new participants  
44  
45 205 were included in the analysis.[40] Findings were discussed and approved by the study team.  
46  
47  
48  
49

50 206

51  
52 207 Data integration  
53  
54  
55  
56  
57  
58  
59  
60

1  
2  
3 208 The categories emerging inductively from the interviews were compared with the results from  
4  
5 209 the quantitative survey to determine if findings from each method confirmed the other, as well as  
6  
7  
8 210 to expand the strength of each type of data to better explain the phenomenon.[41]  
9

10 211

## 14 212 **Results**

### 16 213 Participant characteristics

18 214 Overall, 1189 health care providers responded to the survey. Of these, 122 did not meet the  
19  
20  
21 215 eligibility criteria (i.e. did not see pregnant women in their practice), 27 did not specify their  
22  
23 216 health care provider discipline, 155 did not answer any questions beyond practice characteristics,  
24  
25 217 and 377 indicated a health care provider discipline that was outside the scope of these analyses.  
26  
27  
28 218 Thus, 508 responses from general practitioners, obstetricians, midwives, nurse practitioners and  
29  
30 219 registered nurses in primary care settings from across Canada are included in this analysis (Table  
31  
32  
33 220 1). Twenty-three health care providers from these same disciplines participated in the interviews.  
34

35 221

### 37 222 Gestational weight gain counselling practices of health care providers

#### 40 223 *Providing weight gain advice and discussing risks*

42 224 A small proportion of health care providers routinely provided women with a GWG target based  
43  
44 225 on their pre-pregnancy BMI and discussed the recommended rate of GWG based on their GWG  
45  
46  
47 226 target (21% and 16%; Table 2). Few indicated that they routinely discussed the impacts of  
48  
49 227 inappropriate GWG on mother (20%) and baby (19%). The composite score for “Providing  
50  
51 228 weight gain advice and discussing the risks” did not differ between health care provider  
52  
53  
54 229 disciplines (Table 3).

56 230

1  
2  
3 231 Key concepts and quotes relating to counselling practices that emerged from the interviews are  
4  
5 232 outlined in Table 4. Interviewees described the first prenatal visit as including measurement of  
6  
7  
8 233 weight, calculation of BMI, and a large amount of information sharing, including general  
9  
10 234 information on GWG. Some health care providers advised women on a total GWG target;  
11  
12 235 however, this was not always congruent with guidelines. The amount of information provided in  
13  
14 236 the first visit was perceived by the health care providers to be overwhelming for women.  
15  
16  
17  
18 237

19  
20 238 *Weight assessment*

21  
22 239 Approximately three-quarters of respondents weighed women at every visit (76%), while half of  
23  
24 240 respondents would routinely relay GWG information to women every time they are weighed  
25  
26  
27 241 (Table 2). Midwives reported measuring weight at every visit less frequently than all other  
28  
29 242 disciplines (Table 3).  
30  
31

32 243  
33  
34 244 Interviewees noted that weight was typically measured at each visit, except for midwives who  
35  
36 245 generally measured women's weight if clinically necessary, or if women requested them to do so  
37  
38 246 (Table 4). After the first visit, interview participants indicated that they revisited the topic to  
39  
40 247 varying levels of depth, typically only when the health care provider or woman expressed  
41  
42 248 concern about her weight.  
43  
44  
45

46 249

47  
48 250 *Discussing physical activity and food requirements*

49  
50 251 Nearly half (46%) of health care providers reported routinely discussing physical activity with  
51  
52 252 women while about one-third routinely discussed appropriate extra food requirements (28%),  
53  
54  
55 253 and only about one-third felt they could routinely give examples of appropriate changes that  
56  
57  
58  
59  
60

1  
2  
3 254 women could make to meet extra food requirements (32%) (Table 2). In contrast, over two-  
4  
5 255 thirds would discuss the importance of prenatal vitamins (67%). The composite score for the  
6  
7  
8 256 three survey questions regarding discussing physical activity and food requirements differed  
9  
10  
11 257 between health care provider disciplines (Table 3). Midwives did this more frequently than all  
12  
13 258 other disciplines except for nurse practitioners.

14  
15 259  
16  
17 260 Health care providers of all disciplines described providing general information on GWG,  
18  
19  
20 261 physical activity, and nutrition in the early stages of pregnancy, and many indicated providing  
21  
22 262 women with printed resources in this area (Table 4). The midwives interviewed described  
23  
24 263 spending more time assessing women's current lifestyle and providing individualized advice  
25  
26  
27 264 than did physicians (Table 4).

28  
29 265

30  
31  
32 266 Predictors of counselling practices

33  
34 267 Health care providers, regardless of discipline, reported similar responses for having appropriate  
35  
36 268 general knowledge of GWG, physical activity, and nutrition, as well as knowledge of related  
37  
38  
39 269 practice guidelines (Table 3); only the difference between midwives and registered nurses  
40  
41 270 responses was significant. There were significant differences in the level of priority placed on  
42  
43 271 GWG. Midwives and obstetricians had lower composite scores for the priority level they place  
44  
45  
46 272 on GWG than general practitioners and nurse practitioners, but did not differ significantly from  
47  
48 273 each other (Table 3). The majority of health care providers considered discussing GWG with  
49  
50 274 women to be within their role (77%).

51  
52 275

53  
54  
55 276 *Predictors of providing weight gain advice and discussing risks*



1  
2  
3 277 The composite score for providing weight gain advice and discussing risks of inappropriate  
4  
5 278 GWG was most strongly related to the priority level that health care providers placed on GWG  
6  
7  
8 279 (Table 5), followed by their detailed knowledge of GWG, physical activity, and nutrition  
9  
10 280 guidelines.  
11

12  
13 281  
14  
15 282 Generally, health care providers in the interviews reported that GWG discussions may receive  
16  
17 283 lower priority due to the time constraints in a typical appointment (Table 4). This was related to  
18  
19  
20 284 their compensation method, as general practitioners and obstetricians were remunerated in a fee-  
21  
22 285 for-service model that resulted in restriction on the length of appointments, as well as the topics  
23  
24 286 covered. Midwives were compensated by course-of-care, which resulted in longer and more  
25  
26  
27 287 flexible appointments. However, midwives described a lower priority level placed on GWG, as  
28  
29 288 their practice was less focussed on weight, in particular weight assessment, and more focussed  
30  
31 289 on a woman's overall health and wellbeing. Health care providers' perceptions of the sensitivity  
32  
33 290 of discussing GWG with pregnant women were also related to their providing weight gain advice  
34  
35 291 and discussing risks (Table 4). Some health care providers noted their discomfort with initiating  
36  
37 292 GWG discussions, or discussing GWG too frequently, as they were concerned that this may  
38  
39 293 cause psychological distress for the woman.  
40  
41  
42  
43 294

#### 44 45 295 *Predictors of discussing physical activity and food requirements*

46  
47 296 The priority level that health care providers place on GWG, their detailed knowledge of GWG,  
48  
49 297 nutrition, and physical activity guidelines, and their general knowledge of this area were all  
50  
51 298 significantly related to their discussing physical activity and food requirements with women  
52  
53  
54  
55  
56  
57  
58  
59  
60

1  
2  
3 299 during a prenatal visit (Table 6). After adjustment for practice characteristics, being a midwife  
4  
5 300 remained a significant predictor of this activity within a prenatal visit.  
6  
7

8 301  
9  
10 302 Midwifery practices in relation to discussing physical activity and food requirements also  
11  
12 303 emerged from the interview data (Table 4). Midwives reported that their approach focussed on  
13  
14 304 overall health and wellness, and centred on support for women. Knowledge was another key  
15  
16 305 factor that came to light in the interviews, as some health care providers noted a need for  
17  
18 306 additional knowledge, particularly in nutrition and maternal obesity. For health care providers  
19  
20 307 working within a multidisciplinary team, access to dietetic services was an important  
21  
22 308 enhancement to GWG counselling practices.  
23  
24  
25  
26

27 309

## 30 310 **Discussion**

31  
32 311 GWG counselling by health care providers falls below the recommendations from the Institute of  
33  
34 312 Medicine and other national health agencies. [15] Although many of the health care providers  
35  
36 313 interviewed indicated that they regularly calculate and record women's pre-pregnancy BMI, few  
37  
38 314 survey respondents from any discipline routinely provided women with a comprehensive GWG  
39  
40 315 recommendation and advice on their rate of GWG based on their pre-pregnancy BMI. In  
41  
42 316 addition, few survey respondents reported discussing the risks of inappropriate GWG with  
43  
44 317 women. While many health care providers reported providing a general message of the  
45  
46 318 importance of prenatal vitamins, fewer reported routinely discussing topics such as appropriate  
47  
48 319 extra food requirements. Weight was typically measured at each prenatal appointment, but not  
49  
50 320 discussed unless it was a concern. This is in contrast with what women report they need from  
51  
52 321 their health care provider, as other studies from our research group have indicated that women  
53  
54  
55  
56  
57  
58  
59  
60

1  
2  
3 322 would like their health care provider to initiate a discussion about GWG early in pregnancy, and  
4  
5 323 continue the discussions throughout pregnancy and postpartum so that they are updated on their  
6  
7  
8 324 GWG progress. [22]  
9

10 325  
11  
12 326 The low rates of some of these counselling practices are concerning since it is likely that survey  
13  
14  
15 327 respondents are those who would be most likely to counsel women about GWG. There is  
16  
17 328 evidence suggesting that women whose health care providers discuss GWG and related lifestyle  
18  
19  
20 329 behaviours in pregnancy with them have lower GWG and lower likelihood of having a baby that  
21  
22 330 is large for gestational age. [42-44] This underlines the potential level of influence that health  
23  
24 331 care providers have with pregnant women and the importance of refining their training or  
25  
26 332 antenatal care pathways to support such conversations.  
27  
28

29 333  
30  
31 334 To our knowledge, this is the first mixed methods study to examine GWG counselling, in  
32  
33 335 particular for the specific counselling practices recommended by the Institute of Medicine.  
34  
35 336 While survey and qualitative research studies from various parts of the world have also found  
36  
37 337 low rates of GWG counselling as reported by patients, other surveys of health care providers  
38  
39 338 have found high self-reported rates of counselling.[20, 28] This discrepancy may be due to the  
40  
41 339 frequency with which health care providers undertake counselling, as studies from the US have  
42  
43 340 found that they report discussing GWG more often with women who are overweight or obese at  
44  
45  
46 341 the start of their pregnancy.[24] Therefore, they may report that they provide GWG counselling,  
47  
48 342 but not to every pregnant woman. Further, when the depth of this counselling is explored, the  
49  
50 343 self-reported rates are likely to diminish. Future studies should objectively assess the quality of  
51  
52 344 these discussions and evaluate their impact on GWG, health behaviours like physical activity and  
53  
54  
55  
56  
57  
58  
59  
60

1  
2  
3 345 diet, and women's perceptions of support. Furthermore, research is needed to elucidate the most  
4  
5 346 effective counselling methods that will help women achieve appropriate GWG. This additional  
6  
7  
8 347 information could help guide or refine approaches to antenatal care undertaken by different  
9  
10 348 groups of care providers.  
11

12  
13 349  
14  
15 350 This study identified multi-level influences on GWG counselling. Most notably, the priority  
16  
17 351 level that health care providers placed on GWG had the strongest relationship with their  
18  
19 352 practices. The qualitative results provided context to this finding, linking the priority level of  
20  
21  
22 353 GWG to factors at the health care system level, such as the time available in a typical prenatal  
23  
24 354 appointment, and the compensation that health care providers receive for their time.  
25  
26  
27 355 Additionally, this study identified factors at the individual level. This included the importance of  
28  
29 356 detailed knowledge of practice guidelines, which also was strongly associated with counselling  
30  
31 357 practices.  
32

33  
34 358  
35  
36 359 One novel finding was the new insights into the different approach reported by midwives.  
37  
38 360 Midwives noted that their focus on the overall wellbeing of the women meant they discussed  
39  
40 361 physical activity and nutrition in more depth than did physicians, and they measured weight less  
41  
42 362 frequently. Even after controlling for multiple other predictors, midwives were significantly  
43  
44 363 more likely than other health care providers to report discussing physical activity and food  
45  
46 364 requirements with women during routine prenatal care. In other research, patients of midwives  
47  
48 365 were more likely to recall having discussed physical activity with their health care provider as  
49  
50 366 compared to patients of general practitioners and obstetricians,[29] and midwives themselves  
51  
52  
53 367 report providing physical activity counselling to women more frequently than other  
54  
55  
56  
57  
58  
59  
60

1  
2  
3 368 disciplines.[20, 28] While the present study considered physical activity and nutrition  
4  
5  
6 369 counselling practices as one composite score, there seems to be growing evidence that midwives  
7  
8 370 provide more lifestyle counselling than other health care provider disciplines. The impact of  
9  
10 371 counselling by a midwife as compared to other disciplines on the health outcomes for women is  
11  
12 372 an area for future exploration.

13 373

### 14 15 16 17 374 *Strengths and Limitations*

18  
19  
20 375 A major strength of this study is the use of mixed research methods. This allowed for some  
21  
22 376 verification of findings between methods, and provided a broader picture of “who is doing  
23  
24 377 what”, as well as “why and how are they doing it”. To our knowledge, this is the largest and  
25  
26  
27 378 most comprehensive survey on this topic to date. While prenatal care varies between countries,  
28  
29 379 the topics covered in this survey are considered routine and are undertaken as part of standard  
30  
31 380 prenatal care in most developed countries.

32 381

33  
34  
35  
36 382 This study has limitations that should be considered. It was not possible to calculate a true  
37  
38 383 response rate for the survey since the survey was distributed using email lists and social media  
39  
40 384 through professional associations and networks. While this method of recruitment allowed for a  
41  
42 385 wider reach, and ultimately more responses, those who responded may be more likely to engage  
43  
44 386 in activities related to GWG counselling. This could lead to inflation of the reported frequency  
45  
46 387 of specific GWG counselling practices. This is concerning as they are already quite low for  
47  
48 388 some counselling practices and further highlights the need for targeted interventions in this area.

49 389

1  
2  
3 390 The qualitative interviews were only conducted in two provinces, and there is the potential that  
4  
5 391 this does not accurately capture the practices and predictors in other geographic areas. However,  
6  
7  
8 392 the congruency of the qualitative and quantitative findings suggests that this is unlikely.  
9  
10 393 Furthermore, a recent systematic review found few differences in barriers and facilitators to  
11  
12 394 pregnancy weight management in studies from around the world, suggesting that the findings of  
13  
14 395 the current study may help inform practice in various health care systems.[45]  
15  
16  
17 396

18  
19  
20 397 *Recommendations*

21  
22 398 Interventions to implement best practices should consider the multi-level influences on GWG  
23  
24 399 counselling practices, as well as the discipline of the health care provider, in order to be effective  
25  
26 400 at changing health care provider behaviours. Providers across disciplines require knowledge of  
27  
28 401 GWG, physical activity, and nutrition guidelines and some may need system-level changes such  
29  
30 402 as more time in an appointment to help them make it a priority in their practice. A different  
31  
32 403 model for dissemination of this knowledge needs consideration. Multidisciplinary clinics that  
33  
34 404 include professionals with a background in nutrition and physical activity, and group educational  
35  
36 405 sessions may be important in this regard. The latter approach could allow participants to discuss  
37  
38 406 these issues amongst themselves and may provide positive reinforcement of new knowledge and  
39  
40 407 help to shift old beliefs.[42] Furthermore, discussion of healthy GWG and maintenance of a  
41  
42 408 healthy weight trajectory with women by health providers is a missed opportunity for positive  
43  
44 409 feedback for a healthy and potentially long-term behaviour.  
45  
46  
47  
48  
49

50 410  
51  
52 411 Expanding discussions on GWG to a healthier lifestyle is highly relevant given the growing body  
53  
54 412 of evidence related to its impact on disease in later life.[10] Health care providers are well  
55  
56  
57  
58  
59  
60

1  
2  
3 413 positioned to help women identify plans to change behaviour and improve health outcomes.  
4  
5  
6 414 Strong communication between health care providers and pregnant women is a key component  
7  
8 415 to moving forward. Supporting health care providers to better counsel their pregnant patients on  
9  
10 416 appropriate GWG is one important step towards breaking the intergenerational cycle of obesity,  
11  
12 417 and improving the health of generations to come.  
13  
14

15 418  
16  
17  
18  
19  
20  
21  
22  
23  
24  
25  
26  
27  
28  
29  
30  
31  
32  
33  
34  
35  
36  
37  
38  
39  
40  
41  
42  
43  
44  
45  
46  
47  
48  
49  
50  
51  
52  
53  
54  
55  
56  
57  
58  
59  
60

For peer review only

419 **References**

- 420 1 Viswanathan M, Siega-Riz AM, Moos MK, et al. Outcomes of maternal weight gain.  
421 *Evid Rep Technol Assess* 2008(168):1-223.
- 422 2 Carreno CA, Clifton RG, Hauth JC, et al. Excessive early gestational weight gain and risk  
423 of gestational diabetes mellitus in nulliparous women. *Obstet Gynecol* 2012;119(6):1227-33.
- 424 3 Joy S, Istwan N, Rhea D, et al. The impact of maternal obesity on the incidence of  
425 adverse pregnancy outcomes in high-risk term pregnancies. *Am J Perinatology* 2009;26(5):345-  
426 9.
- 427 4 Thorsdottir I, Torfadottir JE, Birgisdottir BE, et al. Weight gain in women of normal  
428 weight before pregnancy: complications in pregnancy or delivery and birth outcome. *Obstet*  
429 *Gynecol* 2002;99(5 Pt 1):799-806.
- 430 5 Kristensen J, Vestergaard M, Wisborg K, et al. Pre-pregnancy weight and the risk of  
431 stillbirth and neonatal death. *BJOG* 2005;112(4):403-8.
- 432 6 Robinson SM, Crozier SR, Harvey NC, et al. Modifiable early-life risk factors for  
433 childhood adiposity and overweight: an analysis of their combined impact and potential for  
434 prevention. *Am J Clin Nutr* 2015;101(2):368-75.
- 435 7 Houghton LC, Ester WA, Lumey LH, et al. Maternal weight gain in excess of pregnancy  
436 guidelines is related to daughters being overweight 40 years later. *Am J Obstet Gynecol*  
437 2016;215(2):246.e1-.e8.
- 438 8 Hutcheon JA, Chapinal N, Bodnar LM, et al. The INTERGROWTH-21st gestational  
439 weight gain standard and interpregnancy weight increase: A population-based study of  
440 successive pregnancies. *Obesity (Silver Spring)* 2017;25(6):1122-7.
- 441 9 Gilmore LA, Klempel-Donchenko M, Redman LM. Pregnancy as a window to future  
442 health: Excessive gestational weight gain and obesity. *Seminars in Perinatology* 2015;39(4):296-  
443 303.
- 444 10 Leddy MA, Power ML, Schulkin J. The impact of maternal obesity on maternal and fetal  
445 health. *Rev Obstet Gynecol* 2008;1(4):170-8.
- 446 11 Melzer K, Schutz Y. Pre-pregnancy and pregnancy predictors of obesity. *Int J Obesity*  
447 2010;34 Suppl 2:S44-52.
- 448 12 Scott C, Andersen CT, Valdez N, et al. No global consensus: a cross-sectional survey of  
449 maternal weight policies. *BMC Pregnancy Childbirth* 2014;14:167.
- 450 13 Health Canada. Healthy Weight Gain During Pregnancy. Ottawa, Canada: Government  
451 of Canada; 2014.
- 452 14 Institute of Medicine. Weight Gain During Pregnancy: Reexamining the Guidelines.  
453 Rasmussen KM, Yaktine A, editors. Washington, DC: National Academies Press; 2009.
- 454 15 Institute of Medicine. Implementing Guidelines on Weight Gain and Pregnancy.  
455 Bethesda, MD: Institute of Medicine and National Research Council; 2013.
- 456 16 O'Connor DL, Blake J, Bell R, et al. Canadian Consensus on Female Nutrition:  
457 Adolescence, Reproduction, Menopause and Beyond. *JOGC* 2016;38(6):408-554.
- 458 17 Australian Government. Healthy Eating When You're Pregnant or Breastfeeding  
459 Canberra, Australia: National Health and Medical Research Council; 2015 [June 13, 2017].  
460 Available from: [https://www.eatforhealth.gov.au/eating-well/healthy-eating-throughout-all-  
461 life/healthy-eating-when-you%E2%80%99re-pregnant-or-breastfeeding](https://www.eatforhealth.gov.au/eating-well/healthy-eating-throughout-all-life/healthy-eating-when-you%E2%80%99re-pregnant-or-breastfeeding).
- 462 18 American College of Obstetricians and Gynecologists. Nutrition During Pregnancy 2015  
463 [June 13, 2017]. Available from: <http://www.acog.org/Patients/ACOG-Pregnancy-Book>.



- 1  
2  
3 464 19 Swedish National Food Agency. Food for you who are pregnant. Uppsala, Sweden:  
4 465 Swedish National Food Agency; 2015.
- 5 466 20 Lutsiv O, Bracken K, Pullenayegum E, et al. Little congruence between health care  
6 467 provider and patient perceptions of counselling on gestational weight gain. *J Obstet Gynaecol*  
7 468 *Can* 2012;34(6):518-24.
- 8 469 21 Ferrari RM, Siega-Riz AM, Evenson KR, et al. Provider advice about weight loss and  
9 470 physical activity in the postpartum period. *J Womens Health (Larchmt)* 2010;19(3):397-406.
- 10 471 22 Nikolopoulos H, Mayan M, MacIsaac J, et al. Women's perceptions of discussions about  
11 472 gestational weight gain with health care providers during pregnancy and postpartum: a  
12 473 qualitative study. *BMC Pregnancy Childbirth* 2017;17:97.
- 13 474 23 Chang T, Llanes M, Gold KJ, et al. Perspectives about and approaches to weight gain in  
14 475 pregnancy: a qualitative study of physicians and nurse midwives. *BMC Pregnancy Childbirth*  
15 476 2013;13:47-.
- 16 477 24 Duthie EA, Drew EM, Flynn KE. Patient-provider communication about gestational  
17 478 weight gain among nulliparous women: a qualitative study of the views of obstetricians and first-  
18 479 time pregnant women. *BMC Pregnancy Childbirth* 2013;13:231.
- 19 480 25 Herring SJ, Platek DN, Elliott P, et al. Addressing Obesity in Pregnancy: What Do  
20 481 Obstetric Providers Recommend? *Journal of Women's Health* 2010;19(1):65-70.
- 21 482 26 Stotland NE, Gilbert P, Bogetz A, et al. Preventing excessive weight gain in pregnancy:  
22 483 how do prenatal care providers approach counseling? *J Womens Health (Larchmt)*  
23 484 2010;19(4):807-14.
- 24 485 27 Chalmers B, Dzakpasu S, Heaman M, et al. The Canadian maternity experiences survey:  
25 486 an overview of findings. *J Obstet Gynaecol Can* 2008;30(3):217-28.
- 26 487 28 Ferraro ZM, Boehm KS, Gaudet LM, et al. Counseling about gestational weight gain and  
27 488 healthy lifestyle during pregnancy: Canadian maternity care providers' self-evaluation. *Int J*  
28 489 *Womens Health* 2013;5:629-36.
- 29 490 29 McDonald SD, Pullenayegum E, Bracken K, et al. Comparison of midwifery, family  
30 491 medicine, and obstetric patients' understanding of weight gain during pregnancy: a minority of  
31 492 women report correct counselling. *J Obstet Gynaecol Can* 2012;34(2):129-35.
- 32 493 30 Zhang W, Creswell J. The use of "mixing" procedure of mixed methods in health services  
33 494 research. *Medical Care* 2013;51(8):e51-7.
- 34 495 31 Creswell J, Klassen AC, Plano Clark V, et al. Best Practices for Mixed Methods Research  
35 496 in the Health Sciences. In: Office of Behavioral and Social Sciences Research, editor. Bethesda,  
36 497 MD: National Institutes of Health; 2011.
- 37 498 32 Harris PA, Taylor R, Thielke R, et al. Research electronic data capture (REDCap)--a  
38 499 metadata-driven methodology and workflow process for providing translational research  
39 500 informatics support. *J Biomed Inform* 2009;42(2):377-81.
- 40 501 33 Prenatal Nutrition Guidelines for Health Professionals - Gestational Weight Gain  
41 502 Recommendations. Health Canada. Ottawa: Health Canada; 2010.
- 42 503 34 Health Canada. Eating Well with Canada's Food Guide. In: Office of Nutrition Policy and  
43 504 Promotion, editor. Ottawa, ON Canada: Government of Canada; 2007.
- 44 505 35 Public Health Agency of Canada. Physical Activity and Pregnancy. Ottawa, ON, Canada:  
45 506 Public Health Agency of Canada; 2012.
- 46 507 36 Norman G. Likert scales, levels of measurement and the "laws" of statistics. *Adv Health*  
47 508 *Sci Educ Theory Pract* 2010;15(5):625-32.

- 1  
2  
3 509 37 Elo S, Kyngas H. The qualitative content analysis process. *J Adv Nursing*  
4 510 2008;62(1):107-15.  
5 511 38 Hsieh HF, Shannon SE. Three approaches to qualitative content analysis. *Qual Health*  
6 512 *Res* 2005;15(9):1277-88.  
7 513 39 Patton M. *Qualitative Research and Evaluation Methods*, 3rd Edition. Thousand Oaks,  
8 514 CA, USA: Sage; 2002.  
9 515 40 Morse JM, Barrett M, Mayan M, et al. Verification strategies for establishing reliability  
10 516 and validity in qualitative research. *Intl J Qualitative Methods* 2002;1(2):Article 2.  
11 517 41 Fetters MD, Curry LA, Creswell JW. Achieving integration in mixed methods designs-  
12 518 principles and practices. *Health Services Research* 2013;48(6 Pt 2):2134-56.  
13 519 42 Washington Cole KO, Gudzone KA, Bleich SN, et al. Influence of the 5A's Counseling  
14 520 Strategy on Weight Gain During Pregnancy: An Observational Study. *Journal of Women's*  
15 521 *Health* 2017.  
16 522 43 Peccei A, Blake-Lamb T, Rahilly D, et al. Intensive Prenatal Nutrition Counseling in a  
17 523 Community Health Setting: A Randomized Controlled Trial. *Obstet Gynecol* 2017;130(2):423-  
18 524 32.  
19 525 44 Mitchell LJ, Ball LE, Ross LJ, et al. Effectiveness of Dietetic Consultations in Primary  
20 526 Health Care: A Systematic Review of Randomized Controlled Trials. *Journal of the Academy of*  
21 527 *Nutrition and Dietetics* 2017.  
22 528 45 Heslehurst N, Newham J, Maniatopoulos G, et al. Implementation of pregnancy weight  
23 529 management and obesity guidelines: A meta-synthesis of healthcare professionals' barriers and  
24 530 facilitators using the Theoretical Domains Framework. *Pregnancy Hypertens* 2014;4(3):234-5.  
25 531 46 Magriples U, Boynton MH, Kershaw TS, et al. The impact of group prenatal care on  
26 532 pregnancy and postpartum weight trajectories. *Am J Obstet and Gynecol* 2015;213(5):688 e1-9.

533

534

1  
2  
3 535 **Authors' contributions**  
4

5 536 RCB and HN designed the study, and with MV and HPV developed the interview guide and  
6  
7  
8 537 survey questionnaire. JM and HN recruited interview participants and conducted the interviews.  
9  
10 538 JM recruited survey participants, conducted the qualitative and quantitative analyses and wrote  
11  
12 539 the first draft of the manuscript. HN and RCB contributed to the qualitative analysis and TB and  
13  
14 540 RCB contributed to quantitative analysis. VJ contributed to recruitment of interview  
15  
16  
17 541 participants. All authors made significant contributions to the critical review and revisions of the  
18  
19 542 manuscript. JM and RCB are the guarantors of the manuscript. All authors had full access to all  
20  
21 543 of the data (including statistical reports and tables) in the study and can take responsibility for the  
22  
23 544 integrity of the data and the accuracy of the data analysis. JM affirms that the manuscript is an  
24  
25 545 honest, accurate, and transparent account of the study being reported; that no important aspects  
26  
27 546 of the study have been omitted.  
28  
29  
30  
31

32  
33 547 **Acknowledgements**  
34

35 548 We would like to thank all of the participants in both components of the study for their time and  
36  
37 549 insight. We would also like to thank Melisa Spaling for her contribution to the analysis of the  
38  
39 550 qualitative data and Adam King for his help with recruiting participants to interview from British  
40  
41 551 Columbia.  
42  
43

44 552 **Conflict of interest**  
45

46  
47 553 All authors have completed the ICMJE uniform disclosure form at  
48  
49 554 [www.icmje.org/coi\\_disclosure.pdf](http://www.icmje.org/coi_disclosure.pdf) and declare: no support from any organisation for the  
50  
51 555 submitted work; no financial relationships with any organisations that might have an interest in  
52  
53 556 the submitted work in the previous three years; no other relationships or activities that could  
54  
55 557 appear to have influenced the submitted work.  
56  
57  
58  
59  
60

1  
2  
3 558  
4  
5  
6 559 **Funding:**  
7  
8 560 This study was funded by grants from Alberta Innovates – Health Solutions and the Danone  
9  
10 561 Institute of Canada. The funders had no involvement in the study design; in the collection,  
11  
12 562 analysis, and interpretation of data; in the writing of the report; nor the decision to submit the  
13  
14 563 article for publication.  
15  
16  
17 564  
18  
19  
20 565 Data Sharing Statement  
21  
22 566 Data used in this study are not currently available for data sharing.  
23  
24  
25  
26  
27  
28  
29  
30  
31  
32  
33  
34  
35  
36  
37  
38  
39  
40  
41  
42  
43  
44  
45  
46  
47  
48  
49  
50  
51  
52  
53  
54  
55  
56  
57  
58  
59  
60

567 Table 1. Characteristics of participating Canadian health care providers.

|                                                   | Survey Participants<br>N=508 |     | Interview Participants<br>N=23 |     |
|---------------------------------------------------|------------------------------|-----|--------------------------------|-----|
|                                                   | n                            | %   | n                              | %   |
| Health care provider discipline                   |                              |     |                                |     |
| General Practitioner                              | 159                          | 31% | 7                              | 30% |
| Obstetrician                                      | 139                          | 27% | 5                              | 22% |
| Midwife                                           | 97                           | 19% | 5                              | 22% |
| Registered Nurse - Primary Care                   | 75                           | 15% | 4                              | 17% |
| Nurse Practitioner                                | 38                           | 7%  | 2                              | 9%  |
| Province                                          |                              |     |                                |     |
| British Columbia                                  | 55                           | 11% | 9                              | 39% |
| Alberta                                           | 149                          | 30% | 14                             | 61% |
| Saskatchewan and Manitoba                         | 56                           | 11% |                                | N/A |
| Ontario                                           | 168                          | 33% |                                |     |
| Quebec                                            | 17                           | 3%  |                                |     |
| Maritimes*                                        | 47                           | 9%  |                                |     |
| Territories*                                      | 11                           | 2%  |                                |     |
| Location of practice                              |                              |     |                                |     |
| Urban                                             | 296                          | 58% |                                | N/C |
| Rural                                             | 125                          | 25% |                                |     |
| Urban and rural                                   | 86                           | 17% |                                |     |
| Proportion of all patients who are pregnant women |                              |     |                                |     |
| <10%                                              | 103                          | 20% |                                | N/C |
| 10-30%                                            | 94                           | 19% |                                |     |
| 30-60%                                            | 119                          | 23% |                                |     |
| 60-90%                                            | 46                           | 9%  |                                |     |
| >90%                                              | 146                          | 29% |                                |     |
| Stage of pregnancy at first visit                 |                              |     |                                |     |
| Before pregnancy                                  | 30                           | 6%  |                                | N/C |
| First trimester                                   | 328                          | 65% |                                |     |
| Second trimester                                  | 74                           | 15% |                                |     |
| Third trimester                                   | 34                           | 7%  |                                |     |
| Don't know/too variable to say                    | 41                           | 8%  |                                |     |

\*Maritimes=Newfoundland and Labrador, New Brunswick, Nova Scotia

\*Territories=Northwest Territories, Yukon Territory (no respondents from Nunavut)

N/A=Not applicable

N/C=Data not collected

568

569 Table 2. Survey responses regarding gestational weight gain counselling practices routinely  
 570 undertaken (with >90% of pregnant patients) by Canadian health care providers.

|                                                                                                                            | Health care provider discipline <sup>1</sup> |     |     |     |    |     |    |     |    |     | All |     |
|----------------------------------------------------------------------------------------------------------------------------|----------------------------------------------|-----|-----|-----|----|-----|----|-----|----|-----|-----|-----|
|                                                                                                                            | GP                                           |     | OB  |     | MW |     | NP |     | RN |     |     |     |
|                                                                                                                            | n                                            | %   | n   | %   | n  | %   | n  | %   | n  | %   | n   | %   |
| I provide women with a weight gain target based on their pre-pregnancy BMI                                                 |                                              |     |     |     |    |     |    |     |    |     |     |     |
|                                                                                                                            | 27                                           | 17% | 35  | 25% | 23 | 24% | 8  | 21% | 15 | 21% | 108 | 21% |
|                                                                                                                            | Missing                                      |     |     |     |    |     |    |     |    |     | 4   | 1%  |
| I discuss the recommended rate of weight gain based on their weight gain target                                            |                                              |     |     |     |    |     |    |     |    |     |     |     |
|                                                                                                                            | 22                                           | 14% | 19  | 14% | 15 | 16% | 11 | 29% | 15 | 21% | 82  | 16% |
|                                                                                                                            | Missing                                      |     |     |     |    |     |    |     |    |     | 6   | 1%  |
| I discuss the impact of inappropriate weight gain on the mother during pregnancy                                           |                                              |     |     |     |    |     |    |     |    |     |     |     |
|                                                                                                                            | 22                                           | 14% | 33  | 24% | 21 | 22% | 13 | 34% | 11 | 15% | 100 | 20% |
|                                                                                                                            | Missing                                      |     |     |     |    |     |    |     |    |     | 4   | 1%  |
| I discuss the impact of inappropriate weight gain on the baby                                                              |                                              |     |     |     |    |     |    |     |    |     |     |     |
|                                                                                                                            | 21                                           | 13% | 30  | 22% | 21 | 22% | 15 | 40% | 10 | 14% | 97  | 19% |
|                                                                                                                            | Missing                                      |     |     |     |    |     |    |     |    |     | 7   | 1%  |
| I weigh women at every visit                                                                                               |                                              |     |     |     |    |     |    |     |    |     |     |     |
|                                                                                                                            | 146                                          | 92% | 122 | 88% | 34 | 35% | 32 | 84% | 47 | 65% | 381 | 76% |
|                                                                                                                            | Missing                                      |     |     |     |    |     |    |     |    |     | 4   | 1%  |
| I relay weight gain information to women every time I weigh them                                                           |                                              |     |     |     |    |     |    |     |    |     |     |     |
|                                                                                                                            | 82                                           | 52% | 62  | 45% | 38 | 40% | 25 | 66% | 41 | 57% | 248 | 50% |
|                                                                                                                            | Missing                                      |     |     |     |    |     |    |     |    |     | 7   | 1%  |
| I discuss appropriate physical activity with pregnant women                                                                |                                              |     |     |     |    |     |    |     |    |     |     |     |
|                                                                                                                            | 75                                           | 48% | 53  | 38% | 61 | 64% | 20 | 53% | 22 | 31% | 231 | 46% |
|                                                                                                                            | Missing                                      |     |     |     |    |     |    |     |    |     | 7   | 1%  |
| I discuss appropriate extra food requirements with pregnant women                                                          |                                              |     |     |     |    |     |    |     |    |     |     |     |
|                                                                                                                            | 41                                           | 26% | 26  | 19% | 37 | 39% | 14 | 37% | 21 | 30% | 139 | 28% |
|                                                                                                                            | Missing                                      |     |     |     |    |     |    |     |    |     | 7   | 1%  |
| I can easily give examples of appropriate changes that women could make to meet extra food requirements                    |                                              |     |     |     |    |     |    |     |    |     |     |     |
|                                                                                                                            | 40                                           | 26% | 30  | 22% | 48 | 50% | 17 | 46% | 23 | 32% | 158 | 32% |
|                                                                                                                            | Missing                                      |     |     |     |    |     |    |     |    |     | 9   | 2%  |
| I discuss the importance of taking prenatal vitamins                                                                       |                                              |     |     |     |    |     |    |     |    |     |     |     |
|                                                                                                                            | 124                                          | 79% | 85  | 61% | 49 | 51% | 34 | 90% | 44 | 61% | 336 | 67% |
|                                                                                                                            | Missing                                      |     |     |     |    |     |    |     |    |     | 6   | 1%  |
| <sup>1</sup> GP=General Practitioner, OB=Obstetrician, MW=midwife, NP=Nurse Practitioner, RN=Primary Care Registered Nurse |                                              |     |     |     |    |     |    |     |    |     |     |     |

571

572

573 Table 3. Composite scores for gestational weight gain counselling practices and influences on  
 574 practices compared by health care provider discipline

|                                                                                           | Health care provider discipline <sup>1</sup> |                |                |                |                | All            | Sig.   | Post-hoc                         |
|-------------------------------------------------------------------------------------------|----------------------------------------------|----------------|----------------|----------------|----------------|----------------|--------|----------------------------------|
|                                                                                           | GP                                           | OB             | MW             | NP             | RN             |                |        |                                  |
| Providing weight gain advice and discussing the risks                                     | 2.95<br>(1.1)                                | 3.03<br>(1.2)  | 2.95<br>(1.2)  | 2.91<br>(1.5)  | 2.54<br>(1.3)  | 2.91<br>(1.2)  | 0.072  | N/A                              |
| Weighing women at every visit                                                             | 4.87<br>(0.54)                               | 4.75<br>(0.80) | 3.36<br>(1.56) | 4.61<br>(1.10) | 4.03<br>(1.55) | 4.41<br>(1.22) | <0.001 | MW < All**                       |
| Discussing physical activity and food requirements                                        | 3.65<br>(1.1)                                | 3.37<br>(1.1)  | 4.23<br>(0.8)  | 3.81<br>(1.1)  | 3.31<br>(1.4)  | 3.65<br>(1.1)  | <0.001 | MW > (GP, OB, RN)**              |
| General knowledge in GWG, physical activity, and nutrition                                | 3.50<br>(0.75)                               | 3.61<br>(0.75) | 3.77<br>(0.70) | 3.42<br>(0.80) | 3.36<br>(0.94) | 3.56<br>(0.78) | 0.017  | MW > RN*                         |
| Detailed knowledge of GWG, physical activity, and nutrition guidelines                    | 2.85<br>(0.98)                               | 2.96<br>(0.91) | 3.22<br>(0.88) | 2.85<br>(1.02) | 3.00<br>(1.01) | 2.97<br>(0.95) | 0.047  | MW > GP*                         |
| Priority level of discussing, assessing, and assisting women with appropriate weight gain | 4.09<br>(0.61)                               | 3.82<br>(0.82) | 3.59<br>(0.86) | 3.8<br>(0.87)  | 4.25<br>(0.65) | 3.89<br>(0.78) | <0.001 | MW < (GP, NP)**<br>OB- (GP, NP)* |

<sup>1</sup>GP=General Practitioner, OB=Obstetrician, MW=midwife, NP=Nurse Practitioner, RN=Primary Care Registered Nurse; \*Significant at 0.05; \*\*Significant at 0.01; Scale of 1=lowest to 5=highest score  
 Compared by one-way ANOVA

575 Table 4. Overarching categories and key concepts emerging from qualitative content analysis of  
 576 interviews with health care providers.

577

| Category                                | Concept                                                                             | Representative quote(s)                                                                                                                                                                                                                                                                                                                                                                                                                                                                                                                             |
|-----------------------------------------|-------------------------------------------------------------------------------------|-----------------------------------------------------------------------------------------------------------------------------------------------------------------------------------------------------------------------------------------------------------------------------------------------------------------------------------------------------------------------------------------------------------------------------------------------------------------------------------------------------------------------------------------------------|
| Practices                               | The first visit involves a large amount of information sharing                      | <p>“That’s the trouble with prenatal care. There’s so much information that women need, especially in the first trimester. Genetic screening, and lifestyle, and alcohol, and smoking, and family, and you know, on and on and on.”</p> <p>- General Practitioner</p>                                                                                                                                                                                                                                                                               |
|                                         | Weight is assessed routinely, but not discussed in detail unless there is a concern | <p>“Weight is something I would bring up with everyone at the first visit and only - well, I always check the weight every single other visit. But if there's no problem, I wouldn't bring it up. I might make a comment like, ‘Oh, your weight looks good.’”</p> <p>- General Practitioner</p>                                                                                                                                                                                                                                                     |
|                                         | Midwives have a different approach to gestational weight gain                       | <p>“We are aware of their weight gain. But more important to us than their weight gain is their nutrition and how they're feeling about it and, you know, providing encouragement, support and education so that they can be empowered to make healthy choices.”</p> <p>- Midwife</p> <p>"I feel like it’s really important to discuss healthy eating and exercise, but the actual focus on the weight gain and the number of pounds that a woman should gain, I don’t really feel that’s important at all, that piece of it.”</p> <p>- Midwife</p> |
| Individual level influences on practice | Priority level                                                                      | <p>“But certainly there are definitely times where I feel constricted by time. I think nutrition and exercise is a huge priority, so that's just my personal opinion. I think that I wouldn't - I don't know, I would make the time.”</p> <p>- Midwife</p>                                                                                                                                                                                                                                                                                          |
|                                         | Sensitivity of the discussion                                                       | <p>“Any discussion around weight can be a very charged issue and, depending on the woman and her BMI, and her history, she may have had a history of an eating disorder or whatever. You don’t always know what issues she’s had in the past and they can be very significant, so there could be a lot of anxiety on the patient’s side around weight gain and so that will always cover a conversation, especially if you don’t know her very well.”</p> <p>- General Practitioner</p>                                                             |
|                                         | General knowledge of gestational weight gain, nutrition, and                        | <p>“I do find that nutrition is not covered at all in my medical school and through residency. I don’t remember any teaching sessions at all on weight gain in pregnancy, obesity in pregnancy or that. We have one teaching session</p>                                                                                                                                                                                                                                                                                                            |



1  
2  
3  
4  
5  
6  
7  
8  
9  
10  
11  
12  
13  
14  
15  
16  
17  
18  
19  
20  
21  
22  
23  
24  
25  
26  
27  
28  
29  
30  
31  
32  
33  
34  
35  
36  
37  
38  
39  
40  
41  
42  
43  
44  
45  
46  
47  
48  
49  
50  
51  
52  
53  
54  
55  
56  
57  
58  
59  
60

physical activity

every two years for an hour on it.”

- Obstetrician

Detailed knowledge  
of practice  
guidelines

“I have to know so many rules about all sorts of things. I always kind of go by, you know, 5, 10, 15. So those three numbers I remember, 5, 10, 15. If you're overweight, if your BMI is higher than, you know, 26 or 27, or higher than 28 or so, I would say, 5 kilos. If your weight is pretty well normal I'd say 10 kilos. And if your weight is under I'd say 15 kilos.”

- General Practitioner

Time and  
compensation

“And that's a different model for us because we're not billing per fee code. So when I see a woman, I can talk to her or counsel her or do anything in that visit, it doesn't – so, it's different than the physicians, I guess, because they're constrained by billing for what they're talking to the people about.”

- Midwife

System  
level  
influences  
on  
practice

“I guess the biggest structural problem is the short prenatal visit and the amount of information that has to be gathered and disseminated in that visit, which is typically anything from ten to 15 minutes long.”

- General Practitioner

Access to allied  
health services

“So I find the most successful story of patients achieving their [weight] goals and continuing postpartum, were women who I initially brought up the topic [with], referred to our dietitian and psychologist and they [women] continued to follow up with me and with them. So they had that longer term follow-up and this goal setting and checking in with someone.”

- Obstetrician

578

579 Table 5. Predictors of Canadian health care providers providing advice to pregnant women  
 580 about gestational weight gain and discussing risks of inappropriate weight gain during a prenatal  
 581 visit.

| Variable                                                                                  | Model <sup>1</sup> |                 |          |
|-------------------------------------------------------------------------------------------|--------------------|-----------------|----------|
|                                                                                           | Unstd $\beta$      | S.E. of $\beta$ | Std Beta |
| (Constant)                                                                                | -1.14**            | 0.38            |          |
| General practitioner ( <i>reference</i> )                                                 |                    |                 |          |
| Obstetrician                                                                              | 0.242              | 0.145           | 0.093    |
| Midwife                                                                                   | -0.076             | 0.199           | -0.026   |
| Primary care RN                                                                           | -0.029             | 0.177           | -0.008   |
| Nurse Practitioner                                                                        | -0.057             | 0.206           | -0.012   |
| Detailed knowledge of GWG, physical activity, and nutrition guidelines                    | 0.26**             | 0.069           | 0.202    |
| General knowledge in GWG, physical activity, and nutrition                                | 0.098              | 0.081           | 0.065    |
| Priority level of discussing, assessing, and assisting women with appropriate weight gain | 0.71**             | 0.071           | 0.459    |
| Role (I am the most appropriate provider to discuss gestational weight gain)              | 0.172              | 0.133           | 0.056    |
|                                                                                           | R <sup>2</sup>     | 0.392           |          |

\*p<0.05 \*\*p<0.01

<sup>1</sup>Model is adjusted for: urban/rural location, Proportion of all patients who are pregnant, and trimester of pregnancy at first visit.

Unstd=Unstandardized, S.E.=Standard Error, Std=Standardized

582

583

584 Table 6. Predictors of Canadian health care providers discussing physical activity and food  
 585 requirements with women as part of a prenatal visit.

| Variable                                                                                  | Model <sup>1</sup> |                 |          |
|-------------------------------------------------------------------------------------------|--------------------|-----------------|----------|
|                                                                                           | Unstd $\beta$      | S.E. of $\beta$ | Std Beta |
| (Constant)                                                                                | 0.688              | 0.345           |          |
| General practitioner ( <i>reference</i> )                                                 |                    |                 |          |
| Obstetrician                                                                              | 0.022              | 0.13            | 0.009    |
| Midwife                                                                                   | 0.518**            | 0.179           | 0.192    |
| Primary care RN                                                                           | 0                  | 0.160           | 0        |
| Nurse Practitioner                                                                        | 0.342              | 0.189           | 0.077    |
| Detailed knowledge of GWG, physical activity, and nutrition guidelines                    | 0.277**            | 0.063           | 0.229    |
| General knowledge in GWG, physical activity, and nutrition                                | 0.311**            | 0.073           | 0.22     |
| Priority level of discussing, assessing, and assisting women with appropriate weight gain | 0.341**            | 0.064           | 0.236    |
| Role (I am the most appropriate provider to discuss gestational weight gain)              | 0.18               | 0.12            | 0.063    |
|                                                                                           | R <sup>2</sup>     | 0.434           |          |

\*p<0.05 \*\*p<0.01

<sup>1</sup>Model is adjusted for: urban/rural location, proportion of all patients who are pregnant, and trimester of pregnancy at first visit

Unstd=Unstandardized, S.E.=Standard Error, Std=Standardized

586

# Healthy Pregnancy Weight Gain Research Study

1  
2  
3  
4  
5  
6  
7  
8  
9  
10  
11  
12  
13  
14  
15  
16  
17  
18  
19  
20  
21  
22  
23  
24  
25  
26  
27  
28  
29  
30  
31  
32  
33  
34  
35  
36  
37  
38  
39  
40  
41  
42  
43  
44  
45  
46  
47  
48  
49  
50  
51  
52  
53  
54  
55  
56  
57  
58  
59  
60

For peer review only

1 Do you see pregnant women in your practice?  Yes  
2  No  
3  
4 In which Canadian province or territory do you work?  British Columbia  
5  Alberta  
6  Saskatchewan  
7  Manitoba  
8  Ontario  
9  Quebec  
10  Newfoundland and Labrador  
11  New Brunswick  
12  Prince Edward Island  
13  Nova Scotia  
14  Yukon  
15  Northwest Territories  
16  Nunavut  
17 What best describes the location of your practice?  Urban  
18  Rural  
19  Urban and rural  
20  
21 In what type of practice setting do you work?  Solo  
22 (Please select all that apply)  Group  
23  Interdisciplinary  
24  Academic  
25  
26 What is your occupational specialty?  General Practitioner/Family Physician  
27  Obstetrician/Gynecologist  
28  Physician - other  
29  Registered Midwife  
30  Nurse Practitioner  
31  Registered Nurse  
32  Prenatal Educator  
33  Registered Dietitian  
34  Other  
35  
36 My primary practice is:  Public/community health  
37  Primary care  
38  Acute care  
39  Other  
40  
41 Please specify:  Registered Nurse  
42  Perinatal support worker  
43  Other  
44  
45 Please specify: \_\_\_\_\_  
46  
47  
48  
49  
50  
51  
52  
53  
54  
55  
56  
57  
58  
59  
60

1 What are some common reasons for pregnant women to be referred to you? (Check all that apply)

- 2
- 3  General healthy eating
- 4  High pre-pregnancy BMI
- 5  Low pre-pregnancy BMI
- 6  Excessive weight gain
- 7  Inadequate weight gain
- 8  Multiple food restrictions, e.g. vegetarian, food allergies, etc.
- 9  Nausea/vomiting
- 10  Twin/multiple pregnancy
- 11  Adolescent pregnancy
- 12  Concurrent medical condition, e.g. diabetes in pregnancy
- 13  All pregnant women in my health care setting are referred to me
- 14  I see pregnant women in a group setting
- 15  Other (Please specify)
- 16
- 17
- 18
- 19
- 20
- 21
- 22
- 23
- 24
- 25
- 26
- 27
- 28
- 29
- 30
- 31
- 32
- 33
- 34
- 35
- 36
- 37
- 38
- 39
- 40
- 41
- 42
- 43
- 44
- 45
- 46
- 47
- 48
- 49
- 50
- 51
- 52
- 53
- 54
- 55
- 56
- 57
- 58
- 59
- 60

For peer review only

1  
2  
3  
4  
5  
6  
7  
8  
9  
10  
11  
12  
13  
14  
15  
16  
17  
18  
19  
20  
21  
22  
23  
24  
25  
26  
27  
28  
29  
30  
31  
32  
33  
34  
35  
36  
37  
38  
39  
40  
41  
42  
43  
44  
45  
46  
47  
48  
49  
50  
51  
52  
53  
54  
55  
56  
57  
58  
59  
60

Of all the patient/clients you see in your practice, what proportion are pregnant women?

- < 10%    10-30%    30-60%    60-90%    >90%

At what stage during pregnancy do you typically see women for the first time?

- Before they become pregnant, i.e. planning to become pregnant  
 First trimester  
 Second trimester  
 Third trimester  
 Don't know/too variable to say

For peer review only

1 **Given all of the issues of concern during a typical prenatal visit, how often do women ask you**  
 2 **about:**  
 3  
 4

|    | Almost never(< 10%)   | Rarely(10-30%)        | Sometimes(30-60%)     | Often(60-90%)         | Almost always(>90%)   |
|----|-----------------------|-----------------------|-----------------------|-----------------------|-----------------------|
| 5  |                       |                       |                       |                       |                       |
| 6  |                       |                       |                       |                       |                       |
| 7  |                       |                       |                       |                       |                       |
| 8  | <input type="radio"/> |
| 9  |                       |                       |                       |                       |                       |
| 10 |                       |                       |                       |                       |                       |
| 11 | <input type="radio"/> |
| 12 | <input type="radio"/> |
| 13 | <input type="radio"/> |
| 14 |                       |                       |                       |                       |                       |
| 15 | <input type="radio"/> |
| 16 |                       |                       |                       |                       |                       |
| 17 |                       |                       |                       |                       |                       |
| 18 |                       |                       |                       |                       |                       |
| 19 |                       |                       |                       |                       |                       |
| 20 |                       |                       |                       |                       |                       |
| 21 |                       |                       |                       |                       |                       |
| 22 |                       |                       |                       |                       |                       |
| 23 |                       |                       |                       |                       |                       |
| 24 |                       |                       |                       |                       |                       |
| 25 |                       |                       |                       |                       |                       |
| 26 |                       |                       |                       |                       |                       |
| 27 |                       |                       |                       |                       |                       |
| 28 |                       |                       |                       |                       |                       |
| 29 |                       |                       |                       |                       |                       |
| 30 |                       |                       |                       |                       |                       |
| 31 |                       |                       |                       |                       |                       |
| 32 |                       |                       |                       |                       |                       |
| 33 |                       |                       |                       |                       |                       |
| 34 |                       |                       |                       |                       |                       |
| 35 |                       |                       |                       |                       |                       |
| 36 |                       |                       |                       |                       |                       |
| 37 |                       |                       |                       |                       |                       |
| 38 |                       |                       |                       |                       |                       |
| 39 |                       |                       |                       |                       |                       |
| 40 |                       |                       |                       |                       |                       |
| 41 |                       |                       |                       |                       |                       |
| 42 |                       |                       |                       |                       |                       |
| 43 |                       |                       |                       |                       |                       |
| 44 |                       |                       |                       |                       |                       |
| 45 |                       |                       |                       |                       |                       |
| 46 |                       |                       |                       |                       |                       |
| 47 |                       |                       |                       |                       |                       |
| 48 |                       |                       |                       |                       |                       |
| 49 |                       |                       |                       |                       |                       |
| 50 |                       |                       |                       |                       |                       |
| 51 |                       |                       |                       |                       |                       |
| 52 |                       |                       |                       |                       |                       |
| 53 |                       |                       |                       |                       |                       |
| 54 |                       |                       |                       |                       |                       |
| 55 |                       |                       |                       |                       |                       |
| 56 |                       |                       |                       |                       |                       |
| 57 |                       |                       |                       |                       |                       |
| 58 |                       |                       |                       |                       |                       |
| 59 |                       |                       |                       |                       |                       |
| 60 |                       |                       |                       |                       |                       |

For peer review only



1 **With what percentage of pregnant women do you undertake the following activities?**

|    | < 10% | 10-30% | 30-60% | 60-90% | >90% |
|----|-------|--------|--------|--------|------|
| 2  |       |        |        |        |      |
| 3  |       |        |        |        |      |
| 4  |       |        |        |        |      |
| 5  |       |        |        |        |      |
| 6  |       |        |        |        |      |
| 7  |       |        |        |        |      |
| 8  |       |        |        |        |      |
| 9  |       |        |        |        |      |
| 10 |       |        |        |        |      |
| 11 |       |        |        |        |      |
| 12 |       |        |        |        |      |
| 13 |       |        |        |        |      |
| 14 |       |        |        |        |      |
| 15 |       |        |        |        |      |
| 16 |       |        |        |        |      |
| 17 |       |        |        |        |      |
| 18 |       |        |        |        |      |
| 19 |       |        |        |        |      |
| 20 |       |        |        |        |      |
| 21 |       |        |        |        |      |
| 22 |       |        |        |        |      |
| 23 |       |        |        |        |      |
| 24 |       |        |        |        |      |
| 25 |       |        |        |        |      |
| 26 |       |        |        |        |      |
| 27 |       |        |        |        |      |
| 28 |       |        |        |        |      |
| 29 |       |        |        |        |      |
| 30 |       |        |        |        |      |
| 31 |       |        |        |        |      |
| 32 |       |        |        |        |      |
| 33 |       |        |        |        |      |
| 34 |       |        |        |        |      |
| 35 |       |        |        |        |      |
| 36 |       |        |        |        |      |
| 37 |       |        |        |        |      |
| 38 |       |        |        |        |      |
| 39 |       |        |        |        |      |
| 40 |       |        |        |        |      |
| 41 |       |        |        |        |      |
| 42 |       |        |        |        |      |
| 43 |       |        |        |        |      |
| 44 |       |        |        |        |      |
| 45 |       |        |        |        |      |
| 46 |       |        |        |        |      |
| 47 |       |        |        |        |      |
| 48 |       |        |        |        |      |
| 49 |       |        |        |        |      |
| 50 |       |        |        |        |      |
| 51 |       |        |        |        |      |
| 52 |       |        |        |        |      |
| 53 |       |        |        |        |      |
| 54 |       |        |        |        |      |
| 55 |       |        |        |        |      |
| 56 |       |        |        |        |      |
| 57 |       |        |        |        |      |
| 58 |       |        |        |        |      |
| 59 |       |        |        |        |      |
| 60 |       |        |        |        |      |

1  
2  
3  
4  
5  
6  
7  
8  
9  
10  
11  
12  
13  
14  
15  
16  
17  
18  
19  
20  
21  
22  
23  
24  
25  
26  
27  
28  
29  
30  
31  
32  
33  
34  
35  
36  
37  
38  
39  
40  
41  
42  
43  
44  
45  
46  
47  
48  
49  
50  
51  
52  
53  
54  
55  
56  
57  
58  
59  
60

**I am confident that I could accurately summarize at least 80% of the content of each of the following guidelines to my colleagues within the next week:**

|                                                                                                                                                            | Strongly disagree     | Disagree              | Neither disagree nor agree | Agree                 | Strongly agree        |
|------------------------------------------------------------------------------------------------------------------------------------------------------------|-----------------------|-----------------------|----------------------------|-----------------------|-----------------------|
| Health Canada 2010 guidelines for pregnancy weight gain                                                                                                    | <input type="radio"/> | <input type="radio"/> | <input type="radio"/>      | <input type="radio"/> | <input type="radio"/> |
| Joint Society of Obstetricians and Gynecologists of Canada (SOGC) and Canadian Society for Exercise Physiology (CSEP) guidelines for exercise in pregnancy | <input type="radio"/> | <input type="radio"/> | <input type="radio"/>      | <input type="radio"/> | <input type="radio"/> |
| Physical Activity Readiness Medical Examination (PARMed-X) for Pregnancy                                                                                   | <input type="radio"/> | <input type="radio"/> | <input type="radio"/>      | <input type="radio"/> | <input type="radio"/> |
| Health Canada's Prenatal Nutrition Guidelines for Health Professionals                                                                                     | <input type="radio"/> | <input type="radio"/> | <input type="radio"/>      | <input type="radio"/> | <input type="radio"/> |

For peer review only

1 **Given all of the issues of concern during a typical prenatal visit, I consider...**

|                                                                                                                                                                                        | Strongly disagree     | Disagree              | Neither disagree nor agree | Agree                 | Strongly agree        |
|----------------------------------------------------------------------------------------------------------------------------------------------------------------------------------------|-----------------------|-----------------------|----------------------------|-----------------------|-----------------------|
| 7 Discussing appropriate gestational weight gain with women a high priority                                                                                                            | <input type="radio"/> | <input type="radio"/> | <input type="radio"/>      | <input type="radio"/> | <input type="radio"/> |
| 11 Assessing gestational weight gain a high priority                                                                                                                                   | <input type="radio"/> | <input type="radio"/> | <input type="radio"/>      | <input type="radio"/> | <input type="radio"/> |
| 14 Assisting women with appropriate gestational weight gain (e.g. addressing barriers and facilitators; providing resources; referrals to appropriate providers; etc.) a high priority | <input type="radio"/> | <input type="radio"/> | <input type="radio"/>      | <input type="radio"/> | <input type="radio"/> |

22 Is there anything that could increase the level of priority you place on discussing, assessing, or assisting gestational weight gain with pregnant women?

29 Are there any changes you would suggest to increase the likelihood of discussing, assessing or assisting women with gestational weight gain? (Please select all that apply)

- Including "gestational weight gain" on the prenatal form
- Including "calculate cumulative gestational weight gain" on the antenatal record
- Increase your knowledge of consequences of inappropriate gestational weight gain
- Having resources that will prompt/remind me to discuss, assess or assist women
- Change in fee schedule
- Other

39 Please specify:

40 \_\_\_\_\_

43 Is the fee schedule appropriate for the workload in prenatal visits?

- Yes
- No
- Not applicable

46 Please explain:

47 \_\_\_\_\_

1  
2 **In your practice setting, who do you think is the most suitable person to discuss, assess,**  
3 **assist, and follow-up with gestational weight gain with women?**  
4

|    | Discuss                  | Assess                   | Assist                   | Follow-up                |
|----|--------------------------|--------------------------|--------------------------|--------------------------|
| 5  |                          |                          |                          |                          |
| 6  |                          |                          |                          |                          |
| 7  | <input type="checkbox"/> | <input type="checkbox"/> | <input type="checkbox"/> | <input type="checkbox"/> |
| 8  |                          |                          |                          |                          |
| 9  | <input type="checkbox"/> | <input type="checkbox"/> | <input type="checkbox"/> | <input type="checkbox"/> |
| 10 |                          |                          |                          |                          |
| 11 | <input type="checkbox"/> | <input type="checkbox"/> | <input type="checkbox"/> | <input type="checkbox"/> |
| 12 |                          |                          |                          |                          |
| 13 | <input type="checkbox"/> | <input type="checkbox"/> | <input type="checkbox"/> | <input type="checkbox"/> |
| 14 |                          |                          |                          |                          |
| 15 | <input type="checkbox"/> | <input type="checkbox"/> | <input type="checkbox"/> | <input type="checkbox"/> |
| 16 |                          |                          |                          |                          |
| 17 | <input type="checkbox"/> | <input type="checkbox"/> | <input type="checkbox"/> | <input type="checkbox"/> |
| 18 |                          |                          |                          |                          |
| 19 | <input type="checkbox"/> | <input type="checkbox"/> | <input type="checkbox"/> | <input type="checkbox"/> |
| 20 |                          |                          |                          |                          |
| 21 | <input type="checkbox"/> | <input type="checkbox"/> | <input type="checkbox"/> | <input type="checkbox"/> |
| 22 |                          |                          |                          |                          |

23  
24 Please specify provider: \_\_\_\_\_  
25  
26  
27  
28  
29  
30  
31  
32  
33  
34  
35  
36  
37  
38  
39  
40  
41  
42  
43  
44  
45  
46  
47  
48  
49  
50  
51  
52  
53  
54  
55  
56  
57  
58  
59  
60

**To what extent do you agree or disagree with the following statements? I have appropriate...**

|                                                                                                                            | Strongly disagree     | Disagree              | Neither disagree nor agree | Agree                 | Strongly agree        |
|----------------------------------------------------------------------------------------------------------------------------|-----------------------|-----------------------|----------------------------|-----------------------|-----------------------|
| Knowledge to recommend guideline concordant pregnancy weight gain                                                          | <input type="radio"/> | <input type="radio"/> | <input type="radio"/>      | <input type="radio"/> | <input type="radio"/> |
| Information resources to support recommending guideline concordant pregnancy weight gain                                   | <input type="radio"/> | <input type="radio"/> | <input type="radio"/>      | <input type="radio"/> | <input type="radio"/> |
| Knowledge to recommend guideline concordant physical activity                                                              | <input type="radio"/> | <input type="radio"/> | <input type="radio"/>      | <input type="radio"/> | <input type="radio"/> |
| Information resources to support recommending guideline concordant physical activity                                       | <input type="radio"/> | <input type="radio"/> | <input type="radio"/>      | <input type="radio"/> | <input type="radio"/> |
| Knowledge to recommend guideline concordant healthy eating during pregnancy                                                | <input type="radio"/> | <input type="radio"/> | <input type="radio"/>      | <input type="radio"/> | <input type="radio"/> |
| Information resources to support recommending guideline concordant healthy eating during pregnancy                         | <input type="radio"/> | <input type="radio"/> | <input type="radio"/>      | <input type="radio"/> | <input type="radio"/> |
| Programs for referral to promote healthy nutrition during pregnancy (e.g. dietitian, prenatal nutrition education classes) | <input type="radio"/> | <input type="radio"/> | <input type="radio"/>      | <input type="radio"/> | <input type="radio"/> |
